# Supplementary material for: The effectiveness of training strategies to improve healthcare provider practices in low-income and middle-income countries
Source: BMJ Glob Health. 2021 Jan 15;6(1):e003229. doi: 10.1136/bmjgh-2020-003229 (PMC7813291; doi:10.1136/bmjgh-2020-003229)
Supplement: Supplementary data [file bmjgh-2020-003229supp002.xlsx]

## Sheet: Introduction
This Excel file contains a database and documentation from the Health Care Provider Performance Review, a systematic review of the effectiveness of strategies to improve health care provider performance in low- and middle-income countries.
For more information on this review, contact Alexander Rowe (email: axr9@cdc.gov) or Samantha Rowe (email: HCPperformancereview@gmail.com).
The "codebook" spreadsheet describes the variables in the database.
The "study data Sep.29.2020" spreadsheet is the database. Each row is one study. Results are only for studies involving training strategies for health care providers with at least 1 process outcome. Process outcomes are health care provider behaviors related to patient assessment, diagnosis, treatment, counseling, referral, vaccination, chemoprophylaxis, and documentation.
The database should be considered a final version as of Sep 29, 2020. All data elements in this database are accurate, to the best knowledge of the investigators at the time the database was made. It is possible that future versions of the database might be different, as revisions and corrections are possible.

## Sheet: codebook
Section	Variable	Definition	Coding
Identifier variables	idnum	unique identification number for study	number
	PubID	unique identification number for study report	number
Contextual factor variables	Equiv_comp	study involved comparison of equivalency (intervention versus gold standard control group)	1 if yes, 0 if no
	StudySet_Public	study setting was public facility	1 if yes, 0 if no
	StudySet_AnyPvt	study setting was any private facility, regardless of whether for-profit or not-for-profit	1 if yes, 0 if no
	FINAL_ROB_SCORE	risk of bias score for study	3 if low risk of bias, 2 if moderate risk of bias, 1 if high risk of bias, 0 if very high risk of bias
	HCPcat1	study involved physicians	1 if yes, 0 if no
	HCPcat2	study involved clinical officers	1 if yes, 0 if no
	HCPcat3	study involved nurses or midwives	1 if yes, 0 if no
	HCPcat4	study involved pharmacists or laboratorians	1 if yes, 0 if no
	HCPcat5	study involved paramedics or unspecified non-physician health care provider	1 if yes, 0 if no
	HCPcat6	study involved health educators or information officers	1 if yes, 0 if no
	HCPcat7	study involved students in a clinical field (e.g., medical or nursing student)	1 if yes, 0 if no
	HCPcat8	study involved health aides	1 if yes, 0 if no
	HCPcat9	study involved lay health workers	1 if yes, 0 if no
	HCPcat10	study involved unspecified health professionals	1 if yes, 0 if no
	q7new	WHO region of study country (could be multiple regions)	text
	CountryName	Name of study country (could be multiple countries)	text
	PlaceServ_HospInpt	place of health service was hospital inpatient department	1 if yes, 0 if no
	PlaceServ_OPD	place of health service was hospital outpatient department or health facility outpatient clinic	1 if yes, 0 if no
	PlaceServ_nonHospHF	place of health service was neither a hospital nor health facility (e.g., pharmacy, community setting)	1 if yes, 0 if no
	QQ_year	year of midpoint of field work	number
	HIV_study2	study's health topic related to HIV	1 if yes, 0 if no
	study_scientific	study was described in at least 1 article published in scientific journal	1 if yes, 0 if no
	STUDY_DESIGN_FIN	study design	text
	RCT	study design was randomized, controlled trial	1 if yes, 0 if no
	ITSnoctrl	study design was interrupted time series with no controls	1 if yes, 0 if no
	QQ_URBAN_RURAL	urban/rural setting of study	1. Urban +/- periurban, 2. Periurban only, 3. Urban-rural mix, 4. Town +/- rural, 5. Rural only, 6. Unclear or not stated
	INCOMEnew	World Bank economy category of study country	1 if low-income, 2 if lower-middle income, 3 if upper-middle income, 4 if mix of low and lower-middle, 5 if mix of lower-middle and upper-middle
	GNI	World Bank gross national income per capita for study country, in US dollars	number
	q14	number of arms in study	number
	q17_label	description of strategy in study arm 1	text
	q18_label	description of strategy in study arm 2	text
	q19_label	description of strategy in study arm 3	text
	q20_label	description of strategy in study arm 4	text
Citation information	Report1	citation for study report 1	text
	Report2	citation for study report 2	text
	Report3	citation for study report 3	text
	Report4	citation for study report 4	text
	Report5	citation for study report 5	text
	Report6	citation for study report 6	text
	Report7	citation for study report 7	text
	Report8	citation for study report 8	text
	Report9	citation for study report 9	text
	Report10	citation for study report 10	text
	Report11	citation for study report 11	text
	Report12	citation for study report 12	text
	Report13	citation for study report 13	text

## Sheet: study data Sep.29.2020
idnum	Equiv_comp	StudySet_Public	StudySet_AnyPvt	FINAL_ROB_SCORE	HCPcat1	HCPcat2	HCPcat3	HCPcat4	HCPcat5	HCPcat6	HCPcat7	HCPcat8	HCPcat9	HCPcat10	q7new	CountryName	PlaceServ_HospInpt	PlaceServ_OPD	PlaceServ_nonHospHF	QQ_year	HIV_study2	study_scientific	STUDY_DESIGN_FIN	RCT	ITSnoctrl	QQ_URBAN_RURAL	INCOMEnew	GNI	q14	q17_label	q18_label	q19_label	q20_label	Report1	Report2	Report3	Report4	Report5	Report6	Report7	Report8	Report9	Report10	Report11	Report12	Report13
100001	0	1	0	3	1	0	0	0	1	0	0	0	0	0	SEARO	Sri Lanka	0	1	0	1988	0	1	Pre-post study with randomized controls	1	0	4. Town +/- rural	2	460	3	no intervention	newsletter + poster for HCP	training + newsletter + poster for HCP		Angunawela II, Diwan VK, Tomson G. Experimental evaluation of the effects of drug information on antibiotic prescribing: a study in outpatient care in an area of Sri Lanka. International Journal of Epidemiology. 1991; 20(2):558-564.
500001	0	1	0	1	1	0	0	0	1	0	0	0	0	0	SEARO	Indonesia	0	1	0	1992	0	1	Pre-post study with randomized controls	1	0	6. Unclear or not stated	2	680	3	no intervention	small group training + pamphlet for HCP + printed STG	large group training + pamphlet for HCP + printed STG		Santoso B, Suryawati S, Prawaitasari JE. Small group intervention vs. formal seminar for improving appropriate use. Social Science and Medicine, 1996; 42(8):1163-1168.
600001	0	1	0	0	1	0	0	0	0	0	0	0	0	0	AMRO	Mexico	0	1	0	1991	0	1	Pre-post study with non-randomized controls	0	0	1. Urban +/- periurban	3	3180	2	no intervention	training + poster for HCP + team-based problem solving + audit with feedback + peer review + group process			Perez-Cuevas R, Guiscafre H, Munoz O, Reyes H, Tome P, Libreros V, Gutierrez G. Improving physician prescribing patterns to treat rhinopharyngitis. Intervention strategies in two health systems of Mexico. Social Science and Medicine. 1996; 42(8): 1185-1194.
1000001	0	1	0	3	1	1	0	0	0	0	0	0	0	0	AFRO	Zambia	0	1	0	1991	0	1	Pre-post study with randomized controls	1	0	1. Urban +/- periurban	1	400	2	no intervention	training			Bexell A, Lwando E, von Hofsten B, Tembo S, Eriksson B, Diwan VK. Improving drug use through continuing education: a randomized controlled trial in Zambia. J Clin Epidemiol, 1996; 49(3): 355-357.
1300001	0	1	0	2	1	0	1	0	0	0	0	0	0	0	AMRO	Honduras	0	1	0	1993.5	0	1	Post-only study with randomized controls	1	0	1. Urban +/- periurban	2	630	2	no intervention	training + printed job aid			de Negri B, DiPrete Brown L, Hernandez O, Rosenbaum J, Roter D. Improving interpersonal communication between health care providers and clients. Quality Assurance Methodology Refinement Series. Bethesda, MD: Quality Assurance Project. Part 2: Case studies; p. 27-F-33.	de Negri B, DiPrete Brown L, Hernandez O, Rosenbaum J, Roter D. Improving interpersonal communication between health care providers and clients. Quality Assurance Methodology Refinement Series. Bethesda, MD: Quality Assurance Project. Part 1: A conceptual framework for interpersonal communication; p. 5-26.	Brown LD, De Negri B, Hernandez O, Dominguez L, Sanchack JH, Roter D. An evaluation of the impact of training Honduran health care providers in interpersonal communication. International Journal for Quality in Health Care, 2000; 12(6): 495-501.
1900001	0	1	0	3	0	0	1	0	0	0	0	0	0	0	AFRO	South Africa	0	1	0	2003	1	1	Post-only study with randomized controls	1	0	3. Urban-rural mix	3	2840	2	no intervention	in-service training + second opinion + provision of medical equipment + printed STG literature + other printed job aid			Bheekie A, Buskens I, Allen S, English R, Mayers P, Fairall L, Majara B, Bateman ED, Zwarenstein M, Bachmann M. The Practical Approach to Lung Health in South Africa (PALSA) intervention: respiratory guideline implementation for nurse trainers. International Nursing Review. 2006; 53(4):261-8.	Fairall L, Bachmann MO, Zwarenstein M, Bateman ED, Niessen LW, Lombard C, Majara B, English R, Bheekie A, van Rensburg D, Mayers P, Peters A, Chapman R. Cost-effectiveness of educational outreach to primary care nurses to increase tuberculosis case detection and improve respiratory care: economic evaluation alongside a randomised trial. Tropical Medicine and International Health. 2010;15(3):277-8…	English RG, Bateman ED, Zwarenstein MF, Fairall LR, Bheekie A, Bachmann MO, Majara B, Ottmani SE, Scherpbier RW. Development of a South African integrated syndromic respiratory disease guideline for primary care. Primary Care Respiratory Journal. 2008;17(3):156-63.	Fairall LR, Zwarenstein M, Bateman ED et al. Effect of educational outreach to nurses on tuberculosis case detection and primary care of respiratory illness: pragmatic cluster randomized controlled trial. BMJ, 2005; 331:750-754.	Carrier J. Educational outreach visits to primary care nurses improved tuberculosis detection and treatment of obstructive lung disease. Evidence Based Nursing, 2006;9(2):58.
2000001	0	1	0	1	0	0	1	0	0	0	0	1	0	0	AFRO	Ghana	0	1	0	1996	0	1	Pre-post study with non-randomized controls	0	0	5. Rural only	1	380	2	no intervention	training + pamphlet for HCP + printed job aid + medicine label			Agyepong IA, Ansah E, Gyapong M, Adjei S, Barnish G, Evans D. Strategies to improve adherence to recommended chloroquine treatment regimes: a quasi-experiment in the context of integrated primary health care delivery in Ghana. Social Science and Medicine, 2002; 55:2215-2226.
3500001	0	1	0	1	1	0	0	0	0	0	0	0	0	0	SEARO	Bangladesh	0	1	0	1994	0	1	Pre-post study with non-randomized controls	0	0	6. Unclear or not stated	1	310	3	no intervention	printed STG	training + printed STG		Chowdhury AKA, Khan MOF, Matin A, Haque Z. Impact of standard treatment guidelines and small group training on prescribing for diarrhoea in under-five children in Bangladesh. INRUD News, 1995;5(2):20.	Chowdhury AKA, Khan OF, Matin MA, Begum K, Galib MA. Effect of standard treatment guidelines with or without prescription audit on prescribing for acute respiratory tract infection (ARI) and diarrhoea in some thana health complexes (THCs) of Bangladesh. Bangladesh Medical Research Council Bulletin, 2007;33(1):21-30.
4200001	0	1	0	1	1	0	1	0	0	0	0	0	0	0	AMRO	Guatemala	0	1	0	1995.5	0	1	Pre-post study with non-randomized controls	0	0	3. Urban-rural mix	2	1490	2	no intervention	training + self-study materials for HCP			Flores R, Robles J, Burkhalter BR. Implementation and Evaluation of a Distance Education Course on the Management of Cholera and Diarrheal Diseases. Published for INCAP, PAHO/WHO, and USAID by the BASICS Project, Arlington, VA, 1998. Available online: http://www.basics.org/publications/pubs/implementation/contents.htm	Flores R, Robles J, Burkhalter BR. Distance education with tutoring improves diarrhea case management in Guatemala. International Journal for Quality in Health Care, 2002; 14(supplement 1): 47-56.
4500001	0	0	0	0	1	0	1	0	0	0	0	0	0	0	AMRO	Cuba	0	1	0	1991	0	1	Pre-post study with non-randomized controls	0	0	1. Urban +/- periurban	2	2340	4	no intervention	training + supervision + printed literature for HCP + community education meetings + printed materials for community	training + supervision + printed literature for HCP	community education meetings + printed materials for community	Gonzalez Ochoa E, Armas Perez L, Bravo Gonzalez JR, Cabrales Escobar J, Rosales Corrales R, Abreu Suarez G. Prescription of antibiotics for mild acute respiratory infections in children. Bulletin of the Pan American Health Organization, 1996; 30(2): 106-117.
4800001	0	1	0	0	1	0	1	0	0	0	0	0	0	0	AMRO	Mexico	0	1	0	1988	0	1	Pre-post study with non-randomized controls	0	0	1. Urban +/- periurban	3	1990	2	no intervention	training + printed STG + printed literature for HCP + peer review + group process + improved medicine accessibility + patient education meeting + printed materials for patients + printed job aid			Guiscafre H, Martínez H, Reyes H, Pérez-Cuevas R, Castro R, Muñoz O, Gutiérrez G. From research to public health interventions. I. Impact of an educational strategy for physicians to improve treatment practices of common diseases. Archives of Medical Research. 1995;26 Spec No:S31-9.	Guiscafré H, Muñoz O, Padilla G, Reyes RM, González E, Bronfman M, Gutiérrez G. [Strategies for improving the therapeutic patterns used in acute diarrhea in primary medical care units. VI. Evaluation of the strategy aimed at family physicians for increasing the use of oral rehydration and decreasing that of antibiotics and restrictive diets]. Archivos de investigación médica. 1988;19(4):395-407. …	Gutierrez G, Guiscafre H, Bronfman M, Walsh J, Martinez H, Munoz O. Changing physician prescribing patterns: Evaluation of an educational strategy for acute diarrhea in Mexico City. Medical Care, 1994; 32(5):436-446.	Bronfman M, Castro R, Castro V, Guiscafré H, Muñoz O, Gutiérrez G. [Medical prescription and treatment compliance in acute infectious diarrhea: indirect impact of an educational intervention]. Salud pública de México. 1991 Nov-Dec;33(6):568-75. [Article in Spanish]	Gutiérrez G, Guiscafré H, Bronfman M, Martínez C, Padilla G, Muñoz O. [Strategies for improving the therapeutic patterns used in acute diarrhea in primary medical care units. I. Methodology and features of the medical units and the population studied]. Archivos de investigación médica. 1988;19(4):335-49. [Article in Spanish]	Gutiérrez G, Guiscafré H, Muñoz O. Strategies for improving the therapeutic patterns used in acute diarrhea in primary medical care units. X. Conclusions and research perspectives. Archivos de investigación médica. 1988;19(4):437-43.	Guiscafré H, Padilla G, Reyes RM, Bronfman M, Castro V, Muñoz O, Gutiérrez G. [Strategies for improving the therapeutic patterns used in acute diarrhea in primary medical care units. VIII. Evaluation of the technics for supplementary information during the medical consultation]. Archivos de investigación médica. 1988;19(4):419-25. [Article in Spanish]	Castro R, Bronfman M, Castro V, Guiscafré H, Gutiérrez G. [Strategies for improving the therapeutic patterns used in acute diarrhea in primary medical care units. IX. Analysis of the economic impact of the strategy used]. Archivos de investigación médica. 1988;19(4):427-36. [Article in Spanish]
5100001	0	0	0	3	0	0	1	0	0	0	0	0	0	1	AFRO	South Africa	0	1	0	1997	0	1	Pre-post study with randomized controls	1	0	5. Rural only	3	3680	2	no intervention	training + pamphlet for HCP + audit with feedback + supervision + pre-packaged drugs + structured stock ordering + commodity supply + printed materials for patients			Harrison A, Karim SA, Floyd K, Lombard C, Lurie M, Ntuly N, Wilkinson D. Syndrome packets and health worker training improve sexually transmitted disease case management in rural South Africa: randomized controlled trial. AIDS, 2000; 14(17):2769-2779.
5900001	0	1	1	1	0	0	0	0	0	0	0	1	0	0	SEARO	Nepal	0	1	0	1994.5	0	1	Pre-post study with non-randomized controls	0	0	5. Rural only	1	210	3	no intervention	training	training + supervision		Kafle KK, Shrestha AD, Karkee SB, Yadav BP, Prasad RR, Shrestha N, Das PL, Pradhan YMS, Jha TN, Jha SS, Bhatta BR. Intervention test of training and supervision on dispensing practices. Report submitted to USAID/RPM/JSI Nepal. Kathmandu, Nepal. August 1995.	Kafle KK, Shrestha N, Karkee SB, Prasad RR, Bhuju GB, Das PL. Intervention studies on rational use of drugs in public and private sector in Nepal. Nepal Medical College Journal. 2005; 7(1): 47-50.
6100001	0	0	1	2	0	0	0	0	0	0	0	1	0	0	SEARO	Nepal	0	0	1	1996.5	0	1	Pre-post study with randomized controls	1	0	3. Urban-rural mix	1	230	4	no intervention	printed STG + poster for HCP + printed literature for HCP + benchmarking + audit with feedback	training + printed STG + poster for HCP	training + printed STG + poster for HCP + benchmarking + audit with feedback	Kafle KK, Karkee SB, Shrestha N, Prasad RR, Bhuju GB, Das PL, Shrestha AD, Ross-Degnan D. Improving private drug sellers' practices for managing common health problems in Nepal. Journal of Nepal Health Research Council. 2013; 11(24):198-204.	Kafle KK, Shrestha AD, Karkee SB, Das PL, Shrestha N, Prasad RR, Pradhan YMS, Quick JD, Ross-Degnan D, Shrestha BR, Baniya R, Adhikary R, Singh KK, Bhandari R, Lamichhane R, Lamichhane A, Upadhyaya S. Impact of action-oriented training and/or mailed print material on retailer practices: safe dispensing, correct advice, and appropriate referral for diarrhoea, ARI, and pregnancy. Unpublished report…	Kafle KK, Shrestha N, Karkee SB, Prasad RR, Bhuju GB, Das PL. Intervention studies on rational use of drugs in public and private sector in Nepal. Nepal Medical College Journal. 2005; 7(1): 47-50.
6300001	0	1	1	1	0	0	0	0	0	0	0	0	0	1	AFRO	Uganda	0	1	0	1994	0	0	Pre-post study with non-randomized controls	0	0	5. Rural only	1	180	4	no intervention	training + printed STG + benchmarking + audit with feedback + supervision	training + printed STG + audit with feedback	printed STG	Kafuko JM, Zirabamuzaale C, Bagenda D. Rational drug use in rural health units of Uganda: effect of national standard treatment guidelines on rational drug use. International Conferences on Improving Use of Medicines, Chiang Mai, Thailand, 1997. (accessed on July 20, 2006: http://mednet3.who.int/icium/icium1997/posters/2f3_text.html)
9190101	0	1	0	1	1	0	1	0	0	0	0	0	1	0	AMRO	Guatemala	1	0	0	1991.5	0	1	Pre-post study with non-randomized controls	0	0	5. Rural only	2	1060	3	no intervention	training + printed STG	training + printed STG + poster for HCP + monitoring + supervision + HF infrastructure improvement		Bailey PE, Szaszdi JA, Schieber B. Analysis of the Vital Events Reporting System of the Maternal and Neonatal Health Project, Quetzaltenango, Guatemala. Technical Working Paper 3. December 1994. Working Paper prepared for USAID, Contract No. DPE 5966-Z-00-8083-00. available at: http://pdf.usaid.gov/pdf_docs/PNACE151.pdf, accessed Jan 14, 2009	MotherCare. Quetzaltenango Maternal and Neonatal Health Project. Pages 33-38. In: MotherCare, 1989-1993: country project descriptions. John Snow, Inc., USAID. September 1993. USAID Award/Agreement Number: DPE-5966-Z-00-8083-00. 57 pages.	O'Rourke K. The effect of hospital staff training on management of obstetrical patients referred by traditional birth attendants. In: MotherCare Matters Newsletter and literature review on maternal and neonatal health and nutrition, 1996;5(4):4-7.	Scheiber BA, Mejia M, Koritz S, Gonsalez C, Kwast BE. Medical audit of early neonatal deaths -- INCAP/Quetzaltenango Maternal and Neonatal Health Project. In: MotherCare Matters Newsletter and literature review on maternal and neonatal health and nutrition, 1996;5(4):7-12.	Bailey PE, Szaszdi JA, Schieber B. Analysis of the Vital Events Reporting System of the Maternal and Neonatal Health Project, Quetzaltenango, Guatemala. In: MotherCare Matters Newsletter and literature review on maternal and neonatal health and nutrition, 1996;5(4):13-22.	O'Rourke, K. The effect of hospital staff training on management of obstetrical patients referred by traditional birth attendants. International Journal of Gynecology & Obstetrics, 1995;48(Suppl):S95-S102.	Bailey PE, Szaszdi JA, Glover L. Obstetric complications: does training traditional birth attendants make a difference? Pan American Journal of Public Health, 2002;11(1):15-23.	O’Rourke K. Evaluación de un programa de capacitación de parteras tradicionales en Quetzaltenango, Guatemala. Boletín de la Oficina Sanitaria Panamericana, 1995; 119 (6): 503 - 514.	Kwast BE, Koblinsky MA. Starting maternity care programmes in developing countries to reduce maternal mortality. Contemporary Reviews in Obstetrics & Gynaecology, 1995;7(4):220-225.	Kwast BE. Building a community-based maternity program. International Journal of Gynecology & Obstetrics, 1995;48 Suppl:S67-82.	Kwast BE. Reduction of maternal and perinatal mortality in rural and peri-urban settings: what works? European Journal of Obstetrics & Gynecology and Reproductive Biology, 1996;69(1):47-53.
9600001	0	0	1	0	0	0	0	1	0	0	0	1	0	0	SEARO	Thailand	0	0	1	1991	0	1	Pre-post study with non-randomized controls	0	0	3. Urban-rural mix	2	1660	2	no intervention	training + printed STG + poster + printed job aid + peer education			Podhipak A, Varavithya W, Punyaratabandhu P, Vathanophas K, Sangchai R. Impact of an educational program on the treatment practices of diarrheal diseases among pharmacists and drugsellers. Southeast Asian Journal of Tropical Medicine and Public Health, 1993;24(1):32-39.
10100001	0	0	1	0	0	0	0	1	0	0	0	1	0	0	AFRO	Kenya	0	0	1	1992	0	1	Pre-post study with non-randomized controls	0	0	3. Urban-rural mix	1	330	2	no intervention	training + pamphlet for HCP + poster for HCP + printed materials for patients			Goel P, Makhulo J, Mwangi G. Working with pharmacists in Kenya. Dialogue on Diarrhoea [Internet]. 1993 Dec - 1994 Feb [cited 2008 Dec 11]; 55:4. Appropriate Health Resources and Technologies Action Group, London, UK. Available from: http://www.diarrhoea.org/dd/pdf/dd55.pdf.	Ross Degnan D, Soumerai SB, Goel PK, Bates J, Makhulo J, Dondi N, Sutoto, Adi D, Ferraz-Tabor L, Hogan R. The impact of face-to-face educational outreach on diarrhea treatment in pharmacies. Health Policy and Planning, 1996; 11(3):308-318.	Goel PK, Ross-Degnan D, McLaughlin TJ, Soumerai SB. Influence of location and staff knowledge on quality of retail pharmacy prescribing for childhood diarrhea in Kenya. International Journal for Quality in Health Care. 1996;8(6):519-26.
10100002	0	0	1	3	0	0	0	1	0	0	0	1	0	0	SEARO	Indonesia	0	0	1	1992	0	1	Pre-post study with randomized controls	1	0	1. Urban +/- periurban	2	680	2	no intervention	training + poster for HCP + printed job aid + printed materials for patients			Ross Degnan D, Soumerai SB, Goel PK, Bates J, Makhulo J, Dondi N, Sutoto, Adi D, Ferraz-Tabor L, Hogan R. The impact of face-to-face educational outreach on diarrhea treatment in pharmacies. Health Policy and Planning, 1996; 11(3):308-318.
10200001	0	1	0	1	1	0	0	0	0	0	0	0	0	0	AMRO	Trinidad and Tobago	0	1	0	1994.5	0	1	Pre-post study with non-randomized controls	0	0	3. Urban-rural mix	3	3890	2	no intervention	training + printed STG + printed literature for HCP + HCP non-financial incentive			de Negri B, DiPrete Brown L, Hernandez O, Rosenbaum J, Roter D. Improving interpersonal communication between health care providers and clients. Quality Assurance Methodology Refinement Series. Bethesda, MD: Quality Assurance Project. Part 2: Case studies; p. 27-F-33.	de Negri B, DiPrete Brown L, Hernandez O, Rosenbaum J, Roter D. Improving interpersonal communication between health care providers and clients. Quality Assurance Methodology Refinement Series. Bethesda, MD: Quality Assurance Project. Part 1: A conceptual framework for interpersonal communication; p. 5-26.	Roter D, Rosenbaum J, de Negri B, Renaud D, DiPrete-Brown L, Hernandez O. The effects of a continuing medical education programme in interpersonal communication skills on doctor practice and patient satisfaction in Trinidad and Tobago. Medical Education, 1998; 32:181-189.
10300001	0	1	0	2	1	0	0	0	0	0	0	0	0	0	SEARO	Thailand	0	1	0	1987.5	0	1	Pre-post study with randomized controls	1	0	1. Urban +/- periurban	2	1160	2	no intervention	training + audit with feedback + peer review			Ruangkanchanasetr, S. Laboratory investigation utilization in pediatric out-patient department Ramathibodi Hospital. J Med Assoc Thai, 1993; 76(Suppl 2): 194-208.
10300002	0	1	0	2	1	0	0	0	0	0	0	0	0	0	SEARO	Thailand	0	1	0	1987.5	0	1	Pre-post study with randomized controls	1	0	1. Urban +/- periurban	2	1160	2	no intervention	training + audit with feedback			Ruangkanchanasetr, S. Laboratory investigation utilization in pediatric out-patient department Ramathibodi Hospital. J Med Assoc Thai, 1993; 76(Suppl 2): 194-208.
12000001	0	1	0	1	1	0	0	0	1	0	0	0	0	0	SEARO	Indonesia	0	1	0	1994	0	0	Pre-post study with randomized controls	1	0	6. Unclear or not stated	2	890	2	no intervention	training + supervision			Widyastuti S, Dwiprahasto I, Andajaningsih, Bakri Z. The impact of problem-based rational drug use training on prescribing practices, cost reallocations and savings in primary care facilities. Poster presented at International Conferences on Improving Use of Medicines (ICIUM), Chiang Mai, Thailand, 1997. Available on the web at: http://mednet3.who.int/icium/icium1997/posters/2b4_text.html, access…
13500001	0	1	1	1	1	0	1	0	0	1	0	1	1	0	SEARO	India	0	1	0	2000.5	0	1	Post-only study with randomized controls	1	0	5. Rural only	1	470	2	no intervention	training + poster for HCP + printed job aid + support from community + community education meetings + home visits + printed materials for community + social marketing			Morrow A. Community-based strategies for breastfeeding promotion and support in developing countries. Geneva (Switzerland): World Health Organization; 2003. 30 p. Cooperative Agreement No. HRN-A-00-97-00007-00.	Bhandari N, Mazumder S, Bahl R, Martines J, Black RE, Bhan MK, and the Infant feeding study group. An Educational Intervention to Promote Appropriate Complementary Feeding Practices and Physical Growth in Infants and Young Children in Rural Haryana, India. Journal of Nutrition, 2004; 134: 2342-2348.	Bhandari N, Mazumder S, Bahl R, Martines J, Black RE, Khan MK, and other members of the Infant Feeding Study Group. Use of multiple opportunities for improving feeding practices in under-twos within child health programmes. Health Policy and Planning, 2005;20(5):328-36.	Bhandari N, Bahl R, Mazumdar S, Martines J, Black RE, Bhan MK, and the other members of the Infant Feeding Study Group. Effect of community-based promotion of exclusive breastfeeding on diarrhoeal illness and growth: a cluster randomised controlled trial. Lancet, 2003;361(9367):1418-23.
16100001	0	0	0	3	1	0	0	0	0	0	0	0	0	0	EMRO	Iran (Islamic Republic of)	0	1	0	2002	0	1	Pre-post study with randomized controls	1	0	3. Urban-rural mix	2	1690	2	no intervention	training			Mohagheghi MA, Mosavi-Jarrahi A, Khatemi-Moghaddam M, Afhami A, Khodi S, Azemoodeh O. Community-based outpatient practice of antibiotics use in Tehran. Pharmacoepidemiology and Drug Safety, 2005; 14: 135-38.
16600001	0	1	0	2	1	0	1	1	0	1	0	1	1	1	AMRO	Peru	0	1	0	2000	0	1	Post-only study with randomized controls	1	0	2. Periurban only	2	1950	2	no intervention	training + printed recording form + HCP printed flipchart + comm education group meeting + comm education printed materials + accreditation + integration of services + problem solving meetings			Penny ME, Creed-Kanashira HM, Robert RC, Narro MR, Caulfield LE, Black RE. Effectiveness of an educational intervention delivered through the health services to improve nutrition in young children: a cluster-randomised controlled trial. The Lancet, 2005; 365: 1863-1872.	Waters HR, Penny ME, Creed-Kanashiro HM, Robert RC, Narro R, Willis J, Caulfield LE, Black RE. The cost-effectiveness of a child nutrition education programme in Peru. Health Policy Plan. 2006;21(4):257-264.	Robert RC, Gittelsohn J, Creed-Kanashiro HM, Penny ME, Caulfield LE, Narro MR, Black RE. Process evaluation determines the pathway of success for a health center-delivered, nutrition education intervention for infants in Trujillo, Peru. The Journal of Nutrition. 2006;136(3):634-41.	Robert RC, Gittelsohn J, Creed-Kanashiro HM, Penny ME, Caulfield LE, Narro MR, Steckler A, Black RE. Implementation examined in a health center-delivered, educational intervention that improved infant growth in Trujillo, Peru: successes and challenges. Health Education Research. 2007;22(3):318-31.
27600001	0	1	0	1	0	0	1	0	0	0	0	0	0	0	AFRO	Mali	0	1	0	2001	0	1	Post-only study with randomized controls	1	0	4. Town +/- rural	1	240	2	no intervention	training + poster for HCP + supervision			Winch PJ, Bagayoko A, Diawara A, Kané M, Thiéro F, Gilroy K, Daou Z, Berthé Z, Swedberg E. Increases in correct administration of chloroquine in the home and referral of sick children to health facilities through a community-based intervention in Bougouni District, Mali. Transactions of the Royal Society of Tropical Medicine & Hygiene, 2003;97(5):481-490.	Gilroy K, Winch PJ, Diawara A, Swedburg E, Thiéro F, Kané M, Daou Z, Berthé Z, Bagayoko A. Impact of IMCI training and language used by provider on quality of counseling provided to parents of sick children in Bougouni District, Mali. Patient Education and Counseling, 2004;54:35-44.
28600001	0	1	0	0	0	0	0	0	1	0	0	1	0	0	SEARO	Nepal	0	1	0	1995.5	0	1	Pre-post study with non-randomized controls	0	0	5. Rural only	1	220	2	no intervention	training			Baral JP, Bhattarai S, Thapa MR, Ghimire K, Burathoki K. Effectiveness of training of basic health workers in leprosy control programme. Indian Journal of Leprosy, 1998; 70(suppl): 23S-31S.
28600002	0	0	0	0	0	0	0	0	0	0	0	0	1	0	SEARO	Nepal	0	0	1	1995.5	0	1	Pre-post study with non-randomized controls	0	0	5. Rural only	1	220	2	no intervention	training			Baral JP, Bhattarai S, Thapa MR, Ghimire K, Burathoki K. Effectiveness of training of basic health workers in leprosy control programme. Indian Journal of Leprosy, 1998; 70(supplement): 23S-31S.
28700001	0	1	1	2	1	0	1	0	1	1	0	0	0	0	AFRO	Nigeria	1	1	0	1999.5	0	1	Pre-post study with randomized controls	1	0	3. Urban-rural mix	1	270	2	no intervention	training			Bawa SB, Olumide EAA. The effect of training on the reporting of notifiable diseases among health workers in Yobe State, Nigeria. The Nigerian Postgraduate Medical Journal, 2005; 12(1):1-5.	Bawa SB, Olumide EAA, Umar US. The knowledge, attitude and practices of the reporting of notifiable diseases among health workers in Yobe State, Nigeria. African Journal of Medicine and Medical Sciences, 2003; 32(1):49-53.
33600001	0	0	0	0	0	0	0	0	1	0	0	0	0	0	AMRO	Mexico	0	0	1	2000.5	0	1	Pre-post study with non-randomized controls	0	0	1. Urban +/- periurban	3	6180	2	no intervention	training			Arreola-Risa C, Mock C, Herrera-Escamilla AJ, Contreras I, Vargas J. Cost-effectiveness and benefit of alternatives to improve training for prehospital trauma care in Mexico. Prehospital and Disaster Medicine, 2004;19(4):318-325.	Arreola-Risa C, Mock CN, Lojero-Wheatly L, de la Cruz O, Garcia C, Canavati-Ayub F, Jurkovich GJ. Low-cost Improvements in Prehospital Trauma Care in a Latin American City. The Journal of Trauma: Injury, Infection, and Critical Care, 2000; 48(1): 119-124.
36400001	1	0	0	3	1	0	1	0	0	0	0	0	0	0	SEARO	Thailand	1	0	0	1977	0	1	Post-only study with randomized controls	1	0	5. Rural only	2	450	2	no intervention	training			Dusitsin N, Varakamin S, Ningsanon P, Chalapati S, Boonsiri B, Gray RH. Post-partum tubal ligation by nurse-midwives and doctors in Thailand. Lancet, 1980;1(8169):638-639.
39300001	0	1	0	2	0	0	1	0	0	0	0	0	0	0	WPRO	China	1	1	0	2000.5	1	1	Pre-post study with randomized controls	1	0	1. Urban +/- periurban	2	1000	2	no intervention	training			Huang J, Jiang D, Wang X, Liu Y, Fennie K, Burgess J, Williams AB. Changing knowledge , behavior, and practice related to universal precautions among hospital nurses in China. The Journal of Continuing Education in Nursing, 2002; 33(5):217-224.
46600001	0	1	0	0	0	0	1	0	0	0	0	0	0	0	EURO	Turkey	1	0	0	1991	0	1	Pre-post study with non-randomized controls	0	0	1. Urban +/- periurban	3	2590	2	no intervention	training			Oz F. Impact of training on empathetic communication skills and tendency of nurses. Clinical Excellence for Nurse Practitioners, 2001; 5(1): 44-51.
47600001	0	0	1	2	0	0	0	1	0	0	0	1	0	0	SEARO	Thailand	0	0	1	2000.5	0	1	Pre-post study with randomized controls	1	0	1. Urban +/- periurban	2	1900	2	no intervention	training + printed STG + supervision			Ratanajamit C, Chongsuvivatwong V, Geater AF. A randomized controlled educational intervention on emergency contraception among drugstore personnel in southern Thailand. J Am Med Womens Assoc. 2002; 57(4): 196-9, 207.
48400001	0	1	0	1	1	0	0	0	1	0	0	1	1	0	EMRO	Pakistan	0	1	0	2000	0	1	Pre-post study with non-randomized controls	0	0	5. Rural only	1	470	2	no intervention	training + supervision			Ramarao S, Mir AM. Transforming relationships in Pakistani villages. Quality / Calidad / Qualité. 2004; 15: 20-34.	Sathar Z, Jain A, Ramarao S, ul Haque M, Kim J. Introducing client-centered reproductive health services in a Pakistani setting. Studies in Family Planning. 2005; 36(3): 221-234.
49600001	0	0	0	0	0	0	1	0	0	0	0	0	1	0	WPRO	Philippines	0	0	1	1995	0	1	Pre-post study with randomized controls	1	0	3. Urban-rural mix	2	1030	2	large group training	small group training			Singhal N, McMillan DD, Cristobal FL, Arciaga RS, Hocson W, Franco J, Farrales R, Famor L. Problem-based teaching of birth attendants in the Philippines. Health Care for Women International, 2001;22:569-583.
54400001	0	1	1	0	1	0	1	0	0	0	0	0	0	0	AMRO	Brazil	1	0	0	1997.5	0	1	Pre-post study with non-randomized controls	0	0	6. Unclear or not stated	2	4870	2	training + printed literature for HCP + problem solving meetings + equipment	self-study materials for HCP + printed literature for HCP + problem solving meetings + equipment			Vidal SA, Ronfani L, da Mota Silveira S, Mello MJ, dos Santos ER, Buzzetti R, Cattaneo A. Comparison of two training strategies for essential newborn care in Brazil. Bulletin of the World Health Organization, 2001;79(11):1024-31.
59800001	0	0	1	1	1	0	0	0	0	0	0	1	0	0	WPRO	Cambodia	0	1	0	1996	0	1	Pre-post study with non-randomized controls	0	0	5. Rural only	1	310	2	poster for HCP and community + drug supply	educational video for HCP (considered training) and community + poster for HCP & community + drug supply			Denis MB. Improving compliance with quinine + tetracycline for treatment of malaria: evaluation of health education interventions in Cambodian villages. Bulletin of the World Health Organization. 1998; 76(Suppl. 1): 43-49.
60100001	0	0	1	0	0	0	0	0	0	0	0	1	0	0	AFRO	Kenya	0	0	1	1998.5	0	1	Pre-post study with non-randomized controls	0	0	5. Rural only	1	440	2	no intervention	training + printed STG + monitoring + public-private partnership + accreditation			Marsh VM. Implementation and evaluation of a shopkeeper training programme to optimise the home use of shop-bought antimalarial drugs for uncomplicated fevers in coastal Kenya. Department for International Development, UK. Final report 1 February 2002. Project No.: R7179.	Antimalarial Drug Retailer Training Programme: A manual for training drug retailers on over-the-counter drugs for childhood fevers. Kenya; 2001. KEMRI Wellcome Trust.	Marsh VM, Mutemi WM, Willetts A, Bayah K, Were S, Ross A, Marsh K. Improving malaria home treatment by training drug retailers in rural Kenya. Tropical Medicine and International Health. 2004; 9(4): 451-460.	Goodman CA, Mutemi WM, Baya EK, Willetts A, Marsh V. The cost-effectiveness of improving malaria home management: shopkeeper training in rural Kenya. Health Policy and Planning. 2006; 21(4): 275-288.
60500001	0	0	1	1	0	1	1	0	0	0	0	1	0	0	AFRO	Uganda	0	0	1	2000.5	0	1	Pre-post study with non-randomized controls	0	0	1. Urban +/- periurban	1	240	2	no intervention	training + pamphlet for HCP + printed STG + poster for HCP + printed materials for patients			Tumwikirize WA, Ekwaru JP, Mohammed K, Ogwal-Okeng JW, Aupont O. Impact of a face-to-face educational intervention on improving the management of ARI in private pharmacies and drug shops in Uganda. Presented at: The Second International Conference on Improving Use of Medicines (ICIUM) 2004; 2004 March 30 - April 2 [cited 2010 April 9]; Chiang Mai, Thailand. Available from: http://www.icium.org/ic…	Tumwikirize WA, Ekwaru PJ, Mohammed K, Ogwal-Okeng JW, Aupont O. Impact of a face-to-face educational intervention on improving the management of acute respiratory infections in private pharmacies and drug shops in Uganda. East African Medical Journal. 2004; 81(2 Suppl): S25-S32.	Tumwikirize WA, Ekwaru PJ, Mohammed K, Ogwal-Okeng JW, Aupont O. Management of acute respiratory infections in drug shops and private pharmacies in Uganda: a study of counter attendants' knowledge and reported behaviour. East African Medical Journal. 2004; 81(2 Suppl): S33-S40.
62100001	0	1	0	2	0	0	1	0	0	0	0	0	0	0	SEARO	Thailand	0	1	0	2001	0	1	Pre-post study with randomized controls	1	0	5. Rural only	2	1900	2	no intervention	training + printed STG + supervision			Pagaiya N, Garner P. Primary care nurses using guidelines in Thailand: a randomized controlled trial. Tropical Medicine and International Health, 2005;10(5):471-477.
63000001	0	0	1	0	1	0	0	0	0	0	0	0	0	0	AFRO	Uganda	0	1	0	2001	0	1	Pre-post study with non-randomized controls	0	0	1. Urban +/- periurban	1	240	2	no intervention	training + printed STG + poster for HCP + audit with feedback + problem solving meetings			Obua C, Ogwal-Okeng JW, Waako P, Aupont O, Ross-Degnan D. Impact of an educational intervention to improve prescribing by private physicians in Uganda. East African Medical Journal. 2004 Feb;Suppl: S17-S24.
63100001	0	1	0	0	1	1	1	0	0	0	0	1	0	0	AFRO	Zambia	0	1	0	1994.5	1	1	Pre-post study with non-randomized controls	0	0	1. Urban +/- periurban	1	350	2	no intervention	training			Faxelid E, Ahlberg M, Freudenthal S, Ndulo J, Krantz I. Quality of STD care in Zambia. Impact of training in STD management. International Journal for Quality in Health Care. 1997; 9(5): 361-366
67100001	0	1	0	3	0	0	1	0	1	0	0	1	0	0	AMRO	Brazil	0	1	0	1996	0	1	Pre-post study with randomized controls	1	0	1. Urban +/- periurban	2	4460	2	no intervention	training			Rea MF, Venancio SI, Martines JC, Savage F. Counselling on breastfeeding: assessing knowledge and skills. Bulletin of the World Health Organization, 1999; 77(6): 492-498.
67200001	0	0	0	2	0	0	1	0	0	0	0	0	0	0	AFRO	South Africa	0	1	0	1997	0	1	Pre-post study with randomized controls	1	0	6. Unclear or not stated	3	3680	2	no intervention	training			Meyer JC, Summers RS, Moller H. Randomized, controlled trial of prescribing training in a South African province. Medical Education, 2001(9); 35: 833-840.
68390101	0	1	0	1	1	0	1	0	0	0	0	0	0	0	WPRO	Philippines	0	1	0	1997	0	1	Pre-post study with randomized controls	1	0	5. Rural only	2	1230	2	no intervention	in-service training + supervision			Costello M, Lacuesta M, RamaRao S, Jain A. A client-centered approach to family planning: the Davao Project. Studies in Family Planning. 2001; 32(4):302-14.	Jain A, RamaRao S, Kim J, Costello M. Evaluation of an intervention to improve quality of care in family planning programme in the Philippines. Journal of Biosocial Science. 2012; 44(1):27-41.
68800001	0	1	1	0	1	0	1	0	0	0	0	0	0	0	SEARO	Indonesia	0	1	0	1997	1	1	Pre-post study with non-randomized controls	0	0	1. Urban +/- periurban	2	1110	2	no intervention	academic detailing + poster for HCP + printed job aid			Mukti AG, Treloar C, Suprawimbarti, Asdie AH, D'Este K, Higginbotham N, Heller R. A universal precautions education intervention for health workers in Sardjito and Pku Hospital, Indonesia. Southeast Asia Journal of Tropical Medicine and Public Health. 2000; 31(2): 405-411.
68900001	0	1	0	0	1	0	1	0	0	0	0	0	0	0	SEARO	Thailand	0	1	0	1997.5	1	1	Pre-post study with non-randomized controls	0	0	5. Rural only	2	2070	2	no intervention	training			Lueveswanij S, Nittayananta W, Robison VA. Changing knowledge, attitudes, and practices of Thai oral health personnel with regard to AIDS: an evaluation of an educational intervention. Community Dental Health. 2000; 17:165-171.
69200001	0	1	1	2	0	0	0	0	0	0	0	0	0	1	AMRO	Peru	0	1	0	1997.5	0	1	Pre-post study with randomized controls	1	0	3. Urban-rural mix	2	2110	3	no intervention	training (6 modules)	training (8 modules)		Johnson KW, Young LC, Bryant D, Suresh G, Bettler RF (Pacific Institute for Research and Evaluation- Louisville Center), Berbaum ML (Health Research and Policy Centers, University of Illinois at Chicago). The Daytop drug-free treatment training evaluation. Research Monograph. Washington DC. Bureau for International Narcotics and Law Enforcement Affairs, Department of State. July 2000. 77p.	Johnson KW, Young LC, Suresh G, Berbaum ML. Drug abuse treatment training in Peru. A social policy experiment. Evaluation Review. 2002; 26(5): 480-519
77000001	0	1	0	3	1	0	1	0	0	0	0	1	0	1	EMRO	Sudan	0	1	0	1988	0	1	Post-only study with randomized controls	1	0	1. Urban +/- periurban	1	790	2	vaccination gate keeper + improved vaccine accessibility	training + vaccination gate keeper + improved vaccine utilization			Loevinsohn BP, Gareaballah E. Missed opportunities for immunization during visits for curative care: a randomized cross-over trial in Sudan. Bulletin of the World Health Organization. 1992; 70(3): 335-339.
96600001	0	1	0	2	1	0	0	0	0	0	0	0	0	0	EMRO	Egypt	1	1	0	1990	0	1	Post-only study with randomized controls	1	0	3. Urban-rural mix	2	750	2	equipment	training + equipment			Gadomski AM, Khallaf N, El Ansary S, Black RE. Assessment of respiratory rate and chest indrawing in children with ARI by primary care physicians in Egypt. Bulletin of the World Health Organization. 1993; 71(5): 523-527.
99900001	0	0	1	2	0	0	0	1	0	0	0	1	0	0	AMRO	Peru	0	0	1	1995.5	1	1	Post-only study with randomized controls	1	0	1. Urban +/- periurban	2	2080	2	no intervention	training + printed STG + poster for HCP and patient + printed material for patients			Garcia PJ, Gotuzzo E, Hughes JP, Holmes KK. Syndromic management of STDs in pharmacies: evaluation and randomised intervention trial. Sexually Transmitted Infections. 1998;74 Suppl 1:S153-8.
100300001	0	0	0	2	0	0	1	0	0	0	0	0	0	0	AFRO	Togo	0	1	0	1991.5	0	1	Interrupted time series with randomized controls	1	0	3. Urban-rural mix	1	410	2	no intervention	training + supervision + one-on-one patient education meetings			Huntington D, Apologan A. The integration of family planning and childhood immunization services in Togo. Studies in Family Planning, 1994; 25(3): 176-183.
103400001	0	1	0	0	1	0	0	0	0	0	0	0	0	0	WPRO	China	1	0	0	2000.5	0	1	Pre-post study with non-randomized controls	0	0	1. Urban +/- periurban	2	1000	2	no intervention	training + printed STG + monitoring + supervision			Wang Y, Wang L, Xu Y, Wang S, Wang J, Jiang P, Li F, Shi H, Wang H, Zhang J, Chen L, Liu J, Wang Q. Study on intervention and comparison of rational use of antibiotics on perioperative period of clean incision and clean-defiled incision. Zhonghua Liu Xing Bing Xue Za Zhi, 2002;23(4):301-3.
104200001	0	1	0	1	0	0	1	0	0	0	0	1	0	0	AFRO	Kenya	0	1	0	1999.5	0	1	Pre-post study with randomized controls	1	0	3. Urban-rural mix	1	420	3	1.5-day training + peer education + printed STG + printed literature for HCP	2-day training + peer education + printed STG + printed literature for HCP	2-day training + peer education + printed STG + printed literature for HCP + supervision		Stanback J, Griffey Brechin SJ, Lynam P, Toroitich-Ruto C, Smith T, and the Kenya Guidelines Update Evaluation Study Group. Final Report: The Effectiveness of National Dissemination of Updated Reproductive Health / Family Planning Guidelines in Kenya. August 2001.	Stanback J, Griffey S, Lynam P, Ruto C, Cummings S. Improving adherence to family planning guidelines in Kenya: an experiment. International Journal for Quality in Health Care, 2007;19(2):68-73.
104800001	0	1	0	3	1	0	1	0	0	0	0	0	0	0	AMRO	Argentina, Uruguay	1	0	0	2004	0	1	Pre-post study with randomized controls	1	0	1. Urban +/- periurban	3	3870	3	no intervention	training + academic detailing + printed recording form + printed STG + poster for HCP + printed job aid + team-based problem solving + audit with feedback + group process + electronic literature for HCP			Althabe F, Buekens P, Bergel E, Belizán JM, Campbell MK, Moss N, Hartwell T, Wright LL, for the Guidelines Trial Group. A behavioral intervention to improve obstetrical care. New England Journal of Medicine, 2008;358(18):1929-40.
108100001	0	0	0	1	0	0	0	0	0	0	1	0	0	0	WPRO	China	0	0	1	2000.5	1	1	Pre-post study with randomized controls	1	0	1. Urban +/- periurban	2	1000	2	no intervention	training			Wang H, Fennie K, He G, Burgess J, Williams AB. A training programme for prevention of occupational exposure to bloodborne pathogens: impact on knowledge, behaviour and incidence of needle stick injuries among student nurses in Changsha, People's Republic of China. Journal of Advanced Nursing, 2003; 41(2): 187-194.
110700001	0	0	1	1	0	0	0	1	0	0	0	1	0	0	AMRO	Peru	0	0	1	1998.5	1	1	Post-only study with randomized controls	1	0	1. Urban +/- periurban	2	1990	2	training on diarrhea (placebo)	training on STD + newsletter for HCP + printed STG + poster for HCP + supervision + commodity supply + printed materials for patients + social marketing + accreditation + referral network between physicians and pharmacies			Adams EJ, Garcia PJ, Garnett GP, Edmunds WJ, Holmes KK.The cost-effectiveness of syndromic management in pharmacies in Lima, Peru. Sexually Transmitted Diseases. 2003 May; 30(5): 379-387	Garcia P, Hughes J, Carcamo C, Holmes KK. Training pharmacy workers in recognition, management, and prevention of STDs: district-randomized controlled trial. Bulletin of the World Health Organization. 2003;81(11):806-814
110700002	0	0	1	3	0	0	0	1	0	0	0	1	0	0	AMRO	Peru	0	0	1	1998.5	1	1	Post-only study with randomized controls	1	0	1. Urban +/- periurban	2	1990	2	training on diarrhea (placebo)	training on STD + newsletter for HCP + printed STG + poster for HCP + supervision + commodity supply + printed materials for patients + social marketing + accreditation + referral network between physicians and pharmacies			Adams EJ, Garcia PJ, Garnett GP, Edmunds WJ, Holmes KK.The cost-effectiveness of syndromic management in pharmacies in Lima, Peru. Sexually Transmitted Diseases. 2003 May;30(5):379-387	Garcia P, Hughes J, Carcamo C, Holmes KK. Training pharmacy workers in recognition, management, and prevention of STDs: district-randomized controlled trial. Bulletin of the World Health Organization. 2003;81(11):806-814
114500001	0	1	0	0	1	0	1	0	0	0	0	0	0	0	EMRO	Egypt	1	0	0	1994	0	1	Interrupted time series with no controls	0	1	1. Urban +/- periurban	2	830	1	training + supervision + equipment				Huntington D, Hassan EO, Attallah N, Toubia N, Naguib M, Nawar L. Improving the medical care and counseling of postabortion patients in Egypt. Studies in Family Planning. 1995; 26(6): 350-362.
115000001	0	1	0	2	1	0	1	0	0	1	0	1	1	0	AMRO	Guatemala	0	1	0	2000	0	0	Interrupted time series with randomized controls	1	0	3. Urban-rural mix	2	1730	2	no intervention	training + printed STG + printed job aid + supervision + printed materials for community			Jacobs E, Brambila C, Vernon R. Reproductive health care in the postnatal period in Guatemala. Population Council. August 5, 2002.
115200001	0	1	0	0	1	0	0	0	0	1	0	0	0	0	AMRO	Guatemala	0	1	0	2001.5	0	0	Interrupted time series with no controls	0	1	1. Urban +/- periurban	2	1680	1	training + printed recording form + printed STG + poster for HCP + printed job aid + supervision + printed materials for patients				León FR, Brambila C, de la Cruz M, Bratt J, Gutiérrez G, Dávila V, Bonatto C, Ríos A. Effects of IGSS’ Job Aids-Assisted Balanced Counseling Algorithms on quality of care and client outcomes. 2003[cited 2012 Feb 13]. 64p.The study was funded by the U.S. Agency for International Development under the terms of Cooperative Agreement No.: HRN-A-00-98-00012-00 and In-house Project No.: 8002 13052. Ava…
116600001	0	0	0	3	0	0	0	0	0	0	0	0	0	1	AFRO	Kenya	0	1	0	2005	0	0	Pre-post study with randomized controls	1	0	6. Unclear or not stated	1	520	2	training (standard) + printed STG	training (computer) + printed STG + electronic literature for HCP			Quality Assurance Project. Evaluation of an IMCI computer-based training course in Kenya. Operations Research Results. Published for the U.S. Agency for International Development (USAID) by the Quality Assurance Project (QAP), Bethesda, MD. 2006.
116700001	0	1	1	3	1	0	1	0	0	0	0	0	0	0	AFRO	Uganda	0	1	0	1999.5	0	0	Pre-post study with randomized controls	1	0	3. Urban-rural mix	1	260	2	training (standard) + printed STG	training (computer) + printed STG			Tavrow P, Kekitiinwa Rukyalekere A, Maganda A, Ndeezi G, Sebina-Zziwa A, Knebel E. A comparison of computer-based and standard training in the Integrated Management of Childhood Illness in Uganda. Operations Research Results, 2002; 2(5). Bethesda, MD: Published for the U.S. Agency for International Development (USAID) by the Quality Assurance (QA) Project.
118600001	0	1	0	3	1	0	1	0	0	1	0	0	0	0	EMRO	Egypt	0	1	0	2001.5	0	1	Interrupted time series with randomized controls	1	0	3. Urban-rural mix	2	1410	2	no intervention	training + printed STG + supervision + continuous quality improvement + self-assessment + group process + printed materials for patients + performance-based non-financial incentive			Nawar L, Kharboush I (Frontiers in Reproductive Health Program), Ibrahim MA, Makhlouf (Cairo Demographic Center), Adamchak S (Frontiers in Reproductive Health Program Family Health International). Impact of improved client-provider interaction on women's achievement of fertility goals in Egypt. US Agency for International Development. December 2004 [cited 28 February, 2011]. 45p. Cooperative Agre…	Social Planning, Analysis and Administration Consultants (SPAAC). Impact of improved client-provider interaction on women’s achievement of fertility goals, summary of the intervention. FRONTIERS Report. Washington, DC: Population Council, October 2002. 12p. US Agency for International Development. Cooperative Agreement No.: HRN-A-00-98-00012-00, Sub-project No.: 5800.13038.	Social Planning, Analysis and Administration Consultants (SPAAC). Impact of improved client-provider interaction on women’s achievement of fertility goals, summary of key findings. FRONTIERS Report. Washington, DC: Population Council. October 2002. 14p. US Agency for International Development. Cooperative Agreement No.: HRN-A-00-98-00012-00, Sub-project No.: 5800.13038.	Abdel-Tawab N, Rao SR. Do improvements in client–provider interaction increase contraceptive continuation? Unraveling the puzzle. Patient Education and Counseling. 2010;81:381-387.
119000001	0	1	0	1	1	0	1	0	0	0	0	1	0	0	AFRO	Ghana	1	1	0	2003	0	0	Pre-post study with non-randomized controls	0	0	3. Urban-rural mix	1	320	2	training (classroom) + printed literature for HCP + team-based problem solving + supervision + HCP job description + equipment + strengthen data collection	training (self-directed) + printed literature for HCP + team-based problem solving + supervision + HCP job description + equipment + strengthen data collection			Osei I, Garshong B, Banahene GO, Gyapong J, Tapsoba P, Askew I, Ahiadeke C, Killian R, Bonku E, Combary P, Sampson W. Improving the Ghanaian Safe Motherhood Programme. Evaluating the effectiveness of alternative training models and other performance improvement factors on the quality of maternal care and client outcomes. Health Research Unit, Ghana Health Services, Frontiers Program, Population C…
119100001	0	1	1	0	1	0	1	0	0	0	0	0	0	0	AMRO	Dominican Republic	0	1	0	1999.5	1	0	Pre-post study with non-randomized controls	0	0	3. Urban-rural mix	2	2600	3	no intervention	pamphlet for HCP + printed STG + poster for HCP and patient + grp process + drug supply + med info mgmt system + printed materials for patients + redress mechanism	training + pamphlet HCP + printed STG + poster HCP & patient + supervision + grp process + drug supply + med info mgmt system + printed materials for patients + redress mechanism		Luoma M, Jaskiewicz W, McCaffery J, Catotti DN. Dominican Republic performance improvement project evaluation. Chapel Hill, North Carolina: INTRAH. January, 2000. 124p. Basic funding provided by the United States Agency for International Development. Contract No.: CCP-C-00-95-0005-00	Padilla MB, Fort A. Results of the second follow-up study of the Dominican Republic performance improvement project evaluation. Chapel Hill, North Carolina: Intrah, PRIME II Project. November, 2001. 35p. Basic funding provided by the Center for Population, Health and Nutrition, Global Bureau, United States Agency for International Development. Technical Report No.:28. Grant No.: HRN-A-00-99-00022…	Catotti DN. Improving the quality and availability of reproductive health services: humanized care in the Dominican Social Security Institute: a prime performance improvement project. PRIME Fact Sheet. Chapel Hill, North Carolina: intrah. 1- 4.
131800001	0	1	0	1	1	0	1	0	1	1	0	0	0	0	AFRO	Zambia	0	1	0	2006	0	0	Post-only study with randomized controls	1	0	3. Urban-rural mix	1	620	2	training (standard)	training (shortened)			Mwinga K, Siziya S, Kasungami D, Kalesha P, Tambatamba B. Research Study Report: Comparative study of Integrated Management of Childhood Illness (IMCI) case management skills of primary health care workers trained in eleven-day standard course and six-day abridged course for physicians. Zambian Ministry of Health. 2006.
132600001	0	1	0	0	0	0	0	0	1	0	0	0	0	0	SEARO	Nepal	0	1	0	2000.5	0	1	Pre-post study with randomized controls	1	0	5. Rural only	1	240	3	no intervention	training + printed STG + poster for HCP + printed literature for HCP	training + printed STG + poster for HCP + printed literature for HCP + self-assessment with group process		Kafle KK, Shrestha AD, Shrestha N, Prasad RR, Das PL, Bhuju GB. Test of Strategies for Implementing STS in Improving Use of Drugs. INRUD, Nepal; New Baneswore, Kathmandu, Nepal; March, 2001	Kafle KK, Shrestha AD, Shrestha N, Prasad RR, Das PL, Bhuju GB. Test of sustainability of strategy in implementing STS for improving use of drugs. Technical Report, INRUD, Nepal, 2002. available at: http://www.inrud-nepal.org.np/publications/STS-Test%20of%20sustainability.pdf, accessed Dec 30, 2009	Kafle K, Karkee SB, Prasad RR, Bhuju GB, Shrestha N, Das PL, Shrestha AD. Evaluation of a successful intervention for sustainability and effects in post research phase. Kathmandu University Medical Journal, 2006; 4(1): 61-64.	Kafle KK, Shrestha N, Karkee SB, Prasad RR, Bhuju GB, Das PL. Intervention studies on rational use of drugs in public and private sector in Nepal. Nepal Medical College Journal, 2005; 7(1): 47-50.
133200001	0	1	0	2	1	0	0	0	0	0	0	0	0	0	EURO	Turkey	0	1	0	1999.5	0	1	Pre-post study with randomized controls	1	0	1. Urban +/- periurban	3	4190	2	no intervention	training			Akici A, Kalaca S, Ugurlu MU, Karaalp A, Cali S, Oktay S. Impact of a short postgraduate course in rational pharmacotherapy for general practitioners. British Journal of Clinical Pharmacology, 2004;57(3): 310-321
133300001	0	1	0	3	1	0	0	0	0	0	0	1	0	0	EMRO	Sudan	0	1	0	2002	0	1	Pre-post study with randomized controls	1	0	6. Unclear or not stated	1	360	4	no intervention	audit with feedback	training + printed STG + audit with feedback	academic detailing + printed STG + audit with feedback	Eltayeb IB, Awad AI, Mohamed-Salih MS, Daffa-Alla MA, Ahmed MB, Ogail MA, Matowe L. Changing the prescribing patterns of sexually transmitted infections in the White Nile Region of Sudan. Sexually Transmitted Infections, 2005; 81(5):426-427.
133400001	0	0	0	2	0	0	0	0	0	0	0	1	0	0	SEARO	Nepal	0	1	0	2002.5	0	1	Pre-post study with randomized controls	1	0	5. Rural only	1	260	2	no intervention	training + poster for HCP + printed job aid			Shrestha N, Samir KC, Baltussen R, Kafle KK, Bishai D, Niessen L. Practical approach to lung health in Nepal: better prescribing and reduction of cost. Tropical Medicine and International Health, 2006;11(5):765-772.
134500001	0	1	0	1	1	0	0	0	0	0	0	0	0	0	SEARO	India	0	1	0	2000	0	1	Pre-post study with randomized controls	1	0	1. Urban +/- periurban	1	460	2	no intervention	training + printed STG + printed literature for HCP:			Kotwani A, Gupta U, Suri JC, Chaudhury RR. Impact of educational intervention on prescribing behavior and cost of therapy in bronchial asthma in colony hospitals of Delhi. Poster presentation at 2nd ICIUM conference, Chiang Mai, Thailand, Mar 30-Apr 2, 2004. author email: anitakotwani@msn.com, available at: http://archives.who.int/icium/icium2004/resources/ppt/AD035.ppt, accessed Sept 11, 2008	Chaudhury RR, Parameswar R, Gupta U, Sharma S, Tekur U, Bapna JS. Quality medicines for the poor: experience of the Delhi programme on rational use of drugs. Health Policy and Planning, 2005 Mar; 20(2):124-36.
134800001	0	1	0	2	1	0	0	0	0	0	0	0	0	0	SEARO	India	0	1	0	2000	0	1	Pre-post study with randomized controls	1	0	1. Urban +/- periurban	1	460	2	no intervention	training + printed STG + printed literature for HCP			Dehli Society for Promotion of Rational Use of Drugs, INDIA-WHO Essential Drugs Programme. Research on Rational Drug Use in India: A Glimpse. 2001.	Euro Health Group Consultants. Final Report. Delhi Society for the Promotion of Rational Use of Drugs (DSPRUD). External evaluation of the activities in the past 5 years, New Delhi, 7-24 October 2002. January 2003.	Sharma S, Gupta U, Chaudhury RR, Bapna JS. Prescribing behaviour of physicians. Journal of Health Management, 2002; 4(1): 55-71.
134900001	0	1	0	3	1	0	0	0	0	0	0	1	0	0	EMRO	Sudan	0	1	0	2003	0	1	Pre-post study with randomized controls	1	0	3. Urban-rural mix	1	410	4	no intervention	audit with feedback	training + audit with feedback	academic detailing + audit with feedback	Awad AI, Eltayeb IB, Baraka OZ. Changing antibiotics prescribing practices in health centers of Khartoum State, Sudan. European Journal of Clinical Pharmacology, 2006; 62(2):135-142.
135000001	0	1	0	0	1	0	0	0	0	0	0	1	0	0	WPRO	Malaysia	0	1	0	2004	0	1	Pre-post study with non-randomized controls	0	0	6. Unclear or not stated	3	4700	2	no intervention	academic detailing + printed STG + poster for HCP			Teng CL, Achike FI, Phua KL, Nurjahan MI, Mastura I, Asiah HN, Mariam AM, Narayanan S, Norsiah A, Sabariah I, Shariah I, Rokiah KS, Zubaidah MA, Koh CN, Rosnah I. Modifying antibiotic prescribing: the effectiveness of academic detailing plus information leaflet in a Malaysian primary care setting. Medical Journal of Malaysia. 2006; 61(3): 323-331.
135290101	0	0	0	1	0	0	0	0	0	0	0	0	1	0	AFRO	Kenya	0	0	1	1999.5	0	1	Interrupted time series with no controls	0	1	3. Urban-rural mix	1	420	1	training (1 course) + printed recording form + printed STG + printed job aid				Olewe M, Garg R, Deming MS. Community initiatives for child survival in Siaya District, Kenya. Centers for Disease Control and Prevention, Atlanta, Georgia. 9 p.	Rowe SY, Kelly JM, Olewe MA, Kleinbaum DG, McGowan JE Jr, McFarland DA, Rochat R, Deming MS. Effect of multiple interventions on community health workers' adherence to clinical guidelines in Siaya district, Kenya. Transactions of the Royal Society of Tropical Medicine and Hygiene. 2007; 101(2): 188-202.	Rowe SY, Olewe MA, Kleinbaum DG, McGowan JE Jr, McFarland DA, Rochat R, Deming MS. Longitudinal analysis of community health workers' adherence to treatment guidelines, Siaya, Kenya, 1997-2002. Tropical Medicine and International Health. 2007; 12(5): 651-663.
135290102	0	0	0	0	0	0	0	0	0	0	0	0	1	0	AFRO	Kenya	0	0	1	1999.5	0	1	Interrupted time series with no controls	0	1	3. Urban-rural mix	1	420	1	training (2 courses) + printed recording form + printed STG + printed job aid				Olewe M, Garg R, Deming MS. Community initiatives for child survival in Siaya District, Kenya. Centers for Disease Control and Prevention, Atlanta, Georgia. 9 p.	Rowe SY, Kelly JM, Olewe MA, Kleinbaum DG, McGowan JE Jr, McFarland DA, Rochat R, Deming MS. Effect of multiple interventions on community health workers' adherence to clinical guidelines in Siaya district, Kenya. Transactions of the Royal Society of Tropical Medicine and Hygiene. 2007; 101(2): 188-202.	Rowe SY, Olewe MA, Kleinbaum DG, McGowan JE Jr, McFarland DA, Rochat R, Deming MS. Longitudinal analysis of community health workers' adherence to treatment guidelines, Siaya, Kenya, 1997-2002. Tropical Medicine and International Health. 2007; 12(5): 651-663.
135400001	0	0	1	1	0	0	0	0	0	0	0	1	0	0	EMRO	Pakistan	0	0	1	2005	0	1	Pre-post study with non-randomized controls	0	0	5. Rural only	1	710	2	no intervention	academic detailing + printed STG			Qidwai W, Krishanani MK, Hashmi S, Afridi M, Ali RA. Private drug seller's education in improving prescribing practices: Results of an interventional study from Rural Singh, Pakistan. 16 p.	Qidwai W, Krishanani MK, Hashmi S, Afridi M, Ali RA. Private drug sellers' education in improving prescribing practices. Journal of the College of Physicians and Surgeons--Pakistan. 2006;16(12):743-746.
136500001	0	0	1	3	0	0	0	1	0	0	0	1	0	0	SEARO	Thailand	0	0	1	1998.5	0	1	Pre-post study with randomized controls	1	0	1. Urban +/- periurban	2	1960	2	no intervention	training + printed recording form + poster for HCP + printed and electronic literature for HCP + peer review + group process + enforcement of regulations			IHCAR, Karolinska Institutet. Towards good pharmacy practice in Thailand and Vietnam - A mult-intervention approach to rationalise drug use through private pharmacies. The IHCAR, HSRI, CoP & LSHTM EC Funded Collaborative Project, 1997-2000. Contract no. ERB3514PL950674. 2000.	IHCAR, Karolinska Institutet. Towards good pharmacy practice in Thailand and Vietnam - A multi-intervention approach to rationalise drug use through private pharmacies. Individual Partner Report LSHTM. The IHCAR, HSRI, CoP & LSHTM EC Funded Collaborative Project, 1997-2000. Contract no. ERB3514PL950674. June 2000. 7 pages.	IHCAR, Karolinska Institutet. Towards good pharmacy practice in Thailand and Vietnam - A multi-intervention approach to rationalise drug use through private pharmacies. Completed Catalogue Page. The IHCAR, HSRI, CoP & LSHTM EC Funded Collaborative Project, 1997-2000. Contract no. ERB3514PL950674. 2000.	Chalker J, Ratanawijitrasin S, Chuc NTK, Petzold M, Tomson G. Effectiveness of a multi-component intervention on dispensing practices at private pharmacies in Vietnam and Thailand--a randomized controlled trial. Social Science and Medicine, 2005; 60(1):131-141.
136500002	0	0	1	2	0	0	0	1	0	0	0	1	0	0	WPRO	Viet Nam	0	0	1	1998.5	0	1	Pre-post study with randomized controls	1	0	1. Urban +/- periurban	1	370	2	no intervention	training + printed recording form + peer review + group process + enforcement of regulations			Larsson M. Antibiotic use and resistance: Assessing and improving utilisation and provision of antibiotics and other drugs in Vietnam. Doctor´s Thesis from Karolinska Institutet, December 17, 2003, ISBN: 91-7349-630-8. available at:http://diss.kib.ki.se/2003/91-7349-630-8/thesis.pdf. accessed June 10, 2008	IHCAR, Karolinska Institutet. Towards good pharmacy practice in Thailand and Vietnam - A mult-intervention approach to rationalise drug use through private pharmacies. Final Report. The IHCAR, HSRI, CoP & LSHTM EC Funded Collaborative Project, 1997-2000. Contract no. ERB3514PL950674. 2000. 60 pages.	IHCAR, Karolinska Institutet. Towards good pharmacy practice in Thailand and Vietnam - A multi-intervention approach to rationalise drug use through private pharmacies. Individual Partner Report LSHTM. The IHCAR, HSRI, CoP & LSHTM EC Funded Collaborative Project, 1997-2000. Contract no. ERB3514PL950674. June 2000. 7 pages.	IHCAR, Karolinska Institutet. Towards good pharmacy practice in Thailand and Vietnam - A multi-intervention approach to rationalise drug use through private pharmacies. Individual Partner Report CoP Vietnam. The IHCAR, HSRI, CoP & LSHTM EC Funded Collaborative Project, 1997-2000. Contract no. ERB3514PL950674. 2000. 15 pages.	IHCAR, Karolinska Institutet. Towards good pharmacy practice in Thailand and Vietnam - A multi-intervention approach to rationalise drug use through private pharmacies. Completed Catalogue Page. The IHCAR, HSRI, CoP & LSHTM EC Funded Collaborative Project, 1997-2000. Contract no. ERB3514PL950674. 2000. 1 page.	Chalker J, Chuc NTK, Falkenberg T, Tomson G. Private pharmacies in Hanoi, Vietnam: a randomized trial of a 2-year multi-component intervention on knowledge and stated practice regarding ARI, STD and antibiotic/steroid requests. Tropical Medicine and International Health. 2002; 7(9):803-810.	Chuc NTK, Larson M, Do NT, Diwan VK, Tomson GB, Falkenberg T. Improving private pharmacy practice: a multi-intervention experiment in Hanoi, Vietnam. Journal of Clinical Epidemiology, 2002; 55(11):1148-1155.	Chalker J, Ratanawijitrasin S, Chuc NTK, Petzold M, Tomson G. Effectiveness of a multi-component intervention on dispensing practices at private pharmacies in Vietnam and Thailand--a randomized controlled trial. Social Science and Medicine, 2005; 60(1):131-141.
138600001	0	1	0	1	1	0	0	0	0	0	0	0	0	0	AMRO	Argentina, Brazil, Chile, Colombia, Costa Rica	0	1	0	2002	0	1	Pre-post study with non-randomized controls	0	0	1. Urban +/- periurban	5	3940	2	no intervention	training			Levav I, Kohn R, Montoya I, Palacio C, Rozic P, Solano I, Valentini W, Vicente B, Morales JC, Eigueta FE, Saravanan Y, Miranda CT, Sartorius N. Training Latin American primary care physicians in the WPA module on depression: results of a multicenter trial. Psychological Medicine. 2005;35(1):35-45.	Valentini W, Levav I, Kohn R, Miranda CT, Mello AA, Mello MF, Ramos CP. Treinamento de clínicos para o diagnóstico e tratamento da depressão [An educational training program for physicians for diagnosis and treatment of depression]. Revista de saúde pública. 2004;38(4):522-8.	Vicente B, Kohn R, Levav I, Espejo F, Saldivia S, Sartorius N. Training primary care physicians in Chile in the diagnosis and treatment of depression. Journal of Affective Disorders. 2007;98(1-2):121-7.
139400001	0	0	1	2	1	0	1	1	0	0	0	0	0	0	AMRO	Colombia	1	0	0	1998.5	0	1	Interrupted time series with no controls	0	1	1. Urban +/- periurban	2	2310	1	training + printed recording form + poster for HCP + structured prescribing				Pérez A, Dennis RJ, Rodríguez B, Castro AY, Delgado V, Lozano JM. Improvement of parenteral antibiotic use in a university hospital in Colombia. Presented at: 2nd International Conference on Improving Use of Medicines (ICIUM); 2004 March 30 - April 2; Chiang Mai, Thailand. 20 p.	Pérez A, Dennis RJ, Rodríguez B, Castro AY, Delgado V, Lozano JM, Castro MC. An interrupted time series analysis of parenteral antibiotic use in Colombia. Journal of Clinical Epidemiology. 2003; 56(10): 1013-1020.
144200001	0	1	0	0	0	0	1	0	0	0	0	0	1	0	AFRO	Nigeria	0	1	0	1995	0	1	Pre-post study with randomized controls	1	0	2. Periurban only	1	170	2	no intervention	training + poster for HCP + printed literature for HCP			Odusanya OO, Oyediran MA. The effect of an educational intervention on improving rational drug use. Nigerian Postgraduate Medical Journal. 2004 Jun;11(2):126-131.
149400001	0	1	0	3	1	0	1	0	0	0	0	0	0	0	AFRO	Nigeria	0	1	0	1996.5	0	0	Pre-post study with randomized controls	1	0	6. Unclear or not stated	1	280	3	no intervention	printed STG + poster for HCP	training + printed STG + poster for HCP		Isah AO, Isah EC, Okojie OH, Ohaju-Obodo JO. An interventional study to promote rational use of drugs with a newly developed prescribing indicator reference standards in Nigeria. Department of Medicine and Community Health, University of Benin/Teaching Hospital. 1999.	Isah AO. Can drug use indicators serve as interventional tools in promoting rational use of drugs? A field testing study in Nigeria. A Report to the Drug Action Programme - World Health Organization (DAP-WHO), DAP-WHO PROJECT GLOBAL/RUS/ISAH (E19/181/49), 1999.
149600001	0	1	1	1	1	0	0	0	0	0	0	0	0	0	AFRO	Nigeria	0	1	0	2000.5	0	1	Post-only study with randomized controls	1	0	1. Urban +/- periurban	1	310	3	no intervention	academic detailing	training (small group)		Akoria OA, Isah AO. Prescription writing in publilc and private hospitals in Benin City, Nigeria: the effects of an educational intervention. Canadian Journal of Clinical Pharmacology. 2008; 15(2): e295-e305.
149990101	0	0	0	1	1	0	0	0	0	0	0	0	0	0	WPRO	Philippines	0	1	0	1996	0	0	Pre-post study with randomized controls	1	0	1. Urban +/- periurban	2	1170	2	training (non-interactive) + printed STG	training (interactive) + printed STG			Saniel MC, Acuin CS, Arciaga RS, Lansang MD, Naidas OD, Balis AC, Sevilleja JEAD. Improving private physician's prescribing practices in the diagnosis and treatment of uncomplicated urinary tract infection through clinical practice guidelines. 1999.	Saniel MC, Acuin CS, Arciaga RS, Lansang MD, Naidas OD, Sevilleja JEAD, Bustos MV, Balais AC, Ross-Degnan D. Improving private practitioners’ adherence to evidence-based practice guidelines: a quasi-experimental study in the Philippines. Presented at the Second International Conference on Improving Use of Medicines, Chiang Mai, Thailand, March 30 - April 2, 2004. Available at: http://www.icium.or…
149990102	0	0	0	1	1	0	0	0	0	0	0	0	0	0	WPRO	Philippines	0	1	0	1996	0	0	Pre-post study with randomized controls	1	0	1. Urban +/- periurban	2	1170	2	training (non-interactive) + printed STG + audit with feedback	training (interactive) + printed STG + audit with feedback			Saniel MC, Acuin CS, Arciaga RS, Lansang MD, Naidas OD, Balis AC, Sevilleja JEAD. Improving private physician's prescribing practices in the diagnosis and treatment of uncomplicated urinary tract infection through clinical practice guidelines. 1999.	Saniel MC, Acuin CS, Arciaga RS, Lansang MD, Naidas OD, Sevilleja JEAD, Bustos MV, Balais AC, Ross-Degnan D. Improving private practitioners’ adherence to evidence-based practice guidelines: a quasi-experimental study in the Philippines. Presented at the Second International Conference on Improving Use of Medicines, Chiang Mai, Thailand, March 30 - April 2, 2004. Available at: http://www.icium.or…
150900001	0	1	0	0	1	0	1	0	0	0	0	0	1	0	WPRO	Philippines	0	1	0	1994.5	0	0	Pre-post study with non-randomized controls	0	0	2. Periurban only	2	1030	2	no intervention	training + pamphlet for HCP + printed recording form + equipment + community education meetings + printed materials for community			Vergeire-Dalmacion G. Antibiotic prescribing in Philippine government health facilities within the context of the WHOCARI Program: the effect of an intervention targeting caretakers [master's thesis]. [Newcastle (NSW)]: The University of Newcastle; July 1996. 111p (excluding references).
152090101	0	0	1	1	1	1	1	0	1	0	0	0	0	0	AFRO	Kenya	0	1	0	2001.5	0	0	Pre-post study with randomized controls	1	0	3. Urban-rural mix	1	390	2	training on malaria (placebo) + printed STG on malaria (placebo) + manager training	training on ARI + printed STG on ARI + manager training			Gitau LN, Kiambuthi J. The effect of an educational intervention on use of antibiotics in the treatment of ARI and malaria in six mission hospitals in Kenya. Nairobi, Kenya: Centre for Drug Management and Policy / Mission for Essential Drugs and Supplies; 2004, 57 p.	Gitau L, Kiambuthi J. Recent advances in provision of primary health care by mission organizations: the effect of an educational intervention on antibiotic use in the treatment of ARI and malaria in six mission hospitals in Kenya. Presented at: Second International Conference on Improving Use of Medicines; March 30 - April 2, 2004; Chiang Mai, Thailand [cited April 9, 2010]. 16 p. Available from:…	Gitau LN, Kiambuthi J. Study to assess the effect of an educational intervention to influence appropriate prescribing in the use of antibiotics in the treatment of ARI and malaria in mission hospitals in Kenya. Nairobi, Kenya: Centre for Drug Management and Policy / Mission for Essential Drugs and Supplies. 18 p.
152090102	0	0	1	1	1	1	1	0	1	0	0	0	0	0	AFRO	Kenya	0	1	0	2001.5	0	0	Pre-post study with randomized controls	1	0	3. Urban-rural mix	1	390	2	training on ARI (placebo) + printed STG on ARI (placebo) + manager training	training on malaria + printed STG on malaria + manager training			Gitau LN, Kiambuthi J. The effect of an educational intervention on use of antibiotics in the treatment of ARI and malaria in six mission hospitals in Kenya. Nairobi, Kenya: Centre for Drug Management and Policy / Mission for Essential Drugs and Supplies; 2004, 57 p.	Gitau L, Kiambuthi J. Recent advances in provision of primary health care by mission organizations: the effect of an educational intervention on antibiotic use in the treatment of ARI and malaria in six mission hospitals in Kenya. Presented at: Second International Conference on Improving Use of Medicines; March 30 - April 2, 2004; Chiang Mai, Thailand [cited April 9, 2010]. 16 p. Available from:…	Gitau LN, Kiambuthi J. Study to assess the effect of an educational intervention to influence appropriate prescribing in the use of antibiotics in the treatment of ARI and malaria in mission hospitals in Kenya. Nairobi, Kenya: Centre for Drug Management and Policy / Mission for Essential Drugs and Supplies. 18 p.
179700001	0	0	0	2	1	0	1	1	0	1	0	0	1	0	SEARO	Thailand	0	1	0	1992	1	0	Post-only study with randomized controls	1	0	5. Rural only	2	1890	2	no intervention	training+continuous quality improvement+provision of drugs+add STD care to MCH/FP clinic+community education grp mtg+community education home visits+patient education grp mtg+printed materials for community			Thongkrajai E. Feasibility of integrating STD services and STD/HIV/AIDS prevention into the MCH/FP programme in Thailand. Final report. 1995. 34 p. Located at: K4Health Project, Center for Communication Programs, Johns Hopkins Bloomberg School of Public Health, Baltimore, MD; POPLINE Document Number 120656.
194300001	0	0	1	0	0	0	1	0	0	0	0	1	0	0	SEARO	Nepal	0	1	0	2002	1	1	Pre-post study with non-randomized controls	0	0	5. Rural only	1	240	2	no intervention	training + audit with feedback + franchising + referral network between physicians and HFs			Agha S, Karim AM, Balal A, Sosler S. A quasi-experimental study to assess the performance of a reproductive health franchise in Nepal. Washington DC: USAID/Commercial Market Strategies Project. Country Research Series. No.14; September 2003. 38p.	Agha S, Karim AM, Balal A, Sosler S. The impact of a reproductive health franchise on client satisfaction in rural Nepal. Health Policy and Planning. 2007; 22(5): 320-328.	Agha S, Gage A, Balal A. Changes in perceptions of quality of, and access to, services among clients of a fractional franchise network in Nepal. Journal of Biosocial Science. 2007; 39(3):341-354.
195400001	0	1	0	1	1	0	0	0	0	0	0	0	0	0	SEARO	Bangladesh	0	1	0	1995.5	0	1	Pre-post study with non-randomized controls	0	0	3. Urban-rural mix	1	340	3	no intervention	training + printed STG	training + printed recording form + printed STG + audit with feedback		Chowdhury AKA, Khan OF, Matin MA, Begum K, Galib MA. Study of effect of standard treatment guidelines with or without audit on prescribing for diarrhoea and acute respiratory infection in some government health facilities in Bangladesh. Unpublished manuscript.	Chowdhury AKA, Khan OF, Matin MA, Begum K, Galib MA. Effect of standard treatment guidelines with or without prescription audit on prescribing for acute respiratory tract infection (ARI) and diarrhoea in some Thana Health Complexes (THCs) of Bangladesh. Bangladesh Medical Research Council Bulletin, 2007; 33(1):21-30.
197400001	0	1	0	2	1	0	1	1	0	0	0	1	0	0	AFRO	United Republic of Tanzania	0	1	0	2003.5	0	1	Post-only study with randomized controls	1	0	5. Rural only	1	360	3	no intervention	training + printed STG	training + printed STG + equipment		Ngasala B, Mubi M, Warsame M, Petzold MG, Massele AY, Gustafsson LL, Tomson G, Premji Z, Bjorkman A. Impact of training in clinical and microscopy diagnosis of childhood malaria on antimalarial drug prescription and health outcome at primary health care level in Tanzania: a randomized controlled trial. Malaria Journal. 2008; 7:199.
201000001	0	1	0	1	1	0	1	0	0	0	0	0	0	0	SEARO	Sri Lanka	1	0	0	2003.5	0	1	Pre-post study with randomized controls	1	0	1. Urban +/- periurban	2	1070	2	no intervention	training + printed recording form + printed STG			Senarath U, Fernando D, Rodrigo I. Effect of training for care providers on practice of essential newborn care in hospitals in Sri Lanka. Journal of Obstetric Gynecologic and Neonatal Nursing. 2007 Nov-Dec;36(6):531-541.
205400001	0	0	1	1	0	0	0	1	0	0	0	1	0	0	AFRO	Kenya	0	0	1	2005	0	1	Post-only study with randomized controls	1	0	5. Rural only	1	520	2	no intervention	training + pamphlet for HCP + printed STG + community education meetings + printed materials for community + nonmedical equipment supply			Abuya T, Fegan G, Rowa Y, Karisa B, Ochola S, Mutemi W, Marsh V. Impact of Ministry of Health interventions on private medicine retailer knowledge and practices on anti-malarial treatment in Kenya. American Journal of Tropical Medicine & Hygiene. 2009; 80(6): 905-913.
205900001	0	1	1	1	1	0	1	0	0	0	0	1	0	0	AFRO	Benin	0	1	0	2001.5	0	1	Pre-post study with non-randomized controls	0	0	3. Urban-rural mix	1	350	3	no intervention	training + printed recording form (usual supports) + printed STG + poster for HCP + supervision (usual supports)	training + printed recording form (study supports) + printed STG + poster for HCP + printed job aid + supervision (study supports) + HCP performance-based non-financial incentive		Rowe AK, Osterholt DM, Kouamé J, Piercefield E, Herman KM, Onikpo F, Lama M, Deming MS. Trends in health worker performance after implementing the Integrated Management of Childhood Illness strategy in Benin. Tropical Medicine and International Health. 2012;17(4):438-46.	Osterholt DM, Onikpo F, Lama M, Deming MS, Rowe AK. Improving pneumonia case-management in Benin: a randomized trial of a multi-faceted intervention to support health worker adherence to Integrated Management of Childhood Illness guidelines. Human Resources for Health. 2009;7 (77): 1-13.	Rowe AK, Onikpo F, Lama M, Osterholt DM, Rowe SY, Deming MS. A multifaceted intervention to improve health worker adherence to integrated management of childhood illness guidelines in Benin. American Journal of Public Health. 2009; 99(5): 837-846.	Rowe AK, Onikpo F, Lama M, Deming MS. The rise and fall of supervision in a project designed to strengthen supervision of Integrated Management of Childhood Illness in Benin. Health Policy and Planning. 2010; 25(2): 125-134.
214300001	0	1	0	3	1	0	1	0	0	1	0	1	1	0	AMRO	Nicaragua	0	1	0	2001	0	1	Pre-post study with randomized controls	1	0	5. Rural only	1	970	2	no intervention	training + drug supply + contracting-out services + conditional cash transfers + community education meetings + community education radio + accreditation			Rawlings LB, Rubio GM. Evaluating the Impact of Conditional Cash Transfer Programs: Lessons from Latin America. 2003. World Bank, Policy Research Working Paper Series, number 3119. available at: http://www-wds.worldbank.org/external/default/WDSContentServer/IW3P/IB/2003/09/30/000094946_0309160409264/Rendered/PDF/multi0page.pdf, accessed Jan 19, 2010.	Lacayo C. Red de Protección Social: Nicaragua. Inter-regional Inequality Facility Policy Brief No. 3, February 2006.	Maluccio JA, Flores R. Impact Evaluation of a Conditional Cash Transfer Program. The Nicaraguan Red de Protección Social. Research Report 141, International Food Policy Research Institute, Washington DC. 2005. available at: http://www.ifpri.org/pubs/abstract/141/rr141.pdf, accessed Jan 14, 2009	Maluccio JA, Flores R. Impact evaluation of a conditional cash transfer program: The Nicaraguan Red de Proteccion Social. FCND Discussion Paper No. 184. Food Consumption and Nutrition Division, International Food Policy Research Institute. July 2004. available at: http://www.ifpri.org/divs/fcnd/dp/papers/fcndp184.pdf, accessed Jan 15, 2009	Barham T, Brenzel L, Maluccio JA. BEYOND 80%: ARE THERE NEW WAYS OF INCREASING VACCINATION COVERAGE? Evaluation of CCT Programs in Mexico and Nicaragua. June 2007. available at: http://ssrn.com/abstract=993760. accessed June 12, 2009.	Glassman A, Todd J, Gaarder M. Chapter 6: Latin America: Cash Transfers to Support Better Household Decisions. p. 89-121. In: Eichler R, Levine R, and the Performance-Based Incentives Working Group. Performance incentives for global health: potential and pitfalls. Versa Press: East Peoria, Illinois. 2009. available at: http://www.cgdev.org/doc/books/PBI/06_CGD_Eichler_Levine-Ch6.pdf; accessed Jul…	Stecklov G, Winters P, Todd J, Regalia F. Demographic Externalities from Poverty Programs in Developing Countries: Experimental Evidence from Latin America. Department of Economics Working Paper Series. No. 2006-1. January 2006. American University: Washington, DC. available at: http://www1.american.edu/academic.depts/cas/econ/workingpapers/2006-01.pdf; accessed July 7, 2009.	Regalía F, Castro L. Chapter 11: Nicaragua: Combining Demand- and Supply-Side Incentives. p. 215-235. In: Eichler R, Levine R, and the Performance-Based Incentives Working Group. Performance incentives for global health: potential and pitfalls. Versa Press: East Peoria, Illinois. 2009. available at: http://www.cgdev.org/doc/books/PBI/06_CGD_Eichler_Levine-Ch11.pdf; accessed July 7, 2009.	Regalía F, Castro L. Performance-Based Incentives for Health: Demand- and Supply-Side Incentives in the Nicaraguan Red de Protección Social. CGD Working Paper #119. April 2007. Center for Global Development. available at: http://www.cgdev.org/content/publications/detail/13541, accessed Sept 7, 2009	Glassman A, Todd J, Gaarder M. Performance-Based Incentives for Health: Conditional Cash Transfer Programs in Latin America and the Caribbean. CGD Working Paper #120. April 2007. Center for Global Development. Available at: http://www.cgdev.org/content/publications/detail/13542, accessed Sept 7, 2009.	Rawlings RB, Rubio GM. Evaluating the Impact of Conditional Cash Transfer Programs. The World Bank Research Observer 2005; 20(1):29-55.	Stecklov G, Winters P, Todd J, Regalia F. Unintended effects of poverty programmes on childbearing in less developed countries: experimental evidence from Latin America. Population Studies. 2007;61(2):125-40.	BarhamT, Maluccio J. Eradicating disease: the effect of conditional cash transfers on vaccination coverage in rural Nicaragua. Journal of Health Economics, 2009;38(3): 611-621.
219000001	0	1	1	0	0	0	1	0	0	0	0	0	0	0	AFRO	Kenya	0	1	0	2003.5	0	1	Pre-post study with non-randomized controls	0	0	5. Rural only	1	460	2	no intervention	training + printed STG + printed job aid + supervision + printed materials for community			Ouma PO, Van Eijk AM, Hamel MJ, Sikuku E, Odhiambo F, Munguti K, Ayisi JG, Kager PA, Slutsker L. The effect of health care worker training on the use of intermittent preventive treatment for malaria in pregnancy in rural western Kenya. Tropical Medicine and International Health. 2007; 12(8): 1-9.	Van Eijk AM, Blokland IE, Slutsker L, Odhiambo F, Ayisi JG, Bles HM, Rosen DH, Adazu K, Lindblade KA. Use of intermittent preventive treatment for malaria in pregnancy in a rural area of western Kenya with high coverage of insecticide-treated bed nets. Tropical Medicine and International Health. 2005; 10(11): 1134-1140.
223300001	0	0	0	1	0	0	0	0	0	0	0	0	1	0	AMRO	Paraguay	0	0	1	1992.5	0	0	Pre-post study with randomized controls	1	0	5. Rural only	2	.	4	training (no detailed guidance)	academic detailing + printed STG	supervision	academic detailing + printed STG + supervision	Carrón JM, Melián MM, León FR. Developing tools of low-cost use to improve the quality of care of rural CBD in Paraguay: final report -- January 1, 1992 - July 31, 1994. Centro Paraguayo de Estudios de Poblacion (CEPEP), Population Council, Latin America and Caribbean Regional Office, USAID. Bureau for Global Programs, Field Support, and Research. Center for Population, Health and Nutrition. Offi…	Carrón JM, Melián MM, León FR. Desarrollando instrumentos de bajo costo para mejorar la calidad de los servicios rurales de planificación familiar: informe final -- Enero 1992 - Diciembre 1993. Asunción, Paraguay: Centro Paraguayo de Estudios de Poblacion (CEPEP), Population Council, 1993. 16p.
223790101	0	1	0	2	0	0	0	0	1	0	0	1	0	0	SEARO	Bangladesh	1	1	0	2002.5	0	1	Pre-post study with randomized controls	1	0	5. Rural only	1	400	2	no intervention	training + printed recording form + printed STG + printed job aid + supervision + drug supply + improvement of drug supply logistics + referral tracking system + equipment			Hoque DME, Arifeen SE, Rahman M, Chowdhury EK, Haque TW, Begum K, Hossain MA, Akter T, Haque F, Anwar T, Billah SM, Rahman AE, Huque MH, Christou A, Baqui AH, Bryce J, Black RE. Improving and sustaining quality of child health care through IMCI training and supervision: experience from rural Bangladesh. Health Policy and Planning. 2014; 29(6):753-62.	Bryce J, Victora CG, Habicht JP, Vaughan JP, Black RE. The multi-country evaluation of the integrated management of childhood illness strategy: lessons for the evaluation of public health interventions. American Journal of Public Health. 2004; 94(3):406-15.	Personal communication from Shams El Arifeen, International Centre for Diarrhoeal Diseases Research, Bangladesh (sarifeen@siriusbb.com; shams@icddrb.org) to Samantha Rowe, Centers for Disease Control and Prevention (say9@cdc.gov) on June 13, 2007, which contained a draft manuscript and supplementary tables of Bangladesh MCE Health Facility Survey Indicators.	El Arifeen S. Section 4: Health Facility Survey. 2000; xxv-xxxiv.	Arifeen SE, Bryce J, Gouws E, Baqui AH, Black RE, Hoque DME, Chowdhury EK, Yunus M, Begum N, Akter T, Siddique A. Quality of care for under-fives in first-level health facilities in one district of Bangladesh. Bulletin of the World Health Organization, 2005; 83: 260-267.	El Arifeen S, Blum LS, Hoque DM, Chowdhury EK, Khan R, Black RE, Victora CG, Bryce J. Integrated Management of Childhood Illness (IMCI) in Bangladesh: early findings from a cluster-randomised study. Lancet 2004; 364: 1595-1602.	Arifeen SE, Hoque DME, Akter T, Rahman M, Hoque ME, Begum K, Chowdhury EK, Khan R, Blum LS, Ahmed S, Hossain MA, Siddik A, Begum N, Rahman QS, Haque TM, Billah SM, Islam M, Rumi RA, Law E, Al-Helal ZAM, Baqui AH, Schellenberg J, Adam T, Moulton LH, Habicht JP, Scherpbier RW, Victora CG, Bryce J, Black RE. Effect of the Integrated Management of Childhood Illness strategy on childhood mortality and…
231300001	0	1	0	0	1	0	0	0	0	0	0	1	0	0	AMRO	Guatemala	0	1	0	2001.5	0	1	Pre-post study with randomized controls	1	0	3. Urban-rural mix	2	1680	2	no intervention	training + printed STG + printed job aid + supervision			León FR, Brambila C, de la Cruz M, Bratt J, García Colindres J, Vásquez B, Morales C. Testing balanced counseling to improve provider-client interaction in Guatemala’s MOH clinics. Population Council, Washington, DC. 2003 October. 36p. Basic funding provided by the US Agency for International Development. FRONTIERS Cooperative Agreement No.: HRN-A-00-98-00012-00. Project No.: 5801 13052.	León FR, Brambila C, de la Cruz M, García Colindres J, Morales C, Vásquez B. Providers' compliance with the balanced counseling strategy in Guatemala. Studies in Family Planning. 2005; 36(2): 117-126.
235900001	0	1	1	2	1	0	1	0	0	0	0	0	0	0	AMRO	Brazil	1	1	0	1992	0	1	Pre-post study with randomized controls	1	0	1. Urban +/- periurban	2	2780	2	no intervention	training			Westphal MF, Taddei JA, Venancio SI, Bogus CM. Breast-feeding training for health professionals and resultant institutional changes. Bulletin of the World Health Organization. 1995; 73(4): 461-468.
237000001	0	1	1	0	0	0	1	0	0	1	0	0	0	0	AFRO	Uganda	0	1	0	2004	0	0	Interrupted time series with no controls	0	1	6. Unclear or not stated	1	270	1	training + printed STG + printed job aid				Hizaamu RNB, Waluga P. Total quality management. PowerPoint presentation presented at the Jinja District Local Government Health Management Team Quarterly Feedback Meeting; 2005 October; Uganda, and the HIV & AIDS Fellowship Programme Annual Dissemination Workshop; 2005 December 2; Uganda.
237700001	0	1	0	0	0	0	0	0	0	0	0	0	1	1	SEARO	Thailand	1	0	0	1993	0	1	Interrupted time series with no controls	0	1	1. Urban +/- periurban	2	2130	1	training + printed STG + patient education group meetings + one-on-one patient education meetings				Kasemsarn P, Ngarmpiyasakul C, Phongpanich S, Pulkasisri N. Baby-friendly hospital: how to sustain? Journal of the Medical Association of Thailand. 1995; 78(7):362-368.
238900001	0	1	0	0	1	0	1	0	0	0	0	0	0	0	SEARO	Indonesia	0	1	0	1991.5	0	0	Pre-post study with non-randomized controls	0	0	6. Unclear or not stated	2	680	2	no intervention	training + academic detailing			Gani L, Tangkilisan A, Pujilestari L. Improving rational prescribing of physicians: an educational approach for acute diarrhoea in children in Jakarta. Paper presented at: First International Conference on Improving Use of Medicines (ICIUM); 1997 April 1-4; Chiang Mai, Thailand [cited March 29, 2010]. Available from: http://archives.who.int/icium/icium1997/posters/2b2_text.html
241400001	0	1	0	3	0	0	1	0	0	0	0	0	0	0	EMRO	Pakistan	0	1	0	1999.5	0	1	Post-only study with randomized controls	1	0	1. Urban +/- periurban	1	470	2	no intervention	training + printed materials for HCPs (STG) and patients			Zaman S, Ashraf RN, Martines J. Training in complementary feeding counselling of healthcare workers and its influence on maternal behaviours and child growth: a cluster randomized controlled trial in Lahore, Pakistan. Journal of Health Population and Nutrition. 2008; 26(2): 210-222.
242200001	0	1	0	0	1	0	0	0	0	0	0	0	0	0	AMRO	Haiti	1	1	0	1993.5	0	0	Interrupted time series with no controls	0	1	5. Rural only	1	.	1	training				Aupont O. Reducing multiple antibiotics in treatment of acute respiratory infections (ARI): A planned intervention in Haiti. Poster presented at: First International Conference on Improving Use of Medicines (ICIUM); 1997 1 - 4 Apr; Chiang Mai, Thailand. Available from: http://archives.who.int/icium/icium1997/posters/2P17_TXT.html, accessed April 8, 2010.
243200001	0	1	0	2	1	0	0	0	0	0	0	0	0	0	WPRO	Viet Nam	0	1	0	2003	0	0	Pre-post study with randomized controls	1	0	5. Rural only	1	510	2	no intervention	training + monitoring + peer review + supervision + group process			Dung PH, Chuc NTK, Ross-Degnan D. Improving community drug use focusing on hospital out-patient through peer review and implementation of guidelines for ARI treatment. Presented at the Second International Conference on Improving Use of Medicines, Chiang Mai, Thailand, March 30 - April 2, 2004. available at: http://www.icium.org/icium2004/resources/ppt/O_CH021.ppt, accessed April 9, 2010.	Dung PH, Chuc NTK, Dung NT, Ross-Degnan D. Improving ARI treatment in Vietnam district hospitals through implementation of locally adapted standard treatment guidelines, peer review, and supervision. Draft manuscript. 2005 October. 17 p.
243300001	0	0	1	1	0	0	0	0	0	0	0	0	0	1	AFRO	Nigeria	0	1	0	2001	0	0	Pre-post study with randomized controls	1	0	6. Unclear or not stated	1	310	3	no intervention	academic detailing + printed STG	academic detailing + non-performance-based non-financial incentive with job aid		Taylor O, Momodu RO, Odufalu O. Improving chloroquine prescribing in private clinics in Lagos State, Nigeria. Presented at: Second International Conference on Improving Use of Medicines (ICIUM); 2004 March 30-April 2; Chiang Mai, Thailand [cited April 9, 2010]. 13 p. Available from: http://www.icium.org/icium2004/resources/ppt/O_MA011.ppt
247600001	0	0	0	0	1	0	0	0	0	0	0	0	0	0	AFRO	Ghana	1	0	0	2001	0	0	Pre-post study with non-randomized controls	0	0	1. Urban +/- periurban	1	300	2	no intervention	training			Ofei F, Forson A, Tetteh R, Ofori-Adjei D. An intervention to improve antibiotic prescribing habits of doctors in a teaching hospital. Presented at: Second International Conference on Improving Use of Medicines (ICIUM); March 30 - April 2, 2004; Chiang Mai, Thailand [cited April 10, 2010]. 13 p. Available from: http://www.icium.org/icium2004/resources/ppt/AD029.ppt
249100001	0	1	0	3	1	0	1	0	0	0	1	0	0	0	AMRO	Mexico	1	0	0	2001	0	1	Pre-post study with randomized controls	1	0	1. Urban +/- periurban	3	6310	2	no intervention	in-service training + non-supervisors help HCP + non-medical commodity supply + electronic literature for HCP			Gülmezoglu AM, Langer A, Piaggio G, Lumbiganon P, Villar J, Grimshaw J. Cluster randomised trial of an active, multifaceted educational intervention based on the WHO Reproductive Health Library to improve obstetric practices. BJOG: An International Journal of Obstetrics and Gynecology. 2007; 114(1):16-23.	Gülmezoglu AM, Villar J, Grimshaw J, Piaggio G, Lumbiganon P, Langer A. Cluster randomized trial of an active, multifaceted information dissemination intervention based on the WHO Reproductive health library to change obstetric practices: methods and design issues [ISRCTN14055385]. BMC Medical Research Methodology. 2004; 4:2.	Lumbiganon P, Gülmezoglu AM, Piaggio G, Langer A, Grimshaw J. Magnesium sulfate is not used for pre-eclampsia and eclampsia in Mexico and Thailand as much as it should be. Bulletin of the World Health Organization. 2007; 85(10):763-7.
249100002	0	1	0	2	1	0	1	0	0	0	1	0	0	0	SEARO	Thailand	1	0	0	2001	0	1	Pre-post study with randomized controls	1	0	4. Town +/- rural	3	1960	2	no intervention	in-service training + non-supervisors help HCP + non-medical commodity supply + electronic literature for HCP			Gülmezoglu AM, Langer A, Piaggio G, Lumbiganon P, Villar J, Grimshaw J. Cluster randomised trial of an active, multifaceted educational intervention based on the WHO Reproductive Health Library to improve obstetric practices. BJOG: An International Journal of Obstetrics and Gynecology. 2007;114(1):16-23.	Gülmezoglu AM, Villar J, Grimshaw J, Piaggio G, Lumbiganon P, Langer A. Cluster randomized trial of an active, multifaceted information dissemination intervention based on The WHO Reproductive health library to change obstetric practices: methods and design issues [ISRCTN14055385]. BMC Medical Research Methodology. 2004; 4:2.	Lumbiganon P, Gülmezoglu AM, Piaggio G, Langer A, Grimshaw J. Magnesium sulfate is not used for pre-eclampsia and eclampsia in Mexico and Thailand as much as it should be. Bulletin of the World Health Organization. 2007; 85(10):763-7.
255500001	0	1	0	1	1	0	1	1	0	0	0	1	0	0	AFRO	Niger	1	0	0	2007	0	1	Interrupted time series with no controls	0	1	1. Urban +/- periurban	1	280	1	training + poster for HCP + improvement collaborative				Catsambas TT, Franco LM, Gutmann M, Knebel E, Hill P, Lin Y-S. Evaluating health care collaboratives: the experience of the Quality Assurance Project. Bethesda (MD): University Research Co., LLC (URC); 2008 June. 89 p. Collaborative Evaluation Series. Published by the USAID Health Care Improvement Project.	Franco LM, Marquez L, Ethier K, Balsara Z, Isenhower W. Results of collaborative improvement: effects on health outcomes and compliance with evidence-based standards in 27 applications in 12 countries. Bethesda (MD): University Research Co., LLC (URC); 2009 December. 48 p. Collaborative Evaluation Series. Published by the USAID Health Care Improvement Project.	USAID Health Care Improvement Project. The Improvement Collaborative: an approach to rapidly improve health care and scale up quality services. Bethesda (MD): University Research Co., LLC (URC); 2008 June. 20 p. Published by the USAID Health Care Improvement Project.	Franco LM, Webb L. Niger Site Visit Report. Unpublished report prepared for the U.S. Agency for International Development (USAID) by the USAID Health Care Improvement Project and the Quality Assurance Project. 2008 February. pp iii-v and 30-42.	Franco LM, Marquez L. Effectiveness of collaborative improvement: evidence from 27 applications in 12 less-developed and middle-income countries. British Medical Journal Quality & Safety. 2011; 20(8):658-65.	Broughton E, Saley Z, Boucar M, Alagane D, Hill K, Marafa A, Asma Y, Sani K. Cost-effectiveness of a quality improvement collaborative for obstetric and newborn care in Niger. International Journal of Health Care Quality Assurance. 2013;26(3):250-61.
255500002	0	1	0	0	0	0	1	0	0	0	0	1	0	0	AFRO	Niger	0	0	1	2008	0	1	Interrupted time series with no controls	0	1	1. Urban +/- periurban	1	330	1	training + poster for HCP + improvement collaborative				Catsambas TT, Franco LM, Gutmann M, Knebel E, Hill P, Lin Y-S. Evaluating health care collaboratives: the experience of the Quality Assurance Project. Bethesda (MD): University Research Co., LLC (URC); 2008 June. 89 p. Collaborative Evaluation Series. Published by the USAID Health Care Improvement Project.	Franco LM, Marquez L, Ethier K, Balsara Z, Isenhower W. Results of collaborative improvement: effects on health outcomes and compliance with evidence-based standards in 27 applications in 12 countries. Bethesda (MD): University Research Co., LLC (URC); 2009 December. 48 p. Collaborative Evaluation Series. Published by the USAID Health Care Improvement Project.	USAID Health Care Improvement Project. The Improvement Collaborative: an approach to rapidly improve health care and scale up quality services. Bethesda (MD): University Research Co., LLC (URC); 2008 June. 20 p. Published by the USAID Health Care Improvement Project.	Franco LM, Webb L. Niger Site Visit Report. Unpublished report prepared for the U.S. Agency for International Development (USAID) by the USAID Health Care Improvement Project and the Quality Assurance Project. 2008 February. pp iii-v and 30-42.	Franco LM, Marquez L. Effectiveness of collaborative improvement: evidence from 27 applications in 12 less-developed and middle-income countries. British Medical Journal Quality & Safety. 2011; 20(8):658-65.	Broughton E, Saley Z, Boucar M, Alagane D, Hill K, Marafa A, Asma Y, Sani K. Cost-effectiveness of a quality improvement collaborative for obstetric and newborn care in Niger. International Journal of Health Care Quality Assurance. 2013;26(3):250-61.
255500003	0	1	0	0	1	0	1	1	0	0	0	1	0	0	AFRO	Niger	1	0	0	2008	0	1	Interrupted time series with no controls	0	1	3. Urban-rural mix	1	330	1	training + poster for HCP + improvement collaborative				Catsambas TT, Franco LM, Gutmann M, Knebel E, Hill P, Lin Y-S. Evaluating health care collaboratives: the experience of the Quality Assurance Project. Bethesda (MD): University Research Co., LLC (URC); 2008 June. 89 p. Collaborative Evaluation Series. Published by the USAID Health Care Improvement Project.	Franco LM, Marquez L, Ethier K, Balsara Z, Isenhower W. Results of collaborative improvement: effects on health outcomes and compliance with evidence-based standards in 27 applications in 12 countries. Bethesda (MD): University Research Co., LLC (URC); 2009 December. 48 p. Collaborative Evaluation Series. Published by the USAID Health Care Improvement Project.	USAID Health Care Improvement Project. The Improvement Collaborative: an approach to rapidly improve health care and scale up quality services. Bethesda (MD): University Research Co., LLC (URC); 2008 June. 20 p. Published by the USAID Health Care Improvement Project.	Franco LM, Webb L. Niger Site Visit Report. Unpublished report prepared for the U.S. Agency for International Development (USAID) by the USAID Health Care Improvement Project and the Quality Assurance Project. 2008 February. pp iii-v and 30-42.	Franco LM, Marquez L. Effectiveness of collaborative improvement: evidence from 27 applications in 12 less-developed and middle-income countries. British Medical Journal Quality & Safety. 2011; 20(8):658-65.
257700001	0	1	0	0	1	0	0	0	0	0	0	0	0	0	SEARO	Bangladesh	1	0	0	1998.5	0	1	Pre-post study with non-randomized controls	0	0	6. Unclear or not stated	2	410	2	no intervention	in-service training			Akter SFU, Heller RD, Smith AJ, Milly AF. Impact of a training intervention on use of antimicrobials in teaching hospitals. The Journal of Infection in Developing Countries. 2009;3(6):447-51.
257800001	0	1	0	1	0	0	1	0	1	0	0	0	0	0	EMRO	Iran (Islamic Republic of)	0	1	0	2007	0	1	Post-only study with randomized controls	1	0	1. Urban +/- periurban	3	4230	2	no intervention	in-service training			Charandabi SMA, Vahidi R, Marions L, Wahlström R. Effect of a peer-educational intervention on provider knowledge and reported performance in family planning services: a cluster randomized trial. BMC Medical Education. 2010; 10:11.
257800002	0	1	0	0	0	0	1	0	1	0	0	0	0	0	EMRO	Iran (Islamic Republic of)	0	1	0	2007	0	1	Post-only study with randomized controls	1	0	1. Urban +/- periurban	3	4230	2	no intervention	Peer education + printed literature for HCP			Charandabi SMA, Vahidi R, Marions L, Wahlström R. Effect of a peer-educational intervention on provider knowledge and reported performance in family planning services: a cluster randomized trial. BMC Medical Education. 2010; 10:11.
258000001	0	1	1	2	0	0	0	0	0	0	0	1	0	0	SEARO	Nepal	0	1	0	2009.5	0	1	Pre-post study with randomized controls	1	0	3. Urban-rural mix	1	540	2	no intervention	academic detailing			Khanal S. Study the impact of academic detailing on childhood diarrhoea management to the primary healthcare providers in Nepal [master’s thesis]. [Penang (Malaysia)]: Universiti Sains Malaysia; 2010, 217 p.	Khanal S, Ibrahim MIM, Shankar PR, Palaian S, Mishra P. Evaluation of academic detailing programme on childhood diarrhoea management by primary healthcare providers in Banke district of Nepal. Journal of Health, Population and Nutrition. 2013;31(2):231-42.	Khanal S, Palaian S, Shankar PR, Mishra P, Ibrahim MIM. Impact of educational outreach visits by pharmacists on treatment of childhood diarrhoea - initial findings from Banke district, Nepal. South East Asian Journal of Medical Education. 2009;3(2):76-77.
258500001	0	0	1	1	0	0	0	0	0	0	0	1	0	0	SEARO	Bangladesh	0	0	1	2009.5	0	1	Pre-post study with randomized controls	1	0	3. Urban-rural mix	2	780	2	no intervention	in-service training + referral network + printed STG + other printed job aid			Alam N, Alam A, Fournier P. Medicine Sellers for Prevention and Control of Sexually Transmitted Infections: Effect of a Quasi-Experimental Training Intervention in Bangladesh. BioMed Research International. 2015; 2015:570340
258900001	0	1	0	2	0	0	1	0	0	0	0	0	0	0	AFRO	South Africa	0	1	0	2007.5	0	1	Post-only study with randomized controls	1	0	3. Urban-rural mix	3	6010	2	no intervention	in-service training + printed STG other job aid			Baumgartner JN, Morroni C, Mlobeli RD, Otterness C, Buga G, Chen M. Impact of a provider job aid intervention on injectable contraceptive continuation in South Africa. Studies in Family Planning. 2012;43(4):305-14.	Baumgartner JN, Morroni C, Mlobeli RD, Otterness C, Myer L, Janowitz B, Stanback J, Buga G. Timeliness of contraceptive reinjections in South Africa and its relation to unintentional discontinuation. International Family Planning Perspectives. 2007;33(2):66-74.
259500001	0	0	1	0	0	0	0	0	0	0	0	1	0	0	AFRO	Uganda	0	0	1	2011.5	0	1	Pre-post study with non-randomized controls	0	0	5. Rural only	1	610	2	no intervention	in-service training + supervision + pre-packaging + provision of medical products + provision of medical equipment + branding of HFs + non-performance-based financial incentive for HF + fee per service removed + printed patient recording form + printed STG			Awor P. Drug shops in integrated community case management of malaria, pneumonia and diarrhoea in Uganda. Appropriateness of care and adherence to treatment guidelines [dissertation]. [Bergen (Norway)]: University of Bergen; 2016. 120 p.	Awor P, Wamani H, Tylleskar T, Jagoe G, Peterson S. Increased access to care and appropriateness of treatment at private sector drug shops with integrated management of malaria, pneumonia and diarrhoea: a quasi-experimental study in Uganda. PLoS One. 2014;9(12):e115440.	Awor P, Wamani H, Bwire G, Jagoe G, Peterson S. Private sector drug shops in integrated community case management of malaria, pneumonia, and diarrhea in children in Uganda. The American Journal of Tropical Medicine and Hygiene. 2012;87(5 Suppl):92-6.	Awor P, Wamani H, Tylleskar T, Peterson S. Drug seller adherence to clinical protocols with integrated management of malaria, pneumonia and diarrhoea at drug shops in Uganda. Malaria Journal. 2015;14:277.
259900002	0	1	0	1	0	1	1	0	0	0	0	1	0	0	AFRO	Zambia	0	1	0	2011	0	1	Pre-post study with non-randomized controls	0	0	3. Urban-rural mix	2	1390	2	no intervention	in-service training + supervision + continuous quality improvement + provision of medical products + provision of medical equipment			Bazant E, Sarkar S, Banda J, Kanjipite W, Reinhardt S, Shasulwe H, Mulilo JMC, Kim YM. Effects of a performance and quality improvement intervention on the work in HIV-related care: a quasi-experiemental evaluation in Zambia. Human Resources for Health. 2014;12:73.	Kim YM, Banda J, Hiner C, Tholandi M, Bazant E, Sarkar S, Andrade ASA, Makwala C. Assessing the quality of HIV/AIDS services at military health facilities in Zambia. International Journal of STD & AIDS. 2013; 24:365-70.	Kim YM, Banda J, Kanjipite W, Sarkar S, Bazant E, Hiner C, Tholandi M, Reinhardt S, Njobvu PD, Kols A, Benavides B. Improving performance of Zambia Defence Force antiretroviral therapy providers: evaluation of a standards-based approach. Global Health: Science and Practice. 2013; 1(2):213-27.	Kols A, Kim YM, Bazant E, Necochea E, Banda J, Stender S. A standards-based approach to quality improvement for HIV services at Zambia Defence Force facilities: results and lessons learned. AIDS. 2015; 29 (Suppl 2):S145-53,
267200001	0	1	0	3	1	0	0	0	0	0	0	0	0	0	EMRO	Egypt	0	1	0	2011	0	1	Post-only study with randomized controls	1	0	3. Urban-rural mix	2	2520	2	no intervention	in-service training + supervision + other printed job aid + community education printed materials			El-Sayed H, Martines J, Rakha M, Zekry O, Abdel-Hak M, Abbas H. The effectiveness of the WHO training course on complementary feeding counseling in a primary care setting, Ismailia, Egypt. Journal of Egyptian Public Health Association. 2014; 89(1):1-8.
267400001	0	1	0	0	1	0	1	0	0	0	0	0	0	0	AMRO	Mexico	1	0	0	2011.5	0	1	Pre-post study with non-randomized controls	0	0	1. Urban +/- periurban	3	9870	2	no intervention	in-service training			Fritz J, Walker D, Cohen S, Angeles G, Lamadrid-Figueroa H. Can a simulation-based training program impact the use of evidence based routine practices at birth? Results of a hospital-based controlled trial in Mexico. Poster session presented at: Global Maternal Newborn Health Conference; 2015 Oct 18-21; Mexico City, Mexico.	Lamadrid-Figueroa H. Impact of PRONTO: results of a cluster randomized trial in Mexico. Paper presented at: Global Maternal Newborn Health Conference; 2015 Oct 18-21; Mexico City, Mexico.	Fritz J, Walker D, Cohen S, Angeles G, Lamadrid-Figueroa H. Can a simulation-based training program impact the use of evidence based routine practices at birth? Results of a hospital-based controlled trial in Mexico. Currently under review. 2016.	Walker D, Cohen S, Fritz J, Olvera M, Lamadrid-Figueroa H, Cowan JG, Hernandez DG, Dettinger JC, Fahey JO. Team training in obstetric and neonatal emergencies using highly realistic simulation in Mexico: impact on process indicators. BMC Pregnancy and Childbirth. 2014; 14:367.	Walker D, Cohen SR, Fritz J, Olvera-Garcia M, Zelek ST, Fahey JO, Romero-Martinez M, Montoya-Rodriguez A, Lamadrid-Figueroa H. Impact evaluation of PRONTO Mexico: a simulation-based program in obstetric and neonatal emergencies and team training. Simulation in Healthcare. 2016; 11(1):1-9.	Fritz J, Walker DM, Cohen S, Angeles G, Lamadrid-Figueroa H. Can a simulation-based training program impact the use of evidence based routine practices at birth? Results of a hospital-based cluster randomized trial in Mexico. PLoS ONE. 2017; 12(3):e0172623.
267600001	0	1	0	0	1	0	0	0	0	0	0	0	0	0	AFRO	Nigeria	0	1	0	2013	0	1	Pre-post study with non-randomized controls	0	0	1. Urban +/- periurban	2	2700	2	no intervention	in-service training + audit with in-person feedback + printed STG other job aid			Garba MA, Mustapha GM, Rejoice C, Mustapha B, Alhaji MA, Bello IA, Hassan AE. Competence-based learning: The effectiveness of targeted resident education and clinical auditing feedback on completed death certificate accuracy rates. Nigerian Journal of Paediatrics. 2015; 42(2):132-6.
267900001	0	1	1	3	1	0	0	0	0	0	0	0	0	0	EMRO	Iran (Islamic Republic of)	0	1	0	2003	0	1	Post-only study with randomized controls	1	0	1. Urban +/- periurban	3	2180	2	no intervention	in-service training			Garjani A, Salimnejad M, Shamsmohamadi M, Baghchevan V, Vahidi RG, Maleki-Dijazi N, Rezazadeh H. Effect of interactive group discussion among physicians to promote rational prescribing. Eastern Mediterranean Health Journal. 2009;15(2):408-15.
268500001	0	1	0	2	1	0	1	0	0	0	0	0	0	0	WPRO	China	1	1	0	2008.5	0	1	Post-only study with randomized controls	1	0	4. Town +/- rural	3	3690	3	no intervention	In-service training (health education)	In-service training (clinical skills)		Zhang WH, Raven J, Zhang TH, Shen Y, Huang K, Long Q, Klemetti R, Temmerman M, Hemminki E and the CHIMACA study group. (2010). Implementation of interventions in the CHIMACA project. THL discussion paper 13, THL, University print, Helsinki, Finland.	Zhang WH, Raven J, Zhang TH, Shen Y, Huang K, Long Q, Klemetti R, Temmerman M, Hemminki E, the CHIMACA study group. Implementation of interventions in the CHIMACA project. National Institute for Health and Welfare (THL), Discussion papers 13/2010. Helsinki 2010.	Hemminki E, Long Q, Zhang WH, Wu Z, Raven J, Tao F, Yan H, Wang Y, Klemetti R, Zhang T, Regushevskaya E, Tang S. Impact of financial and educational interventions on maternity care: results of cluster randomized trials in rural China, CHIMACA. Maternal and Child Health Journal. 2013;17(2):208-21.
268500002	0	1	0	1	1	0	1	0	1	0	0	0	0	0	WPRO	China	1	1	0	2008.5	0	1	Post-only study with randomized controls	1	0	4. Town +/- rural	3	3690	3	no intervention	conditional cash transfer to household + non-health community education	In-service training		Zhang WH, Raven J, Zhang TH, Shen Y, Huang K, Long Q, Klemetti R, Temmerman M, Hemminki E, the CHIMACA study group. Implementation of interventions in the CHIMACA project. National Institute for Health and Welfare (THL), Discussion papers 13/2010. Helsinki 2010.	Long Q, Huang K, Shen Y, Hemminki E. Community-based randomised financial interventions for prenatal care: lesson from implementation in two rural counties in China. https://www.thl.fi/documents/189940/1590285/Financial-intervention-30012012.pdf/33c3ac8e-df49-41cd-9545-3486c4ffa00a	Hemminki E, Long Q, Zhang WH, Wu Z, Raven J, Tao F, Yan H, Wang Y, Klemetti R, Zhang T, Regushevskaya E, Tang S. Impact of financial and educational interventions on maternity care: results of cluster randomized trials in rural China, CHIMACA. Maternal and Child Health Journal. 2013;17(2):208-21.
268500003	0	1	0	2	1	0	1	0	1	0	0	0	0	0	WPRO	China	1	1	0	2008.5	0	1	Post-only study with randomized controls	1	0	4. Town +/- rural	3	3690	3	no intervention	In-service training (health education)	In-service training (clinical skills)		Zhang WH, Raven J, Zhang TH, Shen Y, Huang K, Long Q, Klemetti R, Temmerman M, Hemminki E and the CHIMACA study group. (2010). Implementation of interventions in the CHIMACA project. THL discussion paper 13, THL, University print, Helsinki, Finland.	Hemminki E, Long Q, Zhang WH, Wu Z, Raven J, Tao F, Yan H, Wang Y, Klemetti R, Zhang T, Regushevskaya E, Tang S. Impact of financial and educational interventions on maternity care: results of cluster randomized trials in rural China, CHIMACA. Maternal and Child Health Journal. 2013;17(2):208-21.
268500005	0	1	0	1	1	0	0	0	1	0	0	0	0	0	WPRO	China	1	1	0	2008.5	0	1	Post-only study with randomized controls	1	0	4. Town +/- rural	3	3690	2	no intervention	In-service training			Zhang WH, Raven J, Zhang TH, Shen Y, Huang K, Long Q, Klemetti R, Temmerman M, Hemminki E and the CHIMACA study group. (2010). Implementation of interventions in the CHIMACA project. THL discussion paper 13, THL, University print, Helsinki, Finland.	Hemminki E, Long Q, Zhang WH, Wu Z, Raven J, Tao F, Yan H, Wang Y, Klemetti R, Zhang T, Regushevskaya E, Tang S. Impact of financial and educational interventions on maternity care: results of cluster randomized trials in rural China, CHIMACA. Maternal and Child Health Journal. 2013;17(2):208-21.
269600001	0	0	1	3	1	0	1	0	0	1	0	0	0	0	AFRO	Nigeria	0	1	0	2013	0	1	Pre-post study with randomized controls	1	0	1. Urban +/- periurban	2	2700	2	no intervention	peer education + in-service training + training of managers + supervision + electronic reminder for HCP + provision of medical products + performance-based non-financial incentive for HCP + printed pamphlet for HCP + other printed job aid + printed STG bul			Abt. Association Inc. (Bethesda, MD). Impact of Offering Family Planning and Business Trainings to Private Facilities in Nigeria; 2015. 4 p. The Strengthening Health Outcomes through the Private Sector Project No.: AID-620-LA11-00001	Johnson D, Woodman B, Baruwa S, Toriola M, Chatterji M, Kinnan C, Jackson J, Carmona A. A Census of Private Health Facilities in Six States of Nigeria. Bethesda, MD: Strengthening Health Outcomes through the Private Sector Project, Abt Associates Inc. 2014. 70 p. Cooperative Agreement No.: AID-620-LA-11-00001	Ugaz J, Leegwater A, Chatterji M, Johnson D, Baruwa S, Toriola M, Kinnan C, Keeley R, Iroko A. Impact of family planning and business trainings on private sector health providers: Evidence from a randomized experiment in Nigeria. Bethesda (MD): Strengthening Health Outcomes through the Private Sector Project, Abt Associates Inc; 2015. 52 p. Supported by USAID. Cooperative Agreement no.: AID-620-L…	Ugaz J, Leegwater A, Chatterji M, Johnson D, Baruwa S, Toriola M, Kinnan C. Impact of family planning and business trainings on private-sector health care providers in Nigeria. International Perspectives on Sexual and Reproductive Health. 2017; 43(2):TK-TK.
270900001	0	0	1	3	0	0	0	0	0	0	0	1	0	0	SEARO	India	0	0	1	2013	0	1	Post-only study with randomized controls	1	0	5. Rural only	2	1520	2	no intervention	In-service training			Das J, Chowdhury A, Hussam R, Banerjee AV. The impact of training informal health care providers in India: A randomized controlled trial. Science. 2016 7;354(6308)	Das J, Chowdhury A, Hussam R, Banerjee AV. Project Brief for Das J, et. al. The impact of training informal health care providers in India: A randomized controlled trial. Science. 2016 Oct 6; 2 p.
271200001	0	1	0	2	0	1	1	0	0	0	0	0	0	0	AFRO	Kenya	0	1	0	2010	0	1	Post-only study with randomized controls	1	0	5. Rural only	2	980	2	no intervention	in-service training			Jenkins, Rachel. Value for money of a 40 hour mental health CPD training course in Kenya for primary care health workers. 2015. 3 p.	Jenkins R, Othieno C, Okeyo S, Kaseje D, Aruwa J, Oyug H, Bassett P, Kauye F. Short structured general mental health in service training programme in Kenya improves patient health and social outcomes but not detection of mental health problems - a pragmatic cluster randomised controlled trial. International Journal of Mental Health Systems. 2013; 7:25.	Jenkins R, Othieno C, Okeyo S, Aruwa J, Wallcraft J, Jenkins B. Exploring the perspectives and experiences of health workers at primary health facilities in Kenya following training. International Journal of Mental Health Systems. 2013; 7:6.	Jenkins R, Othieno C, Okeyo S, Aruwa J, Kingora J, Jenkins B. Health systems challenges to integration of mental health delivery in primary care in Kenya - perspectives of primary care health workers. BMC Health Services Research. 2013; 13:368.	Othieno C, Jenkins R, Okeyo S, Aruwa J, Wallcraft J, Jenkins B. Perspectives and concerns of clients at primary health care facilities involved in evaluation of a national mental health training programme for primary care in Kenya. International Journal of Mental Health Systems. 2013; 7(5):1-7.	Jenkins R, Kiima D, Njenga F, Okonji M, Kingora J, Kathuku D, Lock S. Integration of mental health into primary care in Kenya. World Psychiatry. 2010; 9(2): 118-20.	Jenkins R, Kiima D, Okonji M, Njenga F, Kingora J, Lock S. Integration of mental health into primary care and community health working in Kenya: context, rationale, coverage and sustainability. Mental Health in Family Medicine. 2010; 7(1): 37-47.
271600001	0	1	0	2	0	0	1	0	0	0	0	0	0	0	AFRO	Benin	0	0	1	2008	0	1	Pre-post study with randomized controls	1	0	6. Unclear or not stated	1	750	2	no intervention	In service training + supervision + team-based problem solving + other printed job aid			Jennings L. Quality and impact of maternal and newborn care counseling by skilled and lay health providers in Zou/Collines, Benin [dissertation]. [Baltimore]:John Hopkins University. 2009. 200 p.	Jennings L, Yebadokpo AS, Affo J, Agbogbe M. Antenatal counseling in maternal and newborn care: use of job aids to improve health worker performance and maternal understanding in Benin. BMC Pregnancy Childbirth. 2010;10:75.	Jennings L, Yebadokpo A, Affo J, Agbogbe M. Use of job aids to improve facility-based postnatal counseling and care in rural Benin. Maternal Child Health Journal. 2015;19(3):557-65.
271800001	0	1	0	0	1	1	1	0	0	0	0	1	1	0	AFRO	Malawi	1	1	0	2004.5	0	1	Pre-post study with randomized controls	1	0	5. Rural only	1	290	2	no intervention	in-service training + peer education			Jere DL, Kaponda CPN, Chimwaza A, Crittenden KS, Kachingwe ST, McCreary L, Norr JL, Norr K. Improving universal precautions and client teaching for rural health workers: a peer-group intervention. AIDS Care. 2010; 22(5):649-57.	Norr K, Kaponda CPN, Dancy BL, Jere DL, Kachingwe SI, Kafulafula U, McCreary LL, Mbeba MM, Norr JL, Talashek ML. A primary health care intervention to mobilize health workers for HIV prevention in Malawi. Primary Health Care Research and Development. 2006; 7:318-30.	Talashek ML, Kaponda CPN, Jere DL, Kafulafula U, Mbeba MM, McCreary LL, Norr K. Identifying what rural health workers in Malawi need to become HIV prevention leaders. Journal of the Association of Nurses in AIDS Care. 2007; 18(4):41-50.	Mbeba M, Kaponda CPN, Jere DL, Kachingwe SI, Crittenden KS, McCreary LL, Norr JL, Norr KF. Peer group intervention reduces personal HIV risk for Malawian health workers. Journal of Nursing Scholarship. 2011; 43(1):72-81.	Kaponda CPN, Jere DL, Chimango JL, Chimwaza AF, Crittenden KS, Kachingwe SI, McCreary LL, Norr JL, Norr KF. Impacts of a peer-group intervention on HIV-related knowledge, attitudes, and personal behaviors for urban hospital workers in Malawi. Journal of the Association of Nurses in AIDS Care. 2009; 20(3):230-42.
273200001	0	0	0	3	0	0	0	0	1	0	0	0	0	0	AFRO	Malawi	0	1	0	2008.5	0	1	Pre-post study with randomized controls	1	0	6. Unclear or not stated	1	390	2	in-service training (3-day)	in-service training (5-day) + printed STG other job aid			Kauye F, Jenkins R, Rahman A. Training primary health care workers in mental health and its impact on diagnoses of common mental disorders in primary care of a developing country, Malawi: a cluster-randomized controlled trial. Psychological Medicine. 2014; 44(3):657-66.
273300001	0	1	0	1	1	0	1	0	0	0	0	0	0	0	WPRO	Malaysia	0	1	0	2010	0	1	Pre-post study with non-randomized controls	0	0	3. Urban-rural mix	3	8240	2	no intervention	in-service training + audit with in-person feedback + provision of medical equipment + printed patient recording form + other printed job aid + printed STG (other) + patient education printed materials			Khoo EM, Sararaks S, Lee WK, Liew SM, Cheong AT, Samad AA, Maskon K, Hamid MA. Reducing medical errors in primary care using a pragmatic complex intervention. Asia-Pacific Journal of Public Health. 2015; 27(6): 670-7.	Khoo EM, Lee WK, Sararaks S, Samad AA, Liew SM, Cheong AT, Ibrahim MY, Su SHC, Hanafiah ANM, Maskon K, Ismail R, Hamid MA. Medical errors in primary care clinics - a cross sectional study. BMC Family Practice. 2012; 13:127.
273700001	0	1	0	0	1	0	1	0	1	0	0	0	0	0	EMRO	Pakistan	1	1	0	2013.5	1	1	Pre-post study with randomized controls	1	0	1. Urban +/- periurban	2	1390	2	no intervention	in-service training + non-supervisors help HCP + provision of medical equipment			Kumar R, Somrongthong R, Shaikh BT. Effectiveness of intensive healthcare waste management training model among health professionals at teaching hospitals of Pakistan: a quasi-experimental study. BMC Health Services Research. 2015;15:81.	Kumar R, Samrongthong R, Shaikh BT. Knowledge, attitude and practices of health staff regarding infectious waste handling of tertiary care health facilities at metropolitan city of Pakistan. Journal of Ayub Medical College Abbottabad. 2013;25(1-2):109-12.	Kumar R, Somrongthong R, Ahmed J. Impact of waste management training intervention on knowledge, attitude and practices of teaching hospital workers in Pakistan. Pakistan Journal of Medical Sciences. 2016; 32(3):705-10.	Kumar R, Somrongthong R, Ahmed J. Effect of medical waste management trainings on behavior change among doctors versus nurse and paramedical staff in Pakistan. Journal of Ayub Medical College Abottabad, 2016; 28(3):493-6.
274300001	0	1	1	2	1	0	1	1	0	0	0	1	0	0	AFRO	Cameroon	0	1	0	2011	0	1	Post-only study with randomized controls	1	0	3. Urban-rural mix	2	1380	3	no intervention	peer education + in-service training (1 day) + provision of medical products + fee per service introduced + performance-based non-financial incentive for HCP + printed poster for HCP + printed STG other job aid	peer education + in-service training (3 days) + provision of medical products + fee per service introduced + performance-based non-financial incentive for HCP + printed poster for HCP + printed STG other job aid		Mbacham WF, Mangham-Jefferies L, Cundill B, Achonduh OA, Chandler CIR, Ambebila JN, Nkwescheu A, Forsah-Achu D, Ndiforchu V, Tchekountouo O, Akindeh-Nji M, Ongolo-Zogo P, Wiseman V. Basic or enhanced clinician training to improve adherence to malaria treatment guidelines: a cluster-randomised trial in two areas of Cameroon. Lancet Global Health. 2014; 2(6):e346-58.	Mangham-Jefferies L, Wiseman V, Achonduh OA, Drake TL, Cundill B, Onwujekwe O, Mbacham W. Economic evaluation of a cluster randomized trial of interventions to improve health workers' practice in diagnosing and treating uncomplicated malaria in Cameroon. Value in Health. 2014; 17(8):783-91.	Mangham LJ, Cundill B, Achonduh OA, Ambebila JN, Lele AK, Metoh TN, Ndive SN, Ndong IC, Nguela RL, Nji AM, Orang-Ojong B, Wiseman V, Pamen-Ngako J, Mbacham WF. Malaria prevalence and treatment of febrile patients at health facilities and medicine retailers in Cameroon. Tropical Medicine and International Health. 2012; 17(3):330-42.	Wiseman V, Mangham LJ, Cundill B, Achonduh OA, Nji AM, Njei AN, Chandler C, Mbacham WF. A cost-effectiveness analysis of provider interventions to improve health worker practice in providing treatment for uncomplicated malaria in Cameroon: a study protocol for a randomized controlled trial. Trials. 2012; 13:4	Mangham-Jefferies L, Hanson K, Mbacham W, Onwujekwe O, Wiseman V. Mind the gap: knowledge and practice of providers treating uncomplicated malaria at public and mission health facilities, pharmacies and drug stores in Cameroon and Nigeria. Health Policy and Planning. 2015; 30(9):1129-41	Chandler CIR, Mangham L, Njei AN, Achonduh O, Mbacham WF, Wiseman V. 'As a clinician, you are not managing lab results, you are managing the patient': how the enactment of malaria at health facilities in Cameroon compares with new WHO guidelines for the use of malaria tests. Social Science & Medicine. 2012; 74(10): 1528-35.	Achonduh OA, Mbacham WF, Mangham-Jefferies L, Cundill B, Chandler C, Pamen-Ngako J, Lele AK, Ndong IC, Ndive SN, Ambebila JN, Orang-Ojong BB, Metoh TN, Akindeh-Nji M, Wiseman V. Designing and implementing interventions to change clinicians' practice in the management of uncomplicated malaria: lessons from Cameroon. Malaria Journal. 2014;13:204.	Hopkins H, Bruxvoort KJ, Cairns ME, Chandler CI, Leurent B, Ansah EK, Baiden F, Baltzell KA, Björkman A, Burchett HE, Clarke SE, DiLiberto DD, Elfving K, Goodman C, Hansen KS, Kachur SP, Lal S, Lalloo DG, Leslie T, Magnussen P, Jefferies LM, Mårtensson A, Mayan I, Mbonye AK, Msellem MI, Onwujekwe OE, Owusu-Agyei S, Reyburn H, Rowland MW, Shakely D, Vestergaard LS, Webster J, Wiseman VL, Yeung S, …
274800001	0	1	0	0	1	0	0	0	0	0	0	0	0	0	WPRO	Malaysia	0	1	0	2004	0	1	Pre-post study with non-randomized controls	0	0	2. Periurban only	3	4740	2	no intervention	academic detailing + other printed job aid			Teng CL, Achike FI, Phua KL, Nurjahan MI, Mastura I, Asiah HN, Mariam AM, Narayanan S, Norsiah A, Sabariah I, Shariah I, Rokiah KS, Zubaidah MA, Koh CN, Rosnah I. Modifying antibiotic prescribing: the effectiveness of academic detailing plus information leaflet in a Malaysian primary care setting. The Medical Journal of Malaysia. 2006; 61(3):323-31.	Mastura I, Teng CL. The effect of ‘group detailing’ on drug prescribing in primary care. The Medical Journal of Malaysia. 2008; 63(4): 315-8.
275400001	0	1	1	0	1	0	0	0	1	1	0	1	1	0	SEARO	Bangladesh	0	1	0	2002.5	0	1	Pre-post study with non-randomized controls	0	0	6. Unclear or not stated	2	450	2	no intervention	patient recording form + printed STG other job aid + in-service training			Mercer AJ, Hossain S, Khatun J, Kabir H, Saha N, Uddin J, Hasan Y. Screening for service needs in primary health care clinics: an evaluation in Bangladesh. Journal of Health and Population in Developing Countries. 2005.
275700001	0	0	1	1	0	0	0	1	0	0	0	1	0	0	AMRO	Dominican Republic	0	0	1	2009.5	0	1	Pre-post study with non-randomized controls	0	0	1. Urban +/- periurban	3	5230	2	no intervention	academic detailing + in-service training + non-medical commodity supply + printed management info system + non-performance-based non-financial incentive for HCP + printed poster for HCP + other printed job aid + community education printed materials			Mitchell EMH, Perez-Then E, Orejel-Juarez I, Baez J, Gonzales F, Morrobel AL, Marcelino B, Kamp, N. Effectiveness of interventions to increase referral of clients exhibiting TB symptoms by pharmacies and corner stores in Santo Domingo, Dominican Republic. The Open Infectious Diseases Journal. 2013; 7(Suppl 1:M5):47-53.
275900001	0	1	0	0	1	0	0	0	0	0	0	0	0	0	SEARO	India	0	1	0	2009	0	0	Pre-post study with non-randomized controls	0	0	6. Unclear or not stated	2	1110	2	no intervention	in service training + other printed job aid			Nanda P, Mishra A, Mukherjee S, Barua A, Mehl GL, Venkatraman CM. A study to evaluate the effectiveness of WHO tools--Orientation Programme on Adolescent Health for Health Care Providers and Adolescent Job Aid--in improving the quality of health services provided by health workers to their female adolescent clients in India. Geneva: WHO Press; 2012. 74 p. Report of a WHO, UNFPA, UNICEF Study Group
276000001	0	1	0	0	0	0	1	0	0	0	0	0	0	0	WPRO	Viet Nam	1	0	0	2012	0	1	Pre-post study with non-randomized controls	0	0	6. Unclear or not stated	2	1550	2	no intervention	in-service training + printed STG other job aid + printed poster for HCP			Nguyen HT, Pham HT, Vo DK, Nguyen TD, van den Heuvel ER, Haaijer-Ruskamp FM, Taxis K. The effect of a clinical pharmacist-led training programme on intravenous medication errors: a controlled before and after study. BMJ Quality and Safety. 2014; 23(4): 319-24.	Nguyen HT, Nguyen TD, van den Heuvel ER, Haaijer-Ruskamp FM, Taxis K. Errors in medicines preparation and administration in Vietnamese hospitals. Poster session presented at: 18th Congress of the European Association of Hospital Pharmacists; 2013 Mar 13-15; Paris, France.	Nguyen HT, Nguyen TD, van den Heuvel ER, Haaijer-Ruskamp FM, Taxis K. Medication errors in Vietnamese hospitals: prevalence, potential outcome and associated factors. PLoS One. 2015 Sep 18;10(9).
276100001	0	1	0	3	1	0	0	0	0	0	0	0	0	0	EMRO	Pakistan	1	0	0	2009	0	1	Post-only study with randomized controls	1	0	1. Urban +/- periurban	2	1060	2	no intervention	in-service training			Bin Nisar Y, Hafeez A, Zafar S, Southall DP. Impact of essential surgical skills with an emphasis on emergency maternal, neonatal and child health training on the practice of doctors: a cluster randomised controlled trial in Pakistan. Resuscitation. 2011; 82(8):1047-52.
278790101	0	1	0	1	1	0	0	0	0	0	0	0	0	0	AMRO	Mexico	0	1	0	1999.5	0	1	Pre-post study with non-randomized controls	0	0	1. Urban +/- periurban	3	5810	2	no intervention	in-service training (group) + HCP group process + printed STG newsletter + printed STG poster			Reyes-Morales H, Flores-Hernández S, Tomé-Sandoval P, Pérez-Cuevas R. A multifaceted education intervention for improving family physicians' case management. Family Medicine. 2009; 41(4): 277-84.
278790102	0	1	0	1	1	0	0	0	0	0	0	0	0	0	AMRO	Mexico	0	1	0	1999.5	0	1	Pre-post study with non-randomized controls	0	0	1. Urban +/- periurban	3	5810	2	no intervention	in-service training (group&individual) + HCP group process + printed STG newsletter + printed STG poster			Reyes-Morales H, Flores-Hernández S, Tomé-Sandoval P, Pérez-Cuevas R. A multifaceted education intervention for improving family physicians' case management. Family Medicine. 2009; 41(4): 277-84.
278790103	0	1	0	1	1	0	0	0	0	0	0	0	0	0	AMRO	Mexico	0	1	0	1999.5	0	1	Pre-post study with non-randomized controls	0	0	1. Urban +/- periurban	3	5810	2	no intervention	in-service training (group&individual) + peer review + HCP group process + printed STG newsletter + printed STG poster			Reyes-Morales H, Flores-Hernández S, Tomé-Sandoval P, Pérez-Cuevas R. A multifaceted education intervention for improving family physicians' case management. Family Medicine. 2009; 41(4): 277-84.
279000001	0	0	0	3	0	0	0	0	0	0	1	0	0	0	SEARO	India	0	0	1	2011	0	1	Pre-post study with randomized controls	1	0	1. Urban +/- periurban	2	1380	2	no intervention	pre-service training			Sangappa SB, Tekian A. Communication skills course in an Indian undergraduate dental curriculum: a randomized controlled trial. Journal of Dental Education. 2013; 77(8):1092-8.
279200001	0	1	0	0	1	0	1	0	0	0	0	1	1	0	SEARO	Nepal	1	1	0	2011.5	1	1	Pre-post study with non-randomized controls	0	0	3. Urban-rural mix	1	690	2	no intervention	in-service training + peer review + supervision + team-based problem solving + decentralized management of HCP + provision of medical equipment + government funds for health sector			Public Health and Infectious Diseases Research Center (Kathmandu, Nepal). Final evaluation of the partnership for maternal and neonatal health project in Arghakhanchi and Kapilbastu districts, Nepal. 2013, p.23. Cooperative Agreement No.: GHN-A-00-09-00019-00. Supported by USAID	Shrestha JR, Manandhar DS, Manandhar SR, Adhikari D, Rai C, Rana H, Poudel M, Pradhan A. Maternal and Neonatal Health Knowledge, Service Quality and Utilization: Findings from a Community Based Quasi-experimental Trial in Arghakhanchi District of Nepal. Journal of Nepal Health Research Council. 2015;13(29):78-83
279300001	0	0	1	2	1	0	0	0	0	0	0	0	0	0	AMRO	Brazil	0	1	0	2008	0	1	Pre-post study with randomized controls	1	0	1. Urban +/- periurban	3	7400	3	no intervention	printed STG literature	academic detailing + printed STG literature		Silva JM, Stein AT, Schunemann HJ, Bordin R, Kuchenbecker R, de Lourdes Drachler M. Academic detailing and adherence to guidelines for Group B streptococci prenatal screening: a randomized controlled trial. BMC Pregnancy and Childbirth. 2013; 13:68.
281500001	0	1	1	0	0	0	0	0	0	0	0	0	0	1	AFRO	Uganda	0	1	0	2004	0	0	Pre-post study with non-randomized controls	0	0	6. Unclear or not stated	1	270	2	no intervention	in-service training + unspecified community education			Van Roekel K. Khalid M, Seru M (John Snow, Inc. Kampala, Uganda). Rational injection use in Uganda: an in-depth analysis of outpatient records in five districts. Making medical injections safer (MMIS) project study report. U.S. Agency for International Development. 2009. 88p. Contract no.: GHS-I-00-03-0026-00.
281600001	0	1	0	2	0	0	0	0	0	0	1	0	0	0	AMRO	Mexico	0	0	1	2006.5	0	1	Post-only study with randomized controls	1	0	1. Urban +/- periurban	3	9190	2	placebo training	pre-service training			Sánchez-Mendiola M, Kieffer-Escobar LF, Marín-Beltrán S, Downing SM, Schwartz A. Teaching of evidence-based medicine to medical students in Mexico: a randomized controlled trial. BMC Medical Education. 2012; 12:107.
281700001	0	1	0	0	0	0	1	0	0	0	0	0	0	0	SEARO	India	1	0	0	2011	0	1	Pre-post study with non-randomized controls	0	0	1. Urban +/- periurban	2	1380	2	no intervention	in-service training			Varghese NC, Macaden L, Premkumar B, Mathews P, Kumar S. Delirium in older people in hospital: an education programme. British Journal of Nursing. 2014; 23(13):704-9.
281800001	0	1	1	1	1	0	1	0	0	0	0	0	0	0	AFRO	Ethiopia	0	1	0	2009	0	1	Pre-post study with non-randomized controls	0	0	1. Urban +/- periurban	1	340	2	no intervention	in-service training + supervision + provision of laboratory + provision of medical products + provision of medical equipment + fee per service introduced + donation by individuals + other printed job aid + patient education printed materials+ printed STG			Villadsen SF, Negussie D, GebreMariam A, Tilahun A, Friis H, Rasch V. Antenatal care strengthening for improved quality of care in Jimma, Ethiopia: an effectiveness study. BMC Public Health. 2015; 15:360	Villadsen SF, Tersbøl BP, Negussie D, GebreMariam A, Tilahun A, Friis H, Rasch V. Antenatal care strengthening in Jimma, Ethiopia: a mixed-method needs assessment. Journal of Environmental and Public Health. 2014; 2014:945164
283500001	0	0	0	0	1	0	0	1	0	0	0	0	0	0	WPRO	China	0	1	0	2000.5	0	1	Pre-post study with non-randomized controls	0	0	6. Unclear or not stated	3	1010	2	no intervention	in-service training + monitoring + improved service utilization + HCP group process + feedback for HCP about problems found during daily inspection + essential drug list + fee per drug reduced + printed literature for HCP + printed pamphlet for HCP + print			Wang, Yu-qin et al. Multi-center indicator intervention research on rational drug use. 2007.	Chen L, Wang S, Wang Q, Shi L, Wang H, Li H, Xu Y, Gao Y, Wu M, Wu L, Wang Y. Multi-center controlled study on international indicators of rational drug use - on-site investigation. Chinese Journal of Hospital Pharmacy. 2003; 23(7): 438-440.
283700001	0	1	1	2	1	0	1	0	0	0	0	0	0	0	AFRO	South Africa	0	1	0	2013.5	0	1	Pre-post study with randomized controls	1	0	6. Unclear or not stated	3	6800	4	no intervention	in-service training (lecture) + printed STG other job aid	electronic HCP self-study + printed STG other job aid	printed HCP self-study + printed STG other job aid	Weaver MR, Pillay E, Jed SL, de Kadt J, Galagan S, Gilvydis J, Marumo E, Mawandia S, Naidoo E, Owens T, Prongay V, O'Malley G. Three methods of delivering clinic-based training on syndromic management of sexually transmitted diseases in South Africa: a pilot study. Sexually Transmitted Infections. 2016; 92(2):135-41.
284200001	0	1	0	1	0	0	1	0	0	0	0	0	0	0	WPRO	China	1	0	0	2005	0	1	Pre-post study with randomized controls	1	0	6. Unclear or not stated	3	1760	2	no intervention	in-service training + patient recording form			Zhang CH, Hsu L, Zou BR, Li JF, Wang HY, Huang J. Effects of a pain education program on nurses' pain knowledge, attitudes and pain assessment practices in China. Journal of Pain and Symptom Management. 2008; 36(6): 616-27.	Zhang CH, Xu LH, Zhu XP, Wang HY, Huang Y, Li JF, Zheng L. Research about the effect of pain-related education program on nurses’ attitude, knowledge and assessment practices of pains. Chinese Journal of Practical Nursing. 2010; 26 (2A):30-33. [Chinese]
284300001	0	1	1	3	1	0	1	0	0	0	0	0	0	0	WPRO	China	0	1	0	2007.5	0	1	Pre-post study with randomized controls	1	0	7. Periurban-town mix	3	3100	2	no intervention	in-service training + HF and HCPs were linked in a referral network + reorganization of HCP deployment + data collection in new or modified electronic management information system used to improve health services + performance-based financial incentive for			Zhang T, Guo L, Zhang S, Liu W, Chen G, Hui M, He G, van der Werf MJ, van den Hof S. Improving detection and notification of tuberculosis cases in students in Shaanxi province, China: an intervention study. BioMed Central Public Health. 2011; 11:147.
285800001	0	0	1	3	0	0	1	1	0	0	0	1	0	0	AFRO	Uganda	0	0	1	2011.5	0	1	Pre-post study with randomized controls	1	0	3. Urban-rural mix	1	610	2	no intervention	in-service training + supervision + improved medicine access + provision of drugs + reimbursement revised			Cohen J, Fink G, Maloney K, Berg K, Jordan M, Svoronos T, Aber F, Dickens W. Introducing rapid diagnostic tests for malaria to drug shops in Uganda: a cluster-randomized controlled trial. Bulletin of the World Health Organization. 2015; 93(3): 142-151.	Cohen J, Fink G, Berg K, Aber F, Jordan M, Maloney K, Dickens W. Feasibility of distributing rapid diagnostic tests for malaria in the retail sector: evidence from an implementation study in Uganda. PLoS One. 2012; 7(11): e48296.
287400001	0	0	1	3	1	0	1	1	0	0	0	1	0	0	AFRO	Kenya	0	0	1	2008.5	0	1	Pre-post study with randomized controls	1	0	5. Rural only	2	910	2	no intervention	in-service training + supervision + record keeping of medical products + fee per drug introduced + reimbursement revised + printed patient recording form + printed STG pamphlet + community education group meetings + community education printed materials +			Kangwana BP, Kedenge SV, Noor AM, Alegana VA, Nyandigisi AJ, Pandit J, Fegan GW, Todd JE, Snow RW, Goodman CA. The effect of an anti-malarial subsidy programme on the quality of service provision of artemisinin-based combination therapy in Kenya: a cluster-randomized, controlled trial. Malaria Journal. 2013; 12:81	Kangwana BP, Kedenge SV, Noor AM, Alegana VA, Nyandigisi AJ, Pandit J, Fegan GW, Todd JE, Brooker S, Snow RW, Goodman CA. The impact of retail-sector delivery of artemether-lumefantrine on malaria treatment of children under five in Kenya: a cluster randomized controlled trial. PLoS Medicine. 2011; 8(5):e1000437.	Kedenge SV, Kangwana BP, Waweru EW, Nyandigisi AJ, Pandit J, Brooker SJ, Snow RW, Goodman CA. Understanding the impact of subsidizing artemisinin-based combination therapies (ACTs) in the retail sector--results from focus group discussions in rural Kenya. PLoS One. 2013; 8(1):e54371.	Kangwana BP, Goodman CA, Fegan GW, Noor AM, Nyandigisi AJ, Akhwale WS, Pandit J, Snow RW. The impact of retail-sector delivery of artemether-lumefantrine on effective malaria treatment of children under five in Kenya. Trial Protocol. Supporting information from Kangwana BP et al. PLoS Medicine. 2011; 8(5):e1000437.
287700001	0	1	0	1	0	0	1	0	0	0	0	1	0	0	AFRO	South Africa	1	0	0	2010	0	1	Post-only study with randomized controls	1	0	1. Urban +/- periurban	3	6230	2	no intervention	in-service training + non-supervisors help HCP + printed literature for HCP + printed patient recording form			Kyriacos U, Jelsma J, James M, Jordan S. Early warning scoring systems versus standard observations charts for wards in South Africa: a cluster randomized controlled trial. Trials. 2015; 20;16:103.	Kyriacos U, Jelsma J, James M, Jordan S. Monitoring vital signs: development of a modified early warning scoring (MEWS) system for general wards in a developing country. PLoS One. 2014, 24;9(1):e87073
287800001	0	1	0	0	1	0	1	1	0	0	0	0	0	0	AFRO	Namibia	0	1	0	2011.5	0	1	Pre-post study with randomized controls	1	0	4. Town +/- rural	3	5510	4	no intervention	peer education + in-service training + printed literature for HCP + printed poster for HCP	peer education + in-service training + supervision + printed literature for HCP + printed poster for HCP	peer education + in-service training + electronic reminder for HCP + printed literature for HCP + printed poster for HCP	Lourenço C, Kandula D, Haidula L, Ward A, Cohen JM. Strengthening malaria diagnosis and appropriate treatment in Namibia: a test of case management training interventions in Kavango Region. Malaria Journal. 2014; 13:508.
287900001	0	1	0	1	0	0	1	0	0	0	0	0	0	0	AFRO	South Africa	0	1	0	2012.5	0	1	Pre-post study with non-randomized controls	0	0	3. Urban-rural mix	3	7400	2	no intervention	in-service training + printed patient recording form + printed STG literature			Mahomed OH, Naidoo S, Asmall S, Taylor M. Improving the quality of nurse clinical documentation for chronic patients at primary care clinics: a multifaceted intervention. Curationis. 2015; 38 (1).
288000001	0	0	1	0	0	0	0	0	1	0	0	0	0	0	AFRO	United Republic of Tanzania	0	0	1	2013.5	0	1	Pre-post study with randomized controls	1	0	5. Rural only	1	920	3	no intervention	in-service training + supervision + improved medicine access (regular retail price) + introduction of wholesaler + provision of medical equipment + performance-based non-financial incentive for HCP + HF award + printed STG (other job aid)	in-service training + supervision + improved medicine access (lower retail price) + introduction of wholesaler + provision of medical equipment + performance-based non-financial incentive for HCP + HF award + printed STG (other job aid)		Maloney K, Ward A, Krenz B, Dolkart CF, Bryson L, Le Menach A, Cohen JM, Mtumbuka E, Mkude S. Malaria testing and treatment in Tanzania after introduction of rapid diagnostic tests in accredited drug dispensing outlets. Poster presented at American Society of Tropical Medicine and Hygiene (ASTMH) 63rd Annual Meeting; 2014, Nov 02 - 06, 2014; New Orleans, Louisiana.	Ward A, Krenz B, Maloney K, Dolkart CF, Le Menach A, Cohen JM, Mtumbuka E, Mkude S. Drug shop dispensers demonstrate high performance in malaria RDT administration and safety in ADDOs in Tanzania. Poster presented at American Society of Tropical Medicine and Hygiene (ASTMH) 63rd Annual Meeting; 2014, Nov 02 - 06, 2014; New Orleans, Louisiana.	Maloney K, Ward A, Krenz B, Petty N, Bryson L, Dolkart C, Visser T, Le Menach A, Scott VK, Cohen JM, Mtumbuka E, Mkude S. Expanding access to parasite-based malaria diagnosis through retail drug shops in Tanzania: evidence from a randomized trial and implications for treatment. Malaria Journal. 2017; 16(1):6.
288700001	0	0	1	0	0	0	0	0	0	0	0	1	0	0	AFRO	Malawi	0	0	1	2004.5	0	1	Pre-post study with non-randomized controls	0	0	1. Urban +/- periurban	1	290	2	no intervention	in-service training + supervision + referral network + community scorecard + patient recording form + other printed job aid + printed STG other job aid + health-related supply for community			Simwaka BN, Theobald S, Willets A, Salaniponi FM, Nkhonjera P, Bello G, Squire SB. Acceptability and effectiveness of the storekeeper-based TB referral system for TB suspects in sub-districts of Lilongwe in Malawi. PLoS One. 2012;7(9): e39746.
289000001	0	1	0	0	0	0	1	0	0	0	0	0	0	0	SEARO	Sri Lanka	0	1	0	2008.5	0	1	Pre-post study with randomized controls	1	0	5. Rural only	2	2020	2	no intervention	in-service training + printed patient recording form + community education group meetings + community home visits + health-related supply for community			Vithana PVSC, Ariyaratne MAY, Jayawardana PL. Effectiveness of an educational intervention among public health midwives on breast cancer early detection in the district of Gampaha, Sri Lanka. Asian Pacific Journal of Cancer Prevention. 2015; 16(1):227-32.	Vithana PVSC, Ariyaratne MAY, Jayawardana PL. Educational intervention on breast cancer early detection: effectiveness among target group women in the district of Gampaha, Sri Lanka. Asian Pacific Journal of Cancer Prevention. 2015; 16(6):2547-53.
289400001	0	1	0	3	0	0	1	0	0	0	0	0	0	0	EMRO	Iran (Islamic Republic of)	1	0	0	2009	0	1	Pre-post study with randomized controls	1	0	6. Unclear or not stated	3	5460	2	no intervention	in-service training + printed pamphlet for HCP			Yousefi H, Nahidian M, Sabouhi F. Reviewing the effects of an educational program about sepsis care on knowledge, attitude, and practice of nurses in intensive care units. Iranian Journal of Nursing and Midwifery Research. 2012; 17 (2 Suppl 1):S91-5.
289600001	0	1	0	2	0	0	1	0	0	0	0	0	0	0	AFRO	South Africa	0	1	0	2004.5	0	1	Post-only study with randomized controls	1	0	3. Urban-rural mix	3	5020	2	no intervention	in-service training + printed STG other job aid			Zwarenstein M, Fairall LR, Lombard C, Mayers P, Bheekie A, English RG, Lewin S, Bachmann MO, Bateman E. Outreach education for integration of HIV/AIDS care, antiretroviral treatment, and tuberculosis care in primary care clinics in South Africa: PALSA PLUS pragmatic cluster randomised trial. British Medical Journal. 2011; 342:d2022.
291100001	0	1	0	2	0	1	1	1	0	0	0	0	0	0	AFRO	United Republic of Tanzania	0	1	0	2007	0	1	Pre-post study with randomized controls	1	0	1. Urban +/- periurban	1	510	2	no intervention	peer education + in-service training + supervision + HCP group process + provision of medical products			D'Acremont V. Massive reduction of antimalarial prescriptions during programmatic implementation of Rapid Diagnostic Test in Dar es Salaam, Tanzania. Paper presented at the 6th European Congress on Tropical Medicine and International Health. 2009 Sept 6-10; Verona, Italy.	D'Acremont V. Understanding and improving malaria diagnosis in health facilities in Dar es Salaam, Tanzania [dissertation]. [Basel]: University of Basel; 2010. p. 150.	D'Acremont V, Kahama-Maro J, Swai N, Mtasiwa D, Genton B, Lengeler C. Reduction of anti-malarial consumption after rapid diagnostic tests implementation in Dar es Salaam: a before-after and cluster randomized controlled study. Malaria Journal. 2011; 10:107.	Yukich J, D'Acremont V, Kahama J, Swai N, Lengeler C. Cost savings with rapid diagnostic tests for malaria in low-transmission areas: evidence from Dar es Salaam, Tanzania. The American Journal of Tropical Medicine and Hygiene. 2010; 83(1):61-8.
292000001	0	1	0	0	0	1	1	1	0	0	0	1	0	0	AFRO	Uganda	0	1	0	2007	0	1	Interrupted time series with non-randomized controls	0	0	3. Urban-rural mix	1	370	2	no intervention	Peer education + in-service training + supervision + provision of medical products + provision of medical equipment + printed STG poster			Kyabayinze DJ, Asiimwe C, Nakanjako D, Nabakooza J, Counihan H, Tibenderana JK. Use of RDTs to improve malaria diagnosis and fever case management at primary health care facilities in Uganda. Malaria Journal. 2010; 9:200	Asiimwe C, Kyabayinze DJ, Kyalisiima Z, Nabakooza J, Bajabaite M, Counihan H, Tibenderana JK. Early experiences on the feasibility, acceptability, and use of malaria rapid diagnostic tests at peripheral health centres in Uganda-insights into some barriers and facilitators. Implementation Science. 2012; 7:5.	Kyabayinze DJ, Asiimwe C, Nakanjako D, Nabakooza J, Bajabaite M, Strachan C, Tibenderana JK, Van Geetruyden JP. Programme level implementation of malaria rapid diagnostic tests (RDTs) use: outcomes and cost of training health workers at lower level health care facilities in Uganda. BMC Public Health. 2012; 12:291.
292900001	0	1	0	0	1	1	1	1	0	0	0	1	0	0	AFRO	Uganda	0	1	0	2009.5	0	1	Interrupted time series with no controls	0	1	6. Unclear or not stated	1	540	1	in-service training + supervision + improved service utilization				Obua C, Kayiwa J, Waako P, Tomson G, Balidawa H, Chalker J, Ross-Degnan D, Wahlstrom R. Improving adherence to antiretroviral treatment in Uganda with a low-resource facility-based intervention. Global Health Action. 2014;7:24198.
293400001	0	1	0	1	1	0	1	0	0	0	0	0	0	0	AFRO	Senegal	0	1	0	2008	0	1	Interrupted time series with no controls	0	1	3. Urban-rural mix	1	990	1	peer education + in-service training + supervision + provision of medical products + fee per drug introduced + printed STG poster + unspecified community education				Thiam S, Thior M, Faye B, Ndiop M, Diouf ML, Diouf MB, Diallo I, Fall FB, Ndiaye JL, Albertini A, Lee E, Jorgensen P, Gaye O, Bell D. Major reduction in anti-malarial drug consumption in Senegal after nation-wide introduction of malaria rapid diagnostic tests. PLoS One. 2011; 6(4):e18419.
293500001	0	1	0	1	1	0	1	0	0	0	0	0	0	0	EURO	Serbia and Montenegro	1	0	0	2010.5	0	1	Interrupted time series with no controls	0	1	1. Urban +/- periurban	3	5910	1	in service training + printed literature for HCP				Vukovic M, Gvozdenovic BS, Rankovic M, McCormick BP, Vukovic DD, Gvozdenovic BD, Kastratovic DA, Markovic SZ, Ilic M, Jakovljevic MB. Can didactic continuing education improve clinical decision making and reduce cost of quality? Evidence from a case study. Journal of Continuing Education in the Health Professions. 2015; 35(2):109-18.
296100001	0	1	0	1	1	0	0	0	0	0	0	0	0	0	AMRO	Mexico	0	1	0	2002.5	0	1	Pre-post study with non-randomized controls	0	0	6. Unclear or not stated	3	6940	2	no intervention	in-service training + peer review + HCP group process			Reyes-Morales H, Pérez-Cuevas R, Hernandez SF, Sandoval PT, Mota MAO, Diaz Gonzales NJ, Pérez JAT, Larranaga FE, Gallardo HG. [Chapter 21: Effectiveness of an educational intervention based on a critical analysis of clinical practice for appropriate care in family medicine: a feasible and sustainable proposal for continuing medical education] In: Martínez-Salgado H, Villasís-Keever MA, Torres-Lóp…	Castro-Ríos A, Reyes-Morales H, Pérez-Cuevas R. [An evaluation of a continuing medical education program for primary care services in the prescription of hypoglycemic agents in diabetes mellitus type 2]. Salud Pública de México. 2008;50 Suppl 4:S445-52. Spanish.	Pérez-Cuevas R, Reyes H, Guiscafré H, Juárez-Díaz N, Oviedo M, Flores S, Muñoz O. The primary care clinic as a setting for continuing medical education: program description. Canadian Medical Association Journal. 2000; 14;163(10):1295-9.
296200001	0	1	0	1	0	0	0	0	0	0	0	0	0	1	WPRO	China	1	1	0	2001.5	0	1	Pre-post study with non-randomized controls	0	0	5. Rural only	3	1110	2	no intervention	in-service training + improved service utilization + facilities repair + provision of medical equipment + vouchers or in-kind health services			Chen WX, Li NX, He D, Ren XH. [An eight-year study on maternal and child health service utility in Sichuan province]. Zhonghua Liu Xing Bing Xue Za Zhi [Chinese Journal of Epidemiology]. 2009; 30(3):243-6. Chinese.	Chen WX, Li NX, He D, Ren XH. [An evaluation of the maternal and child health services in Qinba Health Project in Sichuan province]. Sichuan Da Xue Xue Bao Yi Xue Ban [Journal of Sichuan University Medicine Edition]. 2008;39(6):1007-10. Chinese.
296300001	0	0	0	0	0	0	0	0	0	0	0	0	1	0	WPRO	Philippines	0	0	1	2009	0	1	Pre-post study with non-randomized controls	0	0	3. Urban-rural mix	2	2260	2	no intervention	pre-service service training			Kim JM, Koh KW, Oak CH, Jung WH, Kim SH, Park DH. Assessment of village health worker training program in Tuguegarao, Philippine. Journal of Preventive Medicine Public Health. 2009;42(6):377-85.	Kim JM, Lee HY, Park DJ, Oak CH, Jeon MJ, Yu BC, Koh KW, Lee YH. Development of village health worker training program in Tuguegarao, Phillipines. Rural Medicine. 2008; 33(3):324-34.
296500001	0	1	0	2	1	0	1	0	0	0	0	0	0	0	WPRO	China	1	1	0	2008.5	1	1	Pre-post study with randomized controls	1	0	4. Town +/- rural	3	3690	2	training of managers	in-service training + training of managers + printed STG other job aid			Li L, Li Y, Long Y, Zhou Y, Lu J, Wu Y. [Experimental intervention study of safe injection in basic-level hospitals in Hunan by medical staff]. Zhong Nan Da Xue Xue Bao Yi Xue Ban [Journal of Central South University Medical Science]. 2013; 38(7):748-53. Chinese.
296600001	0	1	0	1	0	1	0	0	0	0	0	0	0	0	AFRO	United Republic of Tanzania	0	1	0	2011	0	1	Post-only study with randomized controls	1	0	1. Urban +/- periurban	1	730	3	no intervention	In-service training + supervision + printed STG other job aid	in-service training + supervision + electronic job aid + non-medical commodity supply+ printed STG other job aid		Rambaud-Althaus C, Shao A, Samaka J, Swai N, Perri S, Kahama-Maro J, Mitchell M, D'Acremont V, Genton B. Performance of health workers using an electronic algorithm for the management of childhood illness in Tanzania: a pilot implementation study. The American Journal of Tropical Medicine and Hygiene. 2017; 96(1):249-257.	Shao AF, Rambaud-Althaus C, Swai N, Kahama-Maro J, Genton B, D'Acremont V, Pfeiffer C. Can smartphones and tablets improve the management of childhood illness in Tanzania? A qualitative study from a primary health care worker's perspective. BMC Health Services Research. 2015; 15:135.
296700001	0	1	0	1	0	1	0	0	1	0	0	0	0	0	AFRO	United Republic of Tanzania	0	1	0	2010.5	0	1	Post-only study with randomized controls	1	0	3. Urban-rural mix	1	730	2	no intervention	in-service training + supervision + electronic job aid + non-medical commodity supply + printed STG other job aid			Shao AF, Rambaud-Althaus C, Samaka J, Faustine AF, Perri-Moore S, Swai N, Kahama-Maro J, Mitchell M, Genton B, D'Acremont V. New algorithm for managing childhood illness using mobile technology (ALMANACH): a controlled non-inferiority study on clinical outcome and antibiotic use in Tanzania. PLoS One. 2015;10(7):e0132316.
297600001	0	1	1	1	1	0	1	0	0	0	0	1	0	0	AMRO	Mexico	1	1	0	2002.5	0	1	Pre-post study with non-randomized controls	0	0	1. Urban +/- periurban	3	6940	2	no intervention	in-service training + supervision + integration of services + improved medicine access + improved service utilization + facilities repair + provision of medical equipment + HCP salary + user fee removed + community education group meetings + conditional c			Gertler, PJ. 2000. Final Report: The impact of PROGRESA on health. International Food Policy Research Institute. Washington, DC. Available at: http://www.ifpri.org/themes/progresa/pdf/Gertler_health.pdf, accessed Jan 16, 2009.	Behrman J, Hoddinott J. An evaluation of the impact of PROGRESA on pre-school child height. FCND DISCUSSION PAPER NO. 104. International Food Policy Research Institute. Washington, DC. March 2001. available at: http://www.ifpri.org/divs/fcnd/dp/papers/fcndp104.pdf, accessed 1/4/2008.	De la Torre R. Final version. In: External evaluation of the impact of the Oportunidades program. Cuernavaca, México: Instituto Nacional de Salud Pública, 2005. 68 p.	Coady DP, Filmer DP, Gwatkin DR. PROGRESA for progress: Mexico's Health, Nutrition, and Education Program. Development Outreach. World Bank. May 2005. Available at: http://www1.worldbank.org/devoutreach/may05/article.asp?id=296, accessed Oct 3, 2008	Hernández B, Hernández M, eds. External evaluation of the impact of the Oportunidades program 2004. Volume II, Health. Cuernavaca, México: Instituto Nacional de Salud Pública, 2005. 332 p.	Hernández B, Hernández M, eds. External evaluation of the impact of the Oportunidades program 2004 Volume III, Nutrition. Cuernavaca, México: Instituto Nacional de Salud Pública, 2005. 152 p.	Cruz C, de la Torre R, Velazquez C. [External evaluation of the impact of the Oportunidades program]. Evaluación externa de impacto del Programa Oportunidades 2001-2006, Cuernavaca, México: Instituto Nacional de Salud Pública, 2006. 92 p.	Stecklov G, Winter P, Todd J, Reglia F. Unintended effects of poverty programmes on childbearing in less developed countries: Experimental evidence from Latin America. Population Studies, 2007; 61(2): 125-140.	Rivera JA, Rodriguez G, Shamah T, Rosado JL, Casanueva E, Maulen I, Toussaint G, García-Aranda A. Implementation, monitoring, and evaluation of the nutrition component of the Mexican Social Programme (PROGRESA). Food and Nutrition Bulletin, 2000; 21(1): 35-42.	Parker SW, Teruel GM. Randomization and social program evaluation: The case of Progresa. The Annals of the American Academy of Political and Social Science. 2005; 599:199-217.
299490102	0	1	0	2	1	1	1	0	0	0	0	1	0	0	AFRO	Uganda	0	1	0	2015	0	0	Interrupted time series with no controls	0	1	4. Town +/- rural	1	670	1	in-service training + improvement collaborative + patient recording form				Westercamp N, Staedke S, Hutchinson E, Naiga S, Nabirye C, Taaka L, Maiteki C, Kigozi S, Okiring JM, Dorsey G, Rowe AK. Effectiveness and sustainability of a collaborative improvement method to increase the quality of routine malaria surveillance data in Kayunga District, Uganda. Proceedings of the 66th Annual Meeting of the American Society of Tropical Medicine and Hygiene; 2017 Nov 5-9; Baltimo…	Hutchinson E, Nayiga S, Nabirye C, Taaka L, Westercamp N, Rowe AK, Staedke SG. Opening the 'Black Box' of collaborative improvement: a qualitative evaluation of a pilot intervention to improve quality of surveillance data in public health centres in Uganda. 2017. 35 p.	Fatuma A. The Republic of Uganda, Kayunga District Local Government: 3-year district development plan, 2010/2011 - 2012/2013. 2010 Apr 28. 233 p.
300000001	0	0	1	2	1	0	0	1	0	0	0	0	1	0	SEARO	India	0	1	0	2012.5	0	1	Pre-post study with randomized controls	1	0	5. Rural only	2	1520	2	no intervention	in-service training + facilitated communication between HCPs + provision of medical products + franchising of HCPs			The WHP model. Washington DC: World Health Partners; 2014. 10 p. Available from: https://web.archive.org/web/20140211090501/http:/worldhealthpartners.org/Resources/report_26.pdf Accessed 10/26/2017.	Mohanan M, Giardili S, Das V, Rabin TL, Raj SS, Schwartz JI, Seth A, Goldhaber-Fiebert JD, Miller G, Vera-Hernandez M. Evaluation of a social franchising and telemedicine programme and the care provided for childhood diarrhoea and pneumonia, Bihar, India. Bulletin of the World Health Organization. 2017; 95(5):343-352E.	Mohanan M, Babiarz KS, Goldhaber-Fiebert JD, Miller G, Vera-Hernandez M. Effect of a large-scale social franchising and telemedicine program on childhood diarrhea and pneumonia outcomes in India. Health Affairs. 2016; 35(10):1800-1809.	Mohanan M, Vera-Hernández M, Das V, Giardili S, Goldhaber-Fiebert JD, Rabin TL, Raj SS, Schwartz JI, Seth A. The know-do gap in quality of health care for childhood diarrhea and pneumonia in rural India. JAMA Pediatrics. 2015; 169(4):349-57. doi: 10.1001/jamapediatrics.2014.3445.	Mohanan M, Goldhaber-Fiebert JD, Giardili S, Vera-Hernandez M. Providers' knowledge of diagnosis and treatment of tuberculosis using vignettes: evidence from rural Bihar, India. BMJ Global Health. 2016; 1(4):1-16.
301300001	0	0	1	0	0	0	0	0	0	0	0	1	1	0	AFRO	Uganda	0	0	1	2014	0	1	Pre-post study with non-randomized controls	0	0	5. Rural only	1	660	2	no intervention	in-service training + supervision + pre-packaging + provision of medical products + provision of medical equipment + structured stock ordering + reimbursement revised + HF award + printed patient recording form + printed STG other job aid + community educa			Kitutu FE. Effect of WHO/UNICEF iCCM innovation on drug shop pediatric fever management in South Western Uganda. Paper presented at: 64th Annual Meeting of American Society of Tropical Medicine and Hygiene; 2015 Oct 25-29; Philadelphia, PA.	Kitutu FE, Kalyango JN, Mayora C, Selling KE, Peterson S, Wamani H. Integrated community case management by drug sellers influences appropriate treatment of pediatric febrile illness in south western Uganda; a quasi-experimental study. Malaria Journal. 2017; 16(425).	Kitutu FE, Mayora C, Johansoon EW, Peterson S, Wamani H, Bidgeli M, Shroff ZC. Health system effects of implementing integrated community case management (iCCM) intervention in private retail drug shops in South Western Uganda: a qualitative study. BMJ Global Health. 2017; 2:(Suppl 3): e000334.
302100001	0	1	1	3	1	0	1	0	0	1	0	1	0	0	AFRO	Ghana	1	1	0	2014.5	0	1	Pre-post study with randomized controls	1	0	5. Rural only	2	1470	2	no intervention	in-service training + supervision + improved service utilization + printed patient recording form + patient education home visits + patient education printed materials			Okawa S, Hodgson A, Shibanuma A, Kikuchi K, Asare GQ, Ansah E, Gyapong M, Owusu-Agyei S, Oduro A, Yasuoka J, Nanishi K, Jimba M, Ghana EMBRACE Implementation Research Team. Impact of the EMBRACE intervention package on better uptake of maternal newborn health services in Ghana. Poster presented at: Fourth Global Symposium on Health Systems Research; 2016 Nov 14-18; Vancouver, BC.	Okawa S, Gyapong M, Leslie HH, Shibanuma A, Kikuchi K, Yeji F, Tawiah C, Addei S, Nanishi K, Oduro A, Owusu-Agei S, Ansah EK, Asare GQ, Yasuoka J, Hodgson A, Jimba M, Ghana EMBRACE Implementation Research Project Team. Effect of continuum-of-care intervention package on improving contacts and quality of maternal and newborn health care in Ghana: a cluster randomized controlled trial. Forthcoming.…	Kikuchi K, Ansah E, Okawa S, Shibanuma A, Gyapong M, Owusu-Agyei S, Oduro A, Quansah-Asare G, Hodgson A, Jimba M; Ghana EMBRACE Implementation Research Project. Ghana's Ensure Mothers and Babies Regular Access to Care (EMBRACE) program: study protocol for a cluster randomized controlled trial. Trials. 2015; 16:22.
309400001	0	1	1	2	1	0	1	0	0	0	0	1	0	0	AFRO	Uganda	1	1	0	2014.5	0	0	Pre-post study with randomized controls	1	0	3. Urban-rural mix	1	670	3	in-service training + provision of medical equipment	in-service training + non-supervisors help HCP (HCPs) + provision of medical equipment	in-service training + non-supervisors help HCP (HCPs and PPCs) + provision of medical equipment		Evans C. Integration of care for mothers and babies at birth to prevent and manage PPH and birth asphyxia: a facility based approach to improving care. Paper presented at: Global Maternal Newborn Health Conference; 2015 Oct 19; Mexico City, Mexico.	Evans C. Training frontline health workers in Uganda saving lives at birth: study plan Version 2. Baltimore (MD): Jhpiego; 2013 Dec. 29 p. IRB no.: 5383.
310900001	0	1	0	2	0	0	1	0	0	0	0	0	0	0	SEARO	India	0	1	0	2008	0	1	Pre-post study with randomized controls	1	0	1. Urban +/- periurban	2	1000	2	in-service training (in-person)	in-service training (tele-education)			Jain A, Agarwal R, Chawla D, Paul V, Deorari A. Tele-education vs classroom training of neonatal resuscitation: a randomized trial. Journal of Perinatology. 2010; 30(12):773-9.
312000001	0	1	0	3	1	0	0	0	0	0	0	0	0	0	AFRO + AMRO + SEARO	Argentina,Brazil,DRC,India,Philippines,Safrica,Tha	0	0	1	2009.5	0	1	Pre-post study with randomized controls	1	0	3. Urban-rural mix	7	4580	2	electronic HCP self-study	training + electronic self-study			Kulier R, Khan KS, Gulmezoglu AM, Carroli G, Cecatti JG, Germar MJ, Lumbiganon P, Mittal S, Pattinson R, Wolomby-Molondo JJ, Bergh AM, May W. A cluster randomized controlled trial to evaluate the effectiveness of the clinically integrated RHL evidence -based medicine course. Reproductive Health. 2010; 7:8.	Kulier R, Gülmezoglu AM, Zamora J, Plana MN, Carroli G, Cecatti JG, Germar MJ, Pisake L, Mittal S, Pattinson R, Wolomby-Molondo JJ, Bergh AM, May W, Souza JP, Koppenhoefer S, Khan KS. Effectiveness of a clinically integrated e-learning course in evidence-based medicine for reproductive health training: a randomized trial. JAMA. 2012; 308(21):2218-25.
312200001	0	1	0	0	0	0	0	0	0	0	0	1	1	0	SEARO	India	0	1	0	2007.5	0	1	Pre-post study with non-randomized controls	0	0	6. Unclear or not stated	2	1000	2	in-service training (8-days)	in-service training (5-days)			Kumar D, Aggarwal AK, Kumar R. The effect of interrupted 5-day training on integrated management of neonatal and childhood illness on the knowledge and skills of primary health care workers. Health Policy and Planning. 2009; 24(2):94-100.	Venkatachalam J, Kumar D, Gupta M, Aggarwal AK. Knowledge and skills of primary health care workers trained on integrated management of neonatal and childhood illness: follow-up assessment 3 years after the training. Indian Journal of Public Health. 2011; 55(4):298-302.
313400001	0	1	0	3	0	0	0	0	0	0	1	0	0	0	WPRO	China	0	0	1	2009.5	0	1	Post-only study with randomized controls	1	0	1. Urban +/- periurban	3	4340	2	pre-service training (individual feedback)	pre-service training (group feedback)			Li Q, Ma EL, Liu J, Fang LQ, Xia T. Pre-training evaluation and feedback improve medical students' skills in basic life support. Medical Teacher. 2011;33(10):e549-55.
318200001	0	0	0	1	0	0	0	0	0	0	0	0	0	1	AFRO	Burkina Faso	0	1	0	2014.5	0	0	Pre-post study with non-randomized controls	0	0	6. Unclear or not stated	1	620	2	printed STG literature	peer education + in-service training + printed STG literature			Badolo O, Nebie S, Bonkoungou M, Dodo M, Ouedraogo T, Waxman R, Brieger WR. Improving provision of malaria services through provider training in Burkina Faso: improving malaria care project (IMC). Paper presented at: The 64th Annual Meeting of the American Society of Tropical Medicine & Hygiene. 25-29 Oct 2015; Philadelphia, PA.	Badolo O, Nébié S, Dodo M, Ouedraogo T, Waxman R, Brieger W. Intermittent preventive treatment in pregnancy: increasing the doses in Burkina Faso. Paper presented at: The 64th Annual Meeting of the American Society of Tropical Medicine & Hygiene. 25-29 Oct 2015; Philadelphia, PA.
318400001	0	1	1	2	0	0	1	0	0	1	0	0	0	0	AFRO	South Africa	0	1	0	2007.5	0	1	Pre-post study with randomized controls	1	0	3. Urban-rural mix	3	6010	3	printed STG literature	in-service training (distance learning) + supervision (via telephone)	in-service training (in-person) + supervision (in-person)		Rawson RA, Rataemane S, Rataemane L, Ntlhe N, Fox RS, McCuller J, Brecht ML. Dissemination and implementation of cognitive behavioral therapy for stimulant dependence: a randomized trial comparison of 3 approaches. Substance Abuse. 2013; 34(2):108-17.
319300001	0	1	1	1	1	0	0	0	0	0	0	0	0	0	EMRO	Iran (Islamic Republic of)	0	1	0	2010	0	1	Pre-post study with non-randomized controls	0	0	1. Urban +/- periurban	3	6140	4	in-service training (not HCP tailored large group) + bulletin for HCP + printed STG literature	in-service training (not HCP tailored small group) + bulletin for HCP + printed STG literature	in-service training (HCP tailored large group) + bulletin for HCP + printed STG literature	in-service training (HCP tailored small group) + bulletin for HCP + printed STG literature	Shirazi M, Lonka K, Parikh SV, Ristner G, Alaeddini F, Sadeghi M, Wahlstrom R. A tailored educational intervention improves doctor's performance in managing depression: a randomized controlled trial. Journal of Evaluation in Clinical Practice. 2013; 19(1):16-24.
319600001	0	1	0	1	0	0	0	0	1	0	0	0	0	0	WPRO	China	0	1	0	2011	0	1	Pre-post study with non-randomized controls	0	0	1. Urban +/- periurban	3	5060	2	in-service training (trainer = paramedics)	in-service training (trainer = doctors)			Tu J, Cai W, Zhang M, Yang X, Chen H, Zhou S, Chen X, Zhao Y, Guo J, Yang Y. Effect of the China-America Union Pre-Hospital Emergency Care Training Program on the emergency knowledge and skills of Chinese paramedics. Saudi Medical Journal. 2013; 34(2):177-80.
319900001	0	1	1	3	1	1	1	0	0	0	0	0	1	0	AFRO	Uganda	0	1	0	2013.5	0	1	Post-only study with randomized controls	1	0	1. Urban +/- periurban	1	660	2	in-service training (clinical acumen) + supervision + integration of services (by nurses and medical/clinical officers) + printed patient recording form + printed poster for HCP + other printed job aid	in-service training (protocolized model) + supervision + integration of services (by nurses only) + printed patient recording form + printed poster for HCP + other printed job aid			Wagner GJ, Ngo V, Goutam P, Glick P, Musisi S, Akena D. A structured protocol model of depression care versus clinical acumen: a cluster randomized trial of the effects on depression screening, diagnostic evaluation, and treatment uptake in Ugandan HIV clinics. PLoS One. 2016; 11(5):e0153132	Wagner GJ, Ngo V, Glick P, Obuku EA, Musisi S, Akena D. INtegration of DEPression Treatment into HIV Care in Uganda (INDEPTH-Uganda): study protocol for a randomized controlled trial. Trials. 2014; 15:248	Wagner GJ, Ghosh-Dastidar B, Ngo V, Robinson E, Musisi S, Glick P, Dickens A. A cluster randomized controlled trial of two task-shifting depression care models on depression alleviation and antidepressant response among HIV clients in Uganda. Research and Advances in Psychiatry. 2016; 3(1):12-21.	Odokonyero R, Wagner G, Ngo V, Nakasujja N, Musisi S, Akena D. Giving ‘Sadness’ a name: the need for integrating depression treatment into HIV care in Uganda. Journal of the International Association of Providers of AIDS Care. 2015; 14(2):108-11.

## Sheet: full reference list
PubID	Report
1	Angunawela II, Diwan VK, Tomson G. Experimental evaluation of the effects of drug information on antibiotic prescribing: a study in outpatient care in an area of Sri Lanka. International Journal of Epidemiology. 1991; 20(2):558-564.
5	Santoso B, Suryawati S, Prawaitasari JE. Small group intervention vs. formal seminar for improving appropriate use. Social Science and Medicine, 1996; 42(8):1163-1168.
6	Perez-Cuevas R, Guiscafre H, Munoz O, Reyes H, Tome P, Libreros V, Gutierrez G. Improving physician prescribing patterns to treat rhinopharyngitis. Intervention strategies in two health systems of Mexico. Social Science and Medicine. 1996; 42(8): 1185-1194.
10	Bexell A, Lwando E, von Hofsten B, Tembo S, Eriksson B, Diwan VK. Improving drug use through continuing education: a randomized controlled trial in Zambia. J Clin Epidemiol, 1996; 49(3): 355-357.
13	Brown LD, De Negri B, Hernandez O, Dominguez L, Sanchack JH, Roter D. An evaluation of the impact of training Honduran health care providers in interpersonal communication. International Journal for Quality in Health Care, 2000; 12(6): 495-501.
19	Fairall LR, Zwarenstein M, Bateman ED et al. Effect of educational outreach to nurses on tuberculosis case detection and primary care of respiratory illness: pragmatic cluster randomized controlled trial. BMJ, 2005; 331:750-754.
20	Agyepong IA, Ansah E, Gyapong M, Adjei S, Barnish G, Evans D. Strategies to improve adherence to recommended chloroquine treatment regimes: a quasi-experiment in the context of integrated primary health care delivery in Ghana. Social Science and Medicine, 2002; 55:2215-2226.
34	Chowdhury AKA, Khan OF, Matin MA, Begum K, Galib MA. Study of effect of standard treatment guidelines with or without audit on prescribing for diarrhoea and acute respiratory infection in some government health facilities in Bangladesh. Unpublished manuscript.
35	Chowdhury AKA, Khan MOF, Matin A, Haque Z. Impact of standard treatment guidelines and small group training on prescribing for diarrhoea in under-five children in Bangladesh. INRUD News, 1995;5(2):20.
42	Flores R, Robles J, Burkhalter BR. Distance education with tutoring improves diarrhea case management in Guatemala. International Journal for Quality in Health Care, 2002; 14(supplement 1): 47-56.
45	Gonzalez Ochoa E, Armas Perez L, Bravo Gonzalez JR, Cabrales Escobar J, Rosales Corrales R, Abreu Suarez G. Prescription of antibiotics for mild acute respiratory infections in children. Bulletin of the Pan American Health Organization, 1996; 30(2): 106-117.
46	Guiscafre H, Martínez H, Reyes H, Pérez-Cuevas R, Castro R, Muñoz O, Gutiérrez G. From research to public health interventions. I. Impact of an educational strategy for physicians to improve treatment practices of common diseases. Archives of Medical Research. 1995;26 Spec No:S31-9.
47	Guiscafré H, Muñoz O, Padilla G, Reyes RM, González E, Bronfman M, Gutiérrez G. [Strategies for improving the therapeutic patterns used in acute diarrhea in primary medical care units. VI. Evaluation of the strategy aimed at family physicians for increasing the use of oral rehydration and decreasing that of antibiotics and restrictive diets]. Archivos de investigación médica. 1988;19(4):395-407. …
48	Gutierrez G, Guiscafre H, Bronfman M, Walsh J, Martinez H, Munoz O. Changing physician prescribing patterns: Evaluation of an educational strategy for acute diarrhea in Mexico City. Medical Care, 1994; 32(5):436-446.
51	Harrison A, Karim SA, Floyd K, Lombard C, Lurie M, Ntuly N, Wilkinson D. Syndrome packets and health worker training improve sexually transmitted disease case management in rural South Africa: randomized controlled trial. AIDS, 2000; 14(17):2769-2779.
59	Kafle KK, Shrestha AD, Karkee SB, Yadav BP, Prasad RR, Shrestha N, Das PL, Pradhan YMS, Jha TN, Jha SS, Bhatta BR. Intervention test of training and supervision on dispensing practices. Report submitted to USAID/RPM/JSI Nepal. Kathmandu, Nepal. August 1995.
61	Kafle KK, Shrestha AD, Karkee SB, Das PL, Shrestha N, Prasad RR, Pradhan YMS, Quick JD, Ross-Degnan D, Shrestha BR, Baniya R, Adhikary R, Singh KK, Bhandari R, Lamichhane R, Lamichhane A, Upadhyaya S. Impact of action-oriented training and/or mailed print material on retailer practices: safe dispensing, correct advice, and appropriate referral for diarrhoea, ARI, and pregnancy. Unpublished report…
63	Kafuko JM, Zirabamuzaale C, Bagenda D. Rational drug use in rural health units of Uganda: effect of national standard treatment guidelines on rational drug use. International Conferences on Improving Use of Medicines, Chiang Mai, Thailand, 1997. (accessed on July 20, 2006: http://mednet3.who.int/icium/icium1997/posters/2f3_text.html)
91	O'Rourke, K. The effect of hospital staff training on management of obstetrical patients referred by traditional birth attendants. International Journal of Gynecology & Obstetrics, 1995;48(Suppl):S95-S102.
96	Podhipak A, Varavithya W, Punyaratabandhu P, Vathanophas K, Sangchai R. Impact of an educational program on the treatment practices of diarrheal diseases among pharmacists and drugsellers. Southeast Asian Journal of Tropical Medicine and Public Health, 1993;24(1):32-39.
101	Ross Degnan D, Soumerai SB, Goel PK, Bates J, Makhulo J, Dondi N, Sutoto, Adi D, Ferraz-Tabor L, Hogan R. The impact of face-to-face educational outreach on diarrhea treatment in pharmacies. Health Policy and Planning, 1996; 11(3):308-318.
102	Roter D, Rosenbaum J, de Negri B, Renaud D, DiPrete-Brown L, Hernandez O. The effects of a continuing medical education programme in interpersonal communication skills on doctor practice and patient satisfaction in Trinidad and Tobago. Medical Education, 1998; 32:181-189.
103	Ruangkanchanasetr, S. Laboratory investigation utilization in pediatric out-patient department Ramathibodi Hospital. J Med Assoc Thai, 1993; 76(Suppl 2): 194-208.
120	Widyastuti S, Dwiprahasto I, Andajaningsih, Bakri Z. The impact of problem-based rational drug use training on prescribing practices, cost reallocations and savings in primary care facilities. Poster presented at International Conferences on Improving Use of Medicines (ICIUM), Chiang Mai, Thailand, 1997. Available on the web at: http://mednet3.who.int/icium/icium1997/posters/2b4_text.html, access…
126	Flores R, Robles J, Burkhalter BR. Implementation and Evaluation of a Distance Education Course on the Management of Cholera and Diarrheal Diseases. Published for INCAP, PAHO/WHO, and USAID by the BASICS Project, Arlington, VA, 1998. Available online: http://www.basics.org/publications/pubs/implementation/contents.htm
134	Bailey PE, Szaszdi JA, Glover L. Obstetric complications: does training traditional birth attendants make a difference? Pan American Journal of Public Health, 2002;11(1):15-23.
135	Bhandari N, Mazumder S, Bahl R, Martines J, Black RE, Bhan MK, and the Infant feeding study group. An Educational Intervention to Promote Appropriate Complementary Feeding Practices and Physical Growth in Infants and Young Children in Rural Haryana, India. Journal of Nutrition, 2004; 134: 2342-2348.
161	Mohagheghi MA, Mosavi-Jarrahi A, Khatemi-Moghaddam M, Afhami A, Khodi S, Azemoodeh O. Community-based outpatient practice of antibiotics use in Tehran. Pharmacoepidemiology and Drug Safety, 2005; 14: 135-38.
166	Penny ME, Creed-Kanashira HM, Robert RC, Narro MR, Caulfield LE, Black RE. Effectiveness of an educational intervention delivered through the health services to improve nutrition in young children: a cluster-randomised controlled trial. The Lancet, 2005; 365: 1863-1872.
173	Winch PJ, Bagayoko A, Diawara A, Kané M, Thiéro F, Gilroy K, Daou Z, Berthé Z, Swedberg E. Increases in correct administration of chloroquine in the home and referral of sick children to health facilities through a community-based intervention in Bougouni District, Mali. Transactions of the Royal Society of Tropical Medicine & Hygiene, 2003;97(5):481-490.
219	Bronfman M, Castro R, Castro V, Guiscafré H, Muñoz O, Gutiérrez G. [Medical prescription and treatment compliance in acute infectious diarrhea: indirect impact of an educational intervention]. Salud pública de México. 1991 Nov-Dec;33(6):568-75. [Article in Spanish]
276	Gilroy K, Winch PJ, Diawara A, Swedburg E, Thiéro F, Kané M, Daou Z, Berthé Z, Bagayoko A. Impact of IMCI training and language used by provider on quality of counseling provided to parents of sick children in Bougouni District, Mali. Patient Education and Counseling, 2004;54:35-44.
286	Baral JP, Bhattarai S, Thapa MR, Ghimire K, Burathoki K. Effectiveness of training of basic health workers in leprosy control programme. Indian Journal of Leprosy, 1998; 70(supplement): 23S-31S.
287	Bawa SB, Olumide EAA. The effect of training on the reporting of notifiable diseases among health workers in Yobe State, Nigeria. The Nigerian Postgraduate Medical Journal, 2005; 12(1):1-5.
336	Arreola-Risa C, Mock C, Herrera-Escamilla AJ, Contreras I, Vargas J. Cost-effectiveness and benefit of alternatives to improve training for prehospital trauma care in Mexico. Prehospital and Disaster Medicine, 2004;19(4):318-325.
337	Arreola-Risa C, Mock CN, Lojero-Wheatly L, de la Cruz O, Garcia C, Canavati-Ayub F, Jurkovich GJ. Low-cost Improvements in Prehospital Trauma Care in a Latin American City. The Journal of Trauma: Injury, Infection, and Critical Care, 2000; 48(1): 119-124.
346	Bhandari N, Mazumder S, Bahl R, Martines J, Black RE, Khan MK, and other members of the Infant Feeding Study Group. Use of multiple opportunities for improving feeding practices in under-twos within child health programmes. Health Policy and Planning, 2005;20(5):328-36.
350	Carrier J. Educational outreach visits to primary care nurses improved tuberculosis detection and treatment of obstructive lung disease. Evidence Based Nursing, 2006;9(2):58.
355	Waters HR, Penny ME, Creed-Kanashiro HM, Robert RC, Narro R, Willis J, Caulfield LE, Black RE. The cost-effectiveness of a child nutrition education programme in Peru. Health Policy Plan. 2006;21(4):257-264.
356	Bhandari N, Bahl R, Mazumdar S, Martines J, Black RE, Bhan MK, and the other members of the Infant Feeding Study Group. Effect of community-based promotion of exclusive breastfeeding on diarrhoeal illness and growth: a cluster randomised controlled trial. Lancet, 2003;361(9367):1418-23.
364	Dusitsin N, Varakamin S, Ningsanon P, Chalapati S, Boonsiri B, Gray RH. Post-partum tubal ligation by nurse-midwives and doctors in Thailand. Lancet, 1980;1(8169):638-639.
382	Stecklov G, Winter P, Todd J, Reglia F. Unintended effects of poverty programmes on childbearing in less developed countries: Experimental evidence from Latin America. Population Studies, 2007; 61(2): 125-140.
393	Huang J, Jiang D, Wang X, Liu Y, Fennie K, Burgess J, Williams AB. Changing knowledge , behavior, and practice related to universal precautions among hospital nurses in China. The Journal of Continuing Education in Nursing, 2002; 33(5):217-224.
466	Oz F. Impact of training on empathetic communication skills and tendency of nurses. Clinical Excellence for Nurse Practitioners, 2001; 5(1): 44-51.
476	Ratanajamit C, Chongsuvivatwong V, Geater AF. A randomized controlled educational intervention on emergency contraception among drugstore personnel in southern Thailand. J Am Med Womens Assoc. 2002; 57(4): 196-9, 207.
484	Sathar Z, Jain A, Ramarao S, ul Haque M, Kim J. Introducing client-centered reproductive health services in a Pakistani setting. Studies in Family Planning. 2005; 36(3): 221-234.
496	Singhal N, McMillan DD, Cristobal FL, Arciaga RS, Hocson W, Franco J, Farrales R, Famor L. Problem-based teaching of birth attendants in the Philippines. Health Care for Women International, 2001;22:569-583.
524	O’Rourke K. Evaluación de un programa de capacitación de parteras tradicionales en Quetzaltenango, Guatemala. Boletín de la Oficina Sanitaria Panamericana, 1995; 119 (6): 503 - 514.
544	Vidal SA, Ronfani L, da Mota Silveira S, Mello MJ, dos Santos ER, Buzzetti R, Cattaneo A. Comparison of two training strategies for essential newborn care in Brazil. Bulletin of the World Health Organization, 2001;79(11):1024-31.
569	Gertler, PJ. 2000. Final Report: The impact of PROGRESA on health. International Food Policy Research Institute. Washington, DC. Available at: http://www.ifpri.org/themes/progresa/pdf/Gertler_health.pdf, accessed Jan 16, 2009.
570	Behrman J, Hoddinott J. An evaluation of the impact of PROGRESA on pre-school child height. FCND DISCUSSION PAPER NO. 104. International Food Policy Research Institute. Washington, DC. March 2001. available at: http://www.ifpri.org/divs/fcnd/dp/papers/fcndp104.pdf, accessed 1/4/2008.
571	Rawlings LB, Rubio GM. Evaluating the Impact of Conditional Cash Transfer Programs: Lessons from Latin America. 2003. World Bank, Policy Research Working Paper Series, number 3119. available at: http://www-wds.worldbank.org/external/default/WDSContentServer/IW3P/IB/2003/09/30/000094946_0309160409264/Rendered/PDF/multi0page.pdf, accessed Jan 19, 2010.
598	Denis MB. Improving compliance with quinine + tetracycline for treatment of malaria: evaluation of health education interventions in Cambodian villages. Bulletin of the World Health Organization. 1998; 76(Suppl. 1): 43-49.
601	Marsh VM, Mutemi WM, Willetts A, Bayah K, Were S, Ross A, Marsh K. Improving malaria home treatment by training drug retailers in rural Kenya. Tropical Medicine and International Health. 2004; 9(4): 451-460.
605	Tumwikirize WA, Ekwaru PJ, Mohammed K, Ogwal-Okeng JW, Aupont O. Impact of a face-to-face educational intervention on improving the management of acute respiratory infections in private pharmacies and drug shops in Uganda. East African Medical Journal. 2004; 81(2 Suppl): S25-S32.
617	Kwast BE, Koblinsky MA. Starting maternity care programmes in developing countries to reduce maternal mortality. Contemporary Reviews in Obstetrics & Gynaecology, 1995;7(4):220-225.
621	Pagaiya N, Garner P. Primary care nurses using guidelines in Thailand: a randomized controlled trial. Tropical Medicine and International Health, 2005;10(5):471-477.
630	Obua C, Ogwal-Okeng JW, Waako P, Aupont O, Ross-Degnan D. Impact of an educational intervention to improve prescribing by private physicians in Uganda. East African Medical Journal. 2004 Feb;Suppl: S17-S24.
631	Faxelid E, Ahlberg M, Freudenthal S, Ndulo J, Krantz I. Quality of STD care in Zambia. Impact of training in STD management. International Journal for Quality in Health Care. 1997; 9(5): 361-366
671	Rea MF, Venancio SI, Martines JC, Savage F. Counselling on breastfeeding: assessing knowledge and skills. Bulletin of the World Health Organization, 1999; 77(6): 492-498.
672	Meyer JC, Summers RS, Moller H. Randomized, controlled trial of prescribing training in a South African province. Medical Education, 2001(9); 35: 833-840.
683	Costello M, Lacuesta M, RamaRao S, Jain A. A client-centered approach to family planning: the Davao Project. Studies in Family Planning. 2001; 32(4):302-14.
688	Mukti AG, Treloar C, Suprawimbarti, Asdie AH, D'Este K, Higginbotham N, Heller R. A universal precautions education intervention for health workers in Sardjito and Pku Hospital, Indonesia. Southeast Asia Journal of Tropical Medicine and Public Health. 2000; 31(2): 405-411.
689	Lueveswanij S, Nittayananta W, Robison VA. Changing knowledge, attitudes, and practices of Thai oral health personnel with regard to AIDS: an evaluation of an educational intervention. Community Dental Health. 2000; 17:165-171.
692	Johnson KW, Young LC, Suresh G, Berbaum ML. Drug abuse treatment training in Peru. A social policy experiment. Evaluation Review. 2002; 26(5): 480-519
770	Loevinsohn BP, Gareaballah E. Missed opportunities for immunization during visits for curative care: a randomized cross-over trial in Sudan. Bulletin of the World Health Organization. 1992; 70(3): 335-339.
966	Gadomski AM, Khallaf N, El Ansary S, Black RE. Assessment of respiratory rate and chest indrawing in children with ARI by primary care physicians in Egypt. Bulletin of the World Health Organization. 1993; 71(5): 523-527.
999	Garcia PJ, Gotuzzo E, Hughes JP, Holmes KK. Syndromic management of STDs in pharmacies: evaluation and randomised intervention trial. Sexually Transmitted Infections. 1998;74 Suppl 1:S153-8.
1003	Huntington D, Apologan A. The integration of family planning and childhood immunization services in Togo. Studies in Family Planning, 1994; 25(3): 176-183.
1034	Wang Y, Wang L, Xu Y, Wang S, Wang J, Jiang P, Li F, Shi H, Wang H, Zhang J, Chen L, Liu J, Wang Q. Study on intervention and comparison of rational use of antibiotics on perioperative period of clean incision and clean-defiled incision. Zhonghua Liu Xing Bing Xue Za Zhi, 2002;23(4):301-3.
1042	Stanback J, Griffey S, Lynam P, Ruto C, Cummings S. Improving adherence to family planning guidelines in Kenya: an experiment. International Journal for Quality in Health Care, 2007;19(2):68-73.
1048	Althabe F, Buekens P, Bergel E, Belizán JM, Campbell MK, Moss N, Hartwell T, Wright LL, for the Guidelines Trial Group. A behavioral intervention to improve obstetrical care. New England Journal of Medicine, 2008;358(18):1929-40.
1081	Wang H, Fennie K, He G, Burgess J, Williams AB. A training programme for prevention of occupational exposure to bloodborne pathogens: impact on knowledge, behaviour and incidence of needle stick injuries among student nurses in Changsha, People's Republic of China. Journal of Advanced Nursing, 2003; 41(2): 187-194.
1098	Goodman CA, Mutemi WM, Baya EK, Willetts A, Marsh V. The cost-effectiveness of improving malaria home management: shopkeeper training in rural Kenya. Health Policy and Planning. 2006; 21(4): 275-288.
1104	Chalker J, Chuc NTK, Falkenberg T, Tomson G. Private pharmacies in Hanoi, Vietnam: a randomized trial of a 2-year multi-component intervention on knowledge and stated practice regarding ARI, STD and antibiotic/steroid requests. Tropical Medicine and International Health. 2002; 7(9):803-810.
1106	Adams EJ, Garcia PJ, Garnett GP, Edmunds WJ, Holmes KK.The cost-effectiveness of syndromic management in pharmacies in Lima, Peru. Sexually Transmitted Diseases. 2003 May; 30(5): 379-387
1107	Garcia P, Hughes J, Carcamo C, Holmes KK. Training pharmacy workers in recognition, management, and prevention of STDs: district-randomized controlled trial. Bulletin of the World Health Organization. 2003;81(11):806-814
1110	Larsson M. Antibiotic use and resistance: Assessing and improving utilisation and provision of antibiotics and other drugs in Vietnam. Doctor´s Thesis from Karolinska Institutet, December 17, 2003, ISBN: 91-7349-630-8. available at:http://diss.kib.ki.se/2003/91-7349-630-8/thesis.pdf. accessed June 10, 2008
1111	Chuc NTK, Larson M, Do NT, Diwan VK, Tomson GB, Falkenberg T. Improving private pharmacy practice: a multi-intervention experiment in Hanoi, Vietnam. Journal of Clinical Epidemiology, 2002; 55(11):1148-1155.
1123	de Negri B, DiPrete Brown L, Hernandez O, Rosenbaum J, Roter D. Improving interpersonal communication between health care providers and clients. Quality Assurance Methodology Refinement Series. Bethesda, MD: Quality Assurance Project. Part 2: Case studies; p. 27-F-33.
1132	De la Torre R. Final version. In: External evaluation of the impact of the Oportunidades program. Cuernavaca, México: Instituto Nacional de Salud Pública, 2005. 68 p.
1133	Lacayo C. Red de Protección Social: Nicaragua. Inter-regional Inequality Facility Policy Brief No. 3, February 2006.
1142	Luoma M, Jaskiewicz W, McCaffery J, Catotti DN. Dominican Republic performance improvement project evaluation. Chapel Hill, North Carolina: INTRAH. January, 2000. 124p. Basic funding provided by the United States Agency for International Development. Contract No.: CCP-C-00-95-0005-00
1145	Huntington D, Hassan EO, Attallah N, Toubia N, Naguib M, Nawar L. Improving the medical care and counseling of postabortion patients in Egypt. Studies in Family Planning. 1995; 26(6): 350-362.
1150	Jacobs E, Brambila C, Vernon R. Reproductive health care in the postnatal period in Guatemala. Population Council. August 5, 2002.
1151	León FR, Brambila C, de la Cruz M, Bratt J, García Colindres J, Vásquez B, Morales C. Testing balanced counseling to improve provider-client interaction in Guatemala’s MOH clinics. Population Council, Washington, DC. 2003 October. 36p. Basic funding provided by the US Agency for International Development. FRONTIERS Cooperative Agreement No.: HRN-A-00-98-00012-00. Project No.: 5801 13052.
1152	León FR, Brambila C, de la Cruz M, Bratt J, Gutiérrez G, Dávila V, Bonatto C, Ríos A. Effects of IGSS’ Job Aids-Assisted Balanced Counseling Algorithms on quality of care and client outcomes. 2003[cited 2012 Feb 13]. 64p.The study was funded by the U.S. Agency for International Development under the terms of Cooperative Agreement No.: HRN-A-00-98-00012-00 and In-house Project No.: 8002 13052. Ava…
1166	Quality Assurance Project. Evaluation of an IMCI computer-based training course in Kenya. Operations Research Results. Published for the U.S. Agency for International Development (USAID) by the Quality Assurance Project (QAP), Bethesda, MD. 2006.
1167	Tavrow P, Kekitiinwa Rukyalekere A, Maganda A, Ndeezi G, Sebina-Zziwa A, Knebel E. A comparison of computer-based and standard training in the Integrated Management of Childhood Illness in Uganda. Operations Research Results, 2002; 2(5). Bethesda, MD: Published for the U.S. Agency for International Development (USAID) by the Quality Assurance (QA) Project.
1186	Nawar L, Kharboush I (Frontiers in Reproductive Health Program), Ibrahim MA, Makhlouf (Cairo Demographic Center), Adamchak S (Frontiers in Reproductive Health Program Family Health International). Impact of improved client-provider interaction on women's achievement of fertility goals in Egypt. US Agency for International Development. December 2004 [cited 28 February, 2011]. 45p. Cooperative Agre…
1190	Osei I, Garshong B, Banahene GO, Gyapong J, Tapsoba P, Askew I, Ahiadeke C, Killian R, Bonku E, Combary P, Sampson W. Improving the Ghanaian Safe Motherhood Programme. Evaluating the effectiveness of alternative training models and other performance improvement factors on the quality of maternal care and client outcomes. Health Research Unit, Ghana Health Services, Frontiers Program, Population C…
1191	Padilla MB, Fort A. Results of the second follow-up study of the Dominican Republic performance improvement project evaluation. Chapel Hill, North Carolina: Intrah, PRIME II Project. November, 2001. 35p. Basic funding provided by the Center for Population, Health and Nutrition, Global Bureau, United States Agency for International Development. Technical Report No.:28. Grant No.: HRN-A-00-99-00022…
1222	Catotti DN. Improving the quality and availability of reproductive health services: humanized care in the Dominican Social Security Institute: a prime performance improvement project. PRIME Fact Sheet. Chapel Hill, North Carolina: intrah. 1- 4.
1227	de Negri B, DiPrete Brown L, Hernandez O, Rosenbaum J, Roter D. Improving interpersonal communication between health care providers and clients. Quality Assurance Methodology Refinement Series. Bethesda, MD: Quality Assurance Project. Part 1: A conceptual framework for interpersonal communication; p. 5-26.
1240	Stanback J, Griffey Brechin SJ, Lynam P, Toroitich-Ruto C, Smith T, and the Kenya Guidelines Update Evaluation Study Group. Final Report: The Effectiveness of National Dissemination of Updated Reproductive Health / Family Planning Guidelines in Kenya. August 2001.
1265	Personal communication from Shams El Arifeen, International Centre for Diarrhoeal Diseases Research, Bangladesh (sarifeen@siriusbb.com; shams@icddrb.org) to Samantha Rowe, Centers for Disease Control and Prevention (say9@cdc.gov) on June 13, 2007, which contained a draft manuscript and supplementary tables of Bangladesh MCE Health Facility Survey Indicators.
1266	El Arifeen S. Section 4: Health Facility Survey. 2000; xxv-xxxiv.
1267	Arifeen SE, Bryce J, Gouws E, Baqui AH, Black RE, Hoque DME, Chowdhury EK, Yunus M, Begum N, Akter T, Siddique A. Quality of care for under-fives in first-level health facilities in one district of Bangladesh. Bulletin of the World Health Organization, 2005; 83: 260-267.
1268	El Arifeen S, Blum LS, Hoque DM, Chowdhury EK, Khan R, Black RE, Victora CG, Bryce J. Integrated Management of Childhood Illness (IMCI) in Bangladesh: early findings from a cluster-randomised study. Lancet 2004; 364: 1595-1602.
1318	Mwinga K, Siziya S, Kasungami D, Kalesha P, Tambatamba B. Research Study Report: Comparative study of Integrated Management of Childhood Illness (IMCI) case management skills of primary health care workers trained in eleven-day standard course and six-day abridged course for physicians. Zambian Ministry of Health. 2006.
1326	Kafle K, Karkee SB, Prasad RR, Bhuju GB, Shrestha N, Das PL, Shrestha AD. Evaluation of a successful intervention for sustainability and effects in post research phase. Kathmandu University Medical Journal, 2006; 4(1): 61-64.
1327	Kafle KK, Shrestha AD, Shrestha N, Prasad RR, Das PL, Bhuju GB. Test of Strategies for Implementing STS in Improving Use of Drugs. INRUD, Nepal; New Baneswore, Kathmandu, Nepal; March, 2001
1330	Kafle KK, Shrestha N, Karkee SB, Prasad RR, Bhuju GB, Das PL. Intervention studies on rational use of drugs in public and private sector in Nepal. Nepal Medical College Journal, 2005; 7(1): 47-50.
1332	Akici A, Kalaca S, Ugurlu MU, Karaalp A, Cali S, Oktay S. Impact of a short postgraduate course in rational pharmacotherapy for general practitioners. British Journal of Clinical Pharmacology, 2004;57(3): 310-321
1333	Eltayeb IB, Awad AI, Mohamed-Salih MS, Daffa-Alla MA, Ahmed MB, Ogail MA, Matowe L. Changing the prescribing patterns of sexually transmitted infections in the White Nile Region of Sudan. Sexually Transmitted Infections, 2005; 81(5):426-427.
1334	Shrestha N, Samir KC, Baltussen R, Kafle KK, Bishai D, Niessen L. Practical approach to lung health in Nepal: better prescribing and reduction of cost. Tropical Medicine and International Health, 2006;11(5):765-772.
1344	Chaudhury RR, Parameswar R, Gupta U, Sharma S, Tekur U, Bapna JS. Quality medicines for the poor: experience of the Delhi programme on rational use of drugs. Health Policy and Planning, 2005 Mar; 20(2):124-36.
1345	Kotwani A, Gupta U, Suri JC, Chaudhury RR. Impact of educational intervention on prescribing behavior and cost of therapy in bronchial asthma in colony hospitals of Delhi. Poster presentation at 2nd ICIUM conference, Chiang Mai, Thailand, Mar 30-Apr 2, 2004. author email: anitakotwani@msn.com, available at: http://archives.who.int/icium/icium2004/resources/ppt/AD035.ppt, accessed Sept 11, 2008
1348	Sharma S, Gupta U, Chaudhury RR, Bapna JS. Prescribing behaviour of physicians. Journal of Health Management, 2002; 4(1): 55-71.
1349	Awad AI, Eltayeb IB, Baraka OZ. Changing antibiotics prescribing practices in health centers of Khartoum State, Sudan. European Journal of Clinical Pharmacology, 2006; 62(2):135-142.
1350	Teng CL, Achike FI, Phua KL, Nurjahan MI, Mastura I, Asiah HN, Mariam AM, Narayanan S, Norsiah A, Sabariah I, Shariah I, Rokiah KS, Zubaidah MA, Koh CN, Rosnah I. Modifying antibiotic prescribing: the effectiveness of academic detailing plus information leaflet in a Malaysian primary care setting. The Medical Journal of Malaysia. 2006; 61(3):323-31.
1351	Rowe SY, Kelly JM, Olewe MA, Kleinbaum DG, McGowan JE Jr, McFarland DA, Rochat R, Deming MS. Effect of multiple interventions on community health workers' adherence to clinical guidelines in Siaya district, Kenya. Transactions of the Royal Society of Tropical Medicine and Hygiene. 2007; 101(2): 188-202.
1352	Rowe SY, Olewe MA, Kleinbaum DG, McGowan JE Jr, McFarland DA, Rochat R, Deming MS. Longitudinal analysis of community health workers' adherence to treatment guidelines, Siaya, Kenya, 1997-2002. Tropical Medicine and International Health. 2007; 12(5): 651-663.
1354	Qidwai W, Krishanani MK, Hashmi S, Afridi M, Ali RA. Private drug sellers' education in improving prescribing practices. Journal of the College of Physicians and Surgeons--Pakistan. 2006;16(12):743-746.
1365	Chalker J, Ratanawijitrasin S, Chuc NTK, Petzold M, Tomson G. Effectiveness of a multi-component intervention on dispensing practices at private pharmacies in Vietnam and Thailand--a randomized controlled trial. Social Science and Medicine, 2005; 60(1):131-141.
1386	Levav I, Kohn R, Montoya I, Palacio C, Rozic P, Solano I, Valentini W, Vicente B, Morales JC, Eigueta FE, Saravanan Y, Miranda CT, Sartorius N. Training Latin American primary care physicians in the WPA module on depression: results of a multicenter trial. Psychological Medicine. 2005;35(1):35-45.
1394	Pérez A, Dennis RJ, Rodríguez B, Castro AY, Delgado V, Lozano JM, Castro MC. An interrupted time series analysis of parenteral antibiotic use in Colombia. Journal of Clinical Epidemiology. 2003; 56(10): 1013-1020.
1442	Odusanya OO, Oyediran MA. The effect of an educational intervention on improving rational drug use. Nigerian Postgraduate Medical Journal. 2004 Jun;11(2):126-131.
1449	Coady DP, Filmer DP, Gwatkin DR. PROGRESA for progress: Mexico's Health, Nutrition, and Education Program. Development Outreach. World Bank. May 2005. Available at: http://www1.worldbank.org/devoutreach/may05/article.asp?id=296, accessed Oct 3, 2008
1459	Rivera JA, Rodriguez G, Shamah T, Rosado JL, Casanueva E, Maulen I, Toussaint G, García-Aranda A. Implementation, monitoring, and evaluation of the nutrition component of the Mexican Social Programme (PROGRESA). Food and Nutrition Bulletin, 2000; 21(1): 35-42.
1494	Isah AO, Isah EC, Okojie OH, Ohaju-Obodo JO. An interventional study to promote rational use of drugs with a newly developed prescribing indicator reference standards in Nigeria. Department of Medicine and Community Health, University of Benin/Teaching Hospital. 1999.
1495	Isah AO. Can drug use indicators serve as interventional tools in promoting rational use of drugs? A field testing study in Nigeria. A Report to the Drug Action Programme - World Health Organization (DAP-WHO), DAP-WHO PROJECT GLOBAL/RUS/ISAH (E19/181/49), 1999.
1496	Akoria OA, Isah AO. Prescription writing in publilc and private hospitals in Benin City, Nigeria: the effects of an educational intervention. Canadian Journal of Clinical Pharmacology. 2008; 15(2): e295-e305.
1497	IHCAR, Karolinska Institutet. Towards good pharmacy practice in Thailand and Vietnam - A mult-intervention approach to rationalise drug use through private pharmacies. Final Report. The IHCAR, HSRI, CoP & LSHTM EC Funded Collaborative Project, 1997-2000. Contract no. ERB3514PL950674. 2000. 60 pages.
1499	Saniel MC, Acuin CS, Arciaga RS, Lansang MD, Naidas OD, Balis AC, Sevilleja JEAD. Improving private physician's prescribing practices in the diagnosis and treatment of uncomplicated urinary tract infection through clinical practice guidelines. 1999.
1505	Dehli Society for Promotion of Rational Use of Drugs, INDIA-WHO Essential Drugs Programme. Research on Rational Drug Use in India: A Glimpse. 2001.
1506	Euro Health Group Consultants. Final Report. Delhi Society for the Promotion of Rational Use of Drugs (DSPRUD). External evaluation of the activities in the past 5 years, New Delhi, 7-24 October 2002. January 2003.
1509	Vergeire-Dalmacion G. Antibiotic prescribing in Philippine government health facilities within the context of the WHOCARI Program: the effect of an intervention targeting caretakers [master's thesis]. [Newcastle (NSW)]: The University of Newcastle; July 1996. 111p (excluding references).
1520	Gitau LN, Kiambuthi J. The effect of an educational intervention on use of antibiotics in the treatment of ARI and malaria in six mission hospitals in Kenya. Nairobi, Kenya: Centre for Drug Management and Policy / Mission for Essential Drugs and Supplies; 2004, 57 p.
1528	Qidwai W, Krishanani MK, Hashmi S, Afridi M, Ali RA. Private drug seller's education in improving prescribing practices: Results of an interventional study from Rural Singh, Pakistan. 16 p.
1627	Marsh VM. Implementation and evaluation of a shopkeeper training programme to optimise the home use of shop-bought antimalarial drugs for uncomplicated fevers in coastal Kenya. Department for International Development, UK. Final report 1 February 2002. Project No.: R7179.
1685	Catsambas TT, Franco LM, Gutmann M, Knebel E, Hill P, Lin Y-S. Evaluating health care collaboratives: the experience of the Quality Assurance Project. Bethesda (MD): University Research Co., LLC (URC); 2008 June. 89 p. Collaborative Evaluation Series. Published by the USAID Health Care Improvement Project.
1756	Goel P, Makhulo J, Mwangi G. Working with pharmacists in Kenya. Dialogue on Diarrhoea [Internet]. 1993 Dec - 1994 Feb [cited 2008 Dec 11]; 55:4. Appropriate Health Resources and Technologies Action Group, London, UK. Available from: http://www.diarrhoea.org/dd/pdf/dd55.pdf.
1763	Agha S, Karim AM, Balal A, Sosler S. A quasi-experimental study to assess the performance of a reproductive health franchise in Nepal. Washington DC: USAID/Commercial Market Strategies Project. Country Research Series. No.14; September 2003. 38p.
1797	Thongkrajai E. Feasibility of integrating STD services and STD/HIV/AIDS prevention into the MCH/FP programme in Thailand. Final report. 1995. 34 p. Located at: K4Health Project, Center for Communication Programs, Johns Hopkins Bloomberg School of Public Health, Baltimore, MD; POPLINE Document Number 120656.
1872	Gutiérrez G, Guiscafré H, Bronfman M, Martínez C, Padilla G, Muñoz O. [Strategies for improving the therapeutic patterns used in acute diarrhea in primary medical care units. I. Methodology and features of the medical units and the population studied]. Archivos de investigación médica. 1988;19(4):335-49. [Article in Spanish]
1873	Gutiérrez G, Guiscafré H, Muñoz O. Strategies for improving the therapeutic patterns used in acute diarrhea in primary medical care units. X. Conclusions and research perspectives. Archivos de investigación médica. 1988;19(4):437-43.
1878	Bailey PE, Szaszdi JA, Schieber B. Analysis of the Vital Events Reporting System of the Maternal and Neonatal Health Project, Quetzaltenango, Guatemala. Technical Working Paper 3. December 1994. Working Paper prepared for USAID, Contract No. DPE 5966-Z-00-8083-00. available at: http://pdf.usaid.gov/pdf_docs/PNACE151.pdf, accessed Jan 14, 2009
1886	Maluccio JA, Flores R. Impact Evaluation of a Conditional Cash Transfer Program. The Nicaraguan Red de Protección Social. Research Report 141, International Food Policy Research Institute, Washington DC. 2005. available at: http://www.ifpri.org/pubs/abstract/141/rr141.pdf, accessed Jan 14, 2009
1888	Maluccio JA, Flores R. Impact evaluation of a conditional cash transfer program: The Nicaraguan Red de Proteccion Social. FCND Discussion Paper No. 184. Food Consumption and Nutrition Division, International Food Policy Research Institute. July 2004. available at: http://www.ifpri.org/divs/fcnd/dp/papers/fcndp184.pdf, accessed Jan 15, 2009
1906	Guiscafré H, Padilla G, Reyes RM, Bronfman M, Castro V, Muñoz O, Gutiérrez G. [Strategies for improving the therapeutic patterns used in acute diarrhea in primary medical care units. VIII. Evaluation of the technics for supplementary information during the medical consultation]. Archivos de investigación médica. 1988;19(4):419-25. [Article in Spanish]
1907	Castro R, Bronfman M, Castro V, Guiscafré H, Gutiérrez G. [Strategies for improving the therapeutic patterns used in acute diarrhea in primary medical care units. IX. Analysis of the economic impact of the strategy used]. Archivos de investigación médica. 1988;19(4):427-36. [Article in Spanish]
1943	Agha S, Karim AM, Balal A, Sosler S. The impact of a reproductive health franchise on client satisfaction in rural Nepal. Health Policy and Planning. 2007; 22(5): 320-328.
1954	Chowdhury AKA, Khan OF, Matin MA, Begum K, Galib MA. Effect of standard treatment guidelines with or without prescription audit on prescribing for acute respiratory tract infection (ARI) and diarrhoea in some thana health complexes (THCs) of Bangladesh. Bangladesh Medical Research Council Bulletin, 2007;33(1):21-30.
1974	Ngasala B, Mubi M, Warsame M, Petzold MG, Massele AY, Gustafsson LL, Tomson G, Premji Z, Bjorkman A. Impact of training in clinical and microscopy diagnosis of childhood malaria on antimalarial drug prescription and health outcome at primary health care level in Tanzania: a randomized controlled trial. Malaria Journal. 2008; 7:199.
2010	Senarath U, Fernando D, Rodrigo I. Effect of training for care providers on practice of essential newborn care in hospitals in Sri Lanka. Journal of Obstetric Gynecologic and Neonatal Nursing. 2007 Nov-Dec;36(6):531-541.
2054	Abuya T, Fegan G, Rowa Y, Karisa B, Ochola S, Mutemi W, Marsh V. Impact of Ministry of Health interventions on private medicine retailer knowledge and practices on anti-malarial treatment in Kenya. American Journal of Tropical Medicine & Hygiene. 2009; 80(6): 905-913.
2058	Osterholt DM, Onikpo F, Lama M, Deming MS, Rowe AK. Improving pneumonia case-management in Benin: a randomized trial of a multi-faceted intervention to support health worker adherence to Integrated Management of Childhood Illness guidelines. Human Resources for Health. 2009;7 (77): 1-13.
2059	Rowe AK, Onikpo F, Lama M, Osterholt DM, Rowe SY, Deming MS. A multifaceted intervention to improve health worker adherence to integrated management of childhood illness guidelines in Benin. American Journal of Public Health. 2009; 99(5): 837-846.
2088	Barham T, Brenzel L, Maluccio JA. BEYOND 80%: ARE THERE NEW WAYS OF INCREASING VACCINATION COVERAGE? Evaluation of CCT Programs in Mexico and Nicaragua. June 2007. available at: http://ssrn.com/abstract=993760. accessed June 12, 2009.
2134	Glassman A, Todd J, Gaarder M. Chapter 6: Latin America: Cash Transfers to Support Better Household Decisions. p. 89-121. In: Eichler R, Levine R, and the Performance-Based Incentives Working Group. Performance incentives for global health: potential and pitfalls. Versa Press: East Peoria, Illinois. 2009. available at: http://www.cgdev.org/doc/books/PBI/06_CGD_Eichler_Levine-Ch6.pdf; accessed Jul…
2135	Hernández B, Hernández M, eds. External evaluation of the impact of the Oportunidades program 2004. Volume II, Health. Cuernavaca, México: Instituto Nacional de Salud Pública, 2005. 332 p.
2136	Hernández B, Hernández M, eds. External evaluation of the impact of the Oportunidades program 2004 Volume III, Nutrition. Cuernavaca, México: Instituto Nacional de Salud Pública, 2005. 152 p.
2139	Stecklov G, Winters P, Todd J, Regalia F. Demographic Externalities from Poverty Programs in Developing Countries: Experimental Evidence from Latin America. Department of Economics Working Paper Series. No. 2006-1. January 2006. American University: Washington, DC. available at: http://www1.american.edu/academic.depts/cas/econ/workingpapers/2006-01.pdf; accessed July 7, 2009.
2143	Regalía F, Castro L. Chapter 11: Nicaragua: Combining Demand- and Supply-Side Incentives. p. 215-235. In: Eichler R, Levine R, and the Performance-Based Incentives Working Group. Performance incentives for global health: potential and pitfalls. Versa Press: East Peoria, Illinois. 2009. available at: http://www.cgdev.org/doc/books/PBI/06_CGD_Eichler_Levine-Ch11.pdf; accessed July 7, 2009.
2190	Ouma PO, Van Eijk AM, Hamel MJ, Sikuku E, Odhiambo F, Munguti K, Ayisi JG, Kager PA, Slutsker L. The effect of health care worker training on the use of intermittent preventive treatment for malaria in pregnancy in rural western Kenya. Tropical Medicine and International Health. 2007; 12(8): 1-9.
2233	Carrón JM, Melián MM, León FR. Developing tools of low-cost use to improve the quality of care of rural CBD in Paraguay: final report -- January 1, 1992 - July 31, 1994. Centro Paraguayo de Estudios de Poblacion (CEPEP), Population Council, Latin America and Caribbean Regional Office, USAID. Bureau for Global Programs, Field Support, and Research. Center for Population, Health and Nutrition. Offi…
2237	Arifeen SE, Hoque DME, Akter T, Rahman M, Hoque ME, Begum K, Chowdhury EK, Khan R, Blum LS, Ahmed S, Hossain MA, Siddik A, Begum N, Rahman QS, Haque TM, Billah SM, Islam M, Rumi RA, Law E, Al-Helal ZAM, Baqui AH, Schellenberg J, Adam T, Moulton LH, Habicht JP, Scherpbier RW, Victora CG, Bryce J, Black RE. Effect of the Integrated Management of Childhood Illness strategy on childhood mortality and…
2247	Regalía F, Castro L. Performance-Based Incentives for Health: Demand- and Supply-Side Incentives in the Nicaraguan Red de Protección Social. CGD Working Paper #119. April 2007. Center for Global Development. available at: http://www.cgdev.org/content/publications/detail/13541, accessed Sept 7, 2009
2248	Glassman A, Todd J, Gaarder M. Performance-Based Incentives for Health: Conditional Cash Transfer Programs in Latin America and the Caribbean. CGD Working Paper #120. April 2007. Center for Global Development. Available at: http://www.cgdev.org/content/publications/detail/13542, accessed Sept 7, 2009.
2268	Bawa SB, Olumide EAA, Umar US. The knowledge, attitude and practices of the reporting of notifiable diseases among health workers in Yobe State, Nigeria. African Journal of Medicine and Medical Sciences, 2003; 32(1):49-53.
2274	Kafle KK, Shrestha AD, Shrestha N, Prasad RR, Das PL, Bhuju GB. Test of sustainability of strategy in implementing STS for improving use of drugs. Technical Report, INRUD, Nepal, 2002. available at: http://www.inrud-nepal.org.np/publications/STS-Test%20of%20sustainability.pdf, accessed Dec 30, 2009
2275	IHCAR, Karolinska Institutet. Towards good pharmacy practice in Thailand and Vietnam - A multi-intervention approach to rationalise drug use through private pharmacies. Individual Partner Report LSHTM. The IHCAR, HSRI, CoP & LSHTM EC Funded Collaborative Project, 1997-2000. Contract no. ERB3514PL950674. June 2000. 7 pages.
2276	IHCAR, Karolinska Institutet. Towards good pharmacy practice in Thailand and Vietnam - A multi-intervention approach to rationalise drug use through private pharmacies. Individual Partner Report CoP Vietnam. The IHCAR, HSRI, CoP & LSHTM EC Funded Collaborative Project, 1997-2000. Contract no. ERB3514PL950674. 2000. 15 pages.
2277	IHCAR, Karolinska Institutet. Towards good pharmacy practice in Thailand and Vietnam - A multi-intervention approach to rationalise drug use through private pharmacies. Completed Catalogue Page. The IHCAR, HSRI, CoP & LSHTM EC Funded Collaborative Project, 1997-2000. Contract no. ERB3514PL950674. 2000. 1 page.
2279	Kwast BE. Building a community-based maternity program. International Journal of Gynecology & Obstetrics, 1995;48 Suppl:S67-82.
2280	Kwast BE. Reduction of maternal and perinatal mortality in rural and peri-urban settings: what works? European Journal of Obstetrics & Gynecology and Reproductive Biology, 1996;69(1):47-53.
2285	MotherCare. Quetzaltenango Maternal and Neonatal Health Project. Pages 33-38. In: MotherCare, 1989-1993: country project descriptions. John Snow, Inc., USAID. September 1993. USAID Award/Agreement Number: DPE-5966-Z-00-8083-00. 57 pages.
2288	Rawlings RB, Rubio GM. Evaluating the Impact of Conditional Cash Transfer Programs. The World Bank Research Observer 2005; 20(1):29-55.
2294	O'Rourke K. The effect of hospital staff training on management of obstetrical patients referred by traditional birth attendants. In: MotherCare Matters Newsletter and literature review on maternal and neonatal health and nutrition, 1996;5(4):4-7.
2295	Scheiber BA, Mejia M, Koritz S, Gonsalez C, Kwast BE. Medical audit of early neonatal deaths -- INCAP/Quetzaltenango Maternal and Neonatal Health Project. In: MotherCare Matters Newsletter and literature review on maternal and neonatal health and nutrition, 1996;5(4):7-12.
2296	Bailey PE, Szaszdi JA, Schieber B. Analysis of the Vital Events Reporting System of the Maternal and Neonatal Health Project, Quetzaltenango, Guatemala. In: MotherCare Matters Newsletter and literature review on maternal and neonatal health and nutrition, 1996;5(4):13-22.
2313	León FR, Brambila C, de la Cruz M, García Colindres J, Morales C, Vásquez B. Providers' compliance with the balanced counseling strategy in Guatemala. Studies in Family Planning. 2005; 36(2): 117-126.
2326	Carrón JM, Melián MM, León FR. Desarrollando instrumentos de bajo costo para mejorar la calidad de los servicios rurales de planificación familiar: informe final -- Enero 1992 - Diciembre 1993. Asunción, Paraguay: Centro Paraguayo de Estudios de Poblacion (CEPEP), Population Council, 1993. 16p.
2333	Olewe M, Garg R, Deming MS. Community initiatives for child survival in Siaya District, Kenya. Centers for Disease Control and Prevention, Atlanta, Georgia. 9 p.
2359	Westphal MF, Taddei JA, Venancio SI, Bogus CM. Breast-feeding training for health professionals and resultant institutional changes. Bulletin of the World Health Organization. 1995; 73(4): 461-468.
2370	Hizaamu RNB, Waluga P. Total quality management. PowerPoint presentation presented at the Jinja District Local Government Health Management Team Quarterly Feedback Meeting; 2005 October; Uganda, and the HIV & AIDS Fellowship Programme Annual Dissemination Workshop; 2005 December 2; Uganda.
2377	Kasemsarn P, Ngarmpiyasakul C, Phongpanich S, Pulkasisri N. Baby-friendly hospital: how to sustain? Journal of the Medical Association of Thailand. 1995; 78(7):362-368.
2389	Gani L, Tangkilisan A, Pujilestari L. Improving rational prescribing of physicians: an educational approach for acute diarrhoea in children in Jakarta. Paper presented at: First International Conference on Improving Use of Medicines (ICIUM); 1997 April 1-4; Chiang Mai, Thailand [cited March 29, 2010]. Available from: http://archives.who.int/icium/icium1997/posters/2b2_text.html
2414	Zaman S, Ashraf RN, Martines J. Training in complementary feeding counselling of healthcare workers and its influence on maternal behaviours and child growth: a cluster randomized controlled trial in Lahore, Pakistan. Journal of Health Population and Nutrition. 2008; 26(2): 210-222.
2422	Aupont O. Reducing multiple antibiotics in treatment of acute respiratory infections (ARI): A planned intervention in Haiti. Poster presented at: First International Conference on Improving Use of Medicines (ICIUM); 1997 1 - 4 Apr; Chiang Mai, Thailand. Available from: http://archives.who.int/icium/icium1997/posters/2P17_TXT.html, accessed April 8, 2010.
2428	Gitau L, Kiambuthi J. Recent advances in provision of primary health care by mission organizations: the effect of an educational intervention on antibiotic use in the treatment of ARI and malaria in six mission hospitals in Kenya. Presented at: Second International Conference on Improving Use of Medicines; March 30 - April 2, 2004; Chiang Mai, Thailand [cited April 9, 2010]. 16 p. Available from:…
2430	Tumwikirize WA, Ekwaru JP, Mohammed K, Ogwal-Okeng JW, Aupont O. Impact of a face-to-face educational intervention on improving the management of ARI in private pharmacies and drug shops in Uganda. Presented at: The Second International Conference on Improving Use of Medicines (ICIUM) 2004; 2004 March 30 - April 2 [cited 2010 April 9]; Chiang Mai, Thailand. Available from: http://www.icium.org/ic…
2432	Dung PH, Chuc NTK, Ross-Degnan D. Improving community drug use focusing on hospital out-patient through peer review and implementation of guidelines for ARI treatment. Presented at the Second International Conference on Improving Use of Medicines, Chiang Mai, Thailand, March 30 - April 2, 2004. available at: http://www.icium.org/icium2004/resources/ppt/O_CH021.ppt, accessed April 9, 2010.
2433	Taylor O, Momodu RO, Odufalu O. Improving chloroquine prescribing in private clinics in Lagos State, Nigeria. Presented at: Second International Conference on Improving Use of Medicines (ICIUM); 2004 March 30-April 2; Chiang Mai, Thailand [cited April 9, 2010]. 13 p. Available from: http://www.icium.org/icium2004/resources/ppt/O_MA011.ppt
2437	Pérez A, Dennis RJ, Rodríguez B, Castro AY, Delgado V, Lozano JM. Improvement of parenteral antibiotic use in a university hospital in Colombia. Presented at: 2nd International Conference on Improving Use of Medicines (ICIUM); 2004 March 30 - April 2; Chiang Mai, Thailand. 20 p.
2440	Saniel MC, Acuin CS, Arciaga RS, Lansang MD, Naidas OD, Sevilleja JEAD, Bustos MV, Balais AC, Ross-Degnan D. Improving private practitioners’ adherence to evidence-based practice guidelines: a quasi-experimental study in the Philippines. Presented at the Second International Conference on Improving Use of Medicines, Chiang Mai, Thailand, March 30 - April 2, 2004. Available at: http://www.icium.or…
2476	Ofei F, Forson A, Tetteh R, Ofori-Adjei D. An intervention to improve antibiotic prescribing habits of doctors in a teaching hospital. Presented at: Second International Conference on Improving Use of Medicines (ICIUM); March 30 - April 2, 2004; Chiang Mai, Thailand [cited April 10, 2010]. 13 p. Available from: http://www.icium.org/icium2004/resources/ppt/AD029.ppt
2491	Gülmezoglu AM, Langer A, Piaggio G, Lumbiganon P, Villar J, Grimshaw J. Cluster randomised trial of an active, multifaceted educational intervention based on the WHO Reproductive Health Library to improve obstetric practices. BJOG: An International Journal of Obstetrics and Gynecology. 2007;114(1):16-23.
2492	Gülmezoglu AM, Villar J, Grimshaw J, Piaggio G, Lumbiganon P, Langer A. Cluster randomized trial of an active, multifaceted information dissemination intervention based on the WHO Reproductive health library to change obstetric practices: methods and design issues [ISRCTN14055385]. BMC Medical Research Methodology. 2004; 4:2.
2500	Stecklov G, Winters P, Todd J, Regalia F. Unintended effects of poverty programmes on childbearing in less developed countries: experimental evidence from Latin America. Population Studies. 2007;61(2):125-40.
2501	BarhamT, Maluccio J. Eradicating disease: the effect of conditional cash transfers on vaccination coverage in rural Nicaragua. Journal of Health Economics, 2009;38(3): 611-621.
2513	Abdel-Tawab N, Rao SR. Do improvements in client–provider interaction increase contraceptive continuation? Unraveling the puzzle. Patient Education and Counseling. 2010;81:381-387.
2514	Social Planning, Analysis and Administration Consultants (SPAAC). Impact of improved client-provider interaction on women’s achievement of fertility goals, summary of the intervention. FRONTIERS Report. Washington, DC: Population Council, October 2002. 12p. US Agency for International Development. Cooperative Agreement No.: HRN-A-00-98-00012-00, Sub-project No.: 5800.13038.
2515	Social Planning, Analysis and Administration Consultants (SPAAC). Impact of improved client-provider interaction on women’s achievement of fertility goals, summary of key findings. FRONTIERS Report. Washington, DC: Population Council. October 2002. 14p. US Agency for International Development. Cooperative Agreement No.: HRN-A-00-98-00012-00, Sub-project No.: 5800.13038.
2525	Ramarao S, Mir AM. Transforming relationships in Pakistani villages. Quality / Calidad / Qualité. 2004; 15: 20-34.
2526	Goel PK, Ross-Degnan D, McLaughlin TJ, Soumerai SB. Influence of location and staff knowledge on quality of retail pharmacy prescribing for childhood diarrhea in Kenya. International Journal for Quality in Health Care. 1996;8(6):519-26.
2528	Tumwikirize WA, Ekwaru PJ, Mohammed K, Ogwal-Okeng JW, Aupont O. Management of acute respiratory infections in drug shops and private pharmacies in Uganda: a study of counter attendants' knowledge and reported behaviour. East African Medical Journal. 2004; 81(2 Suppl): S33-S40.
2537	Antimalarial Drug Retailer Training Programme: A manual for training drug retailers on over-the-counter drugs for childhood fevers. Kenya; 2001. KEMRI Wellcome Trust.
2538	Johnson KW, Young LC, Bryant D, Suresh G, Bettler RF (Pacific Institute for Research and Evaluation- Louisville Center), Berbaum ML (Health Research and Policy Centers, University of Illinois at Chicago). The Daytop drug-free treatment training evaluation. Research Monograph. Washington DC. Bureau for International Narcotics and Law Enforcement Affairs, Department of State. July 2000. 77p.
2543	Gitau LN, Kiambuthi J. Study to assess the effect of an educational intervention to influence appropriate prescribing in the use of antibiotics in the treatment of ARI and malaria in mission hospitals in Kenya. Nairobi, Kenya: Centre for Drug Management and Policy / Mission for Essential Drugs and Supplies. 18 p.
2549	Valentini W, Levav I, Kohn R, Miranda CT, Mello AA, Mello MF, Ramos CP. Treinamento de clínicos para o diagnóstico e tratamento da depressão [An educational training program for physicians for diagnosis and treatment of depression]. Revista de saúde pública. 2004;38(4):522-8.
2550	Vicente B, Kohn R, Levav I, Espejo F, Saldivia S, Sartorius N. Training primary care physicians in Chile in the diagnosis and treatment of depression. Journal of Affective Disorders. 2007;98(1-2):121-7.
2551	Rowe AK, Onikpo F, Lama M, Deming MS. The rise and fall of supervision in a project designed to strengthen supervision of Integrated Management of Childhood Illness in Benin. Health Policy and Planning. 2010; 25(2): 125-134.
2554	Agha S, Gage A, Balal A. Changes in perceptions of quality of, and access to, services among clients of a fractional franchise network in Nepal. Journal of Biosocial Science. 2007; 39(3):341-354.
2555	Franco LM, Marquez L. Effectiveness of collaborative improvement: evidence from 27 applications in 12 less-developed and middle-income countries. British Medical Journal Quality & Safety. 2011; 20(8):658-65.
2556	Franco LM, Marquez L, Ethier K, Balsara Z, Isenhower W. Results of collaborative improvement: effects on health outcomes and compliance with evidence-based standards in 27 applications in 12 countries. Bethesda (MD): University Research Co., LLC (URC); 2009 December. 48 p. Collaborative Evaluation Series. Published by the USAID Health Care Improvement Project.
2557	USAID Health Care Improvement Project. The Improvement Collaborative: an approach to rapidly improve health care and scale up quality services. Bethesda (MD): University Research Co., LLC (URC); 2008 June. 20 p. Published by the USAID Health Care Improvement Project.
2562	Van Eijk AM, Blokland IE, Slutsker L, Odhiambo F, Ayisi JG, Bles HM, Rosen DH, Adazu K, Lindblade KA. Use of intermittent preventive treatment for malaria in pregnancy in a rural area of western Kenya with high coverage of insecticide-treated bed nets. Tropical Medicine and International Health. 2005; 10(11): 1134-1140.
2572	Broughton E, Saley Z, Boucar M, Alagane D, Hill K, Marafa A, Asma Y, Sani K. Cost-effectiveness of a quality improvement collaborative for obstetric and newborn care in Niger. International Journal of Health Care Quality Assurance. 2013;26(3):250-61.
2573	Franco LM, Webb L. Niger Site Visit Report. Unpublished report prepared for the U.S. Agency for International Development (USAID) by the USAID Health Care Improvement Project and the Quality Assurance Project. 2008 February. pp iii-v and 30-42.
2576	Dung PH, Chuc NTK, Dung NT, Ross-Degnan D. Improving ARI treatment in Vietnam district hospitals through implementation of locally adapted standard treatment guidelines, peer review, and supervision. Draft manuscript. 2005 October. 17 p.
2577	Akter SFU, Heller RD, Smith AJ, Milly AF. Impact of a training intervention on use of antimicrobials in teaching hospitals. The Journal of Infection in Developing Countries. 2009;3(6):447-51.
2578	Charandabi SMA, Vahidi R, Marions L, Wahlström R. Effect of a peer-educational intervention on provider knowledge and reported performance in family planning services: a cluster randomized trial. BMC Medical Education. 2010; 10:11.
2580	Khanal S, Ibrahim MIM, Shankar PR, Palaian S, Mishra P. Evaluation of academic detailing programme on childhood diarrhoea management by primary healthcare providers in Banke district of Nepal. Journal of Health, Population and Nutrition. 2013;31(2):231-42.
2584	Khanal S, Palaian S, Shankar PR, Mishra P, Ibrahim MIM. Impact of educational outreach visits by pharmacists on treatment of childhood diarrhoea - initial findings from Banke district, Nepal. South East Asian Journal of Medical Education. 2009;3(2):76-77.
2585	Alam N, Alam A, Fournier P. Medicine Sellers for Prevention and Control of Sexually Transmitted Infections: Effect of a Quasi-Experimental Training Intervention in Bangladesh. BioMed Research International. 2015; 2015:570340
2589	Baumgartner JN, Morroni C, Mlobeli RD, Otterness C, Buga G, Chen M. Impact of a provider job aid intervention on injectable contraceptive continuation in South Africa. Studies in Family Planning. 2012;43(4):305-14.
2595	Awor P, Wamani H, Tylleskar T, Jagoe G, Peterson S. Increased access to care and appropriateness of treatment at private sector drug shops with integrated management of malaria, pneumonia and diarrhoea: a quasi-experimental study in Uganda. PLoS One. 2014;9(12):e115440.
2596	Awor P. Drug shops in integrated community case management of malaria, pneumonia and diarrhoea in Uganda. Appropriateness of care and adherence to treatment guidelines [dissertation]. [Bergen (Norway)]: University of Bergen; 2016. 120 p.
2597	Awor P, Wamani H, Bwire G, Jagoe G, Peterson S. Private sector drug shops in integrated community case management of malaria, pneumonia, and diarrhea in children in Uganda. The American Journal of Tropical Medicine and Hygiene. 2012;87(5 Suppl):92-6.
2598	Awor P, Wamani H, Tylleskar T, Peterson S. Drug seller adherence to clinical protocols with integrated management of malaria, pneumonia and diarrhoea at drug shops in Uganda. Malaria Journal. 2015;14:277.
2599	Bazant E, Sarkar S, Banda J, Kanjipite W, Reinhardt S, Shasulwe H, Mulilo JMC, Kim YM. Effects of a performance and quality improvement intervention on the work in HIV-related care: a quasi-experiemental evaluation in Zambia. Human Resources for Health. 2014;12:73.
2600	Kim YM, Banda J, Hiner C, Tholandi M, Bazant E, Sarkar S, Andrade ASA, Makwala C. Assessing the quality of HIV/AIDS services at military health facilities in Zambia. International Journal of STD & AIDS. 2013; 24:365-70.
2601	Kim YM, Banda J, Kanjipite W, Sarkar S, Bazant E, Hiner C, Tholandi M, Reinhardt S, Njobvu PD, Kols A, Benavides B. Improving performance of Zambia Defence Force antiretroviral therapy providers: evaluation of a standards-based approach. Global Health: Science and Practice. 2013; 1(2):213-27.
2663	Baumgartner JN, Morroni C, Mlobeli RD, Otterness C, Myer L, Janowitz B, Stanback J, Buga G. Timeliness of contraceptive reinjections in South Africa and its relation to unintentional discontinuation. International Family Planning Perspectives. 2007;33(2):66-74.
2672	El-Sayed H, Martines J, Rakha M, Zekry O, Abdel-Hak M, Abbas H. The effectiveness of the WHO training course on complementary feeding counseling in a primary care setting, Ismailia, Egypt. Journal of Egyptian Public Health Association. 2014; 89(1):1-8.
2674	Fritz J, Walker D, Cohen S, Angeles G, Lamadrid-Figueroa H. Can a simulation-based training program impact the use of evidence based routine practices at birth? Results of a hospital-based controlled trial in Mexico. Poster session presented at: Global Maternal Newborn Health Conference; 2015 Oct 18-21; Mexico City, Mexico.
2676	Garba MA, Mustapha GM, Rejoice C, Mustapha B, Alhaji MA, Bello IA, Hassan AE. Competence-based learning: The effectiveness of targeted resident education and clinical auditing feedback on completed death certificate accuracy rates. Nigerian Journal of Paediatrics. 2015; 42(2):132-6.
2679	Garjani A, Salimnejad M, Shamsmohamadi M, Baghchevan V, Vahidi RG, Maleki-Dijazi N, Rezazadeh H. Effect of interactive group discussion among physicians to promote rational prescribing. Eastern Mediterranean Health Journal. 2009;15(2):408-15.
2685	Hemminki E, Long Q, Zhang WH, Wu Z, Raven J, Tao F, Yan H, Wang Y, Klemetti R, Zhang T, Regushevskaya E, Tang S. Impact of financial and educational interventions on maternity care: results of cluster randomized trials in rural China, CHIMACA. Maternal and Child Health Journal. 2013;17(2):208-21.
2686	Zhang WH, Raven J, Zhang TH, Shen Y, Huang K, Long Q, Klemetti R, Temmerman M, Hemminki E, the CHIMACA study group. Implementation of interventions in the CHIMACA project. National Institute for Health and Welfare (THL), Discussion papers 13/2010. Helsinki 2010.
2688	Lamadrid-Figueroa H. Impact of PRONTO: results of a cluster randomized trial in Mexico. Paper presented at: Global Maternal Newborn Health Conference; 2015 Oct 18-21; Mexico City, Mexico.
2689	Walker D, Cohen S, Fritz J, Olvera M, Lamadrid-Figueroa H, Cowan JG, Hernandez DG, Dettinger JC, Fahey JO. Team training in obstetric and neonatal emergencies using highly realistic simulation in Mexico: impact on process indicators. BMC Pregnancy and Childbirth. 2014; 14:367.
2690	Walker D, Cohen SR, Fritz J, Olvera-Garcia M, Zelek ST, Fahey JO, Romero-Martinez M, Montoya-Rodriguez A, Lamadrid-Figueroa H. Impact evaluation of PRONTO Mexico: a simulation-based program in obstetric and neonatal emergencies and team training. Simulation in Healthcare. 2016; 11(1):1-9.
2696	Abt. Association Inc. (Bethesda, MD). Impact of Offering Family Planning and Business Trainings to Private Facilities in Nigeria; 2015. 4 p. The Strengthening Health Outcomes through the Private Sector Project No.: AID-620-LA11-00001
2697	Ugaz J, Leegwater A, Chatterji M, Johnson D, Baruwa S, Toriola M, Kinnan C. Impact of family planning and business trainings on private-sector health care providers in Nigeria. International Perspectives on Sexual and Reproductive Health. 2017; 43(2):TK-TK.
2698	Johnson D, Woodman B, Baruwa S, Toriola M, Chatterji M, Kinnan C, Jackson J, Carmona A. A Census of Private Health Facilities in Six States of Nigeria. Bethesda, MD: Strengthening Health Outcomes through the Private Sector Project, Abt Associates Inc. 2014. 70 p. Cooperative Agreement No.: AID-620-LA-11-00001
2699	Fritz J, Walker D, Cohen S, Angeles G, Lamadrid-Figueroa H. Can a simulation-based training program impact the use of evidence based routine practices at birth? Results of a hospital-based controlled trial in Mexico. Currently under review. 2016.
2700	Long Q, Huang K, Shen Y, Hemminki E. Community-based randomised financial interventions for prenatal care: lesson from implementation in two rural counties in China. https://www.thl.fi/documents/189940/1590285/Financial-intervention-30012012.pdf/33c3ac8e-df49-41cd-9545-3486c4ffa00a
2701	Khanal S. Study the impact of academic detailing on childhood diarrhoea management to the primary healthcare providers in Nepal [master’s thesis]. [Penang (Malaysia)]: Universiti Sains Malaysia; 2010, 217 p.
2709	Das J, Chowdhury A, Hussam R, Banerjee AV. The impact of training informal health care providers in India: A randomized controlled trial. Science. 2016 7;354(6308)
2710	Das J, Chowdhury A, Hussam R, Banerjee AV. Project Brief for Das J, et. al. The impact of training informal health care providers in India: A randomized controlled trial. Science. 2016 Oct 6; 2 p.
2712	Jenkins R, Othieno C, Okeyo S, Kaseje D, Aruwa J, Oyug H, Bassett P, Kauye F. Short structured general mental health in service training programme in Kenya improves patient health and social outcomes but not detection of mental health problems - a pragmatic cluster randomised controlled trial. International Journal of Mental Health Systems. 2013; 7:25.
2713	Jenkins R, Othieno C, Okeyo S, Aruwa J, Wallcraft J, Jenkins B. Exploring the perspectives and experiences of health workers at primary health facilities in Kenya following training. International Journal of Mental Health Systems. 2013; 7:6.
2714	Jenkins R, Othieno C, Okeyo S, Aruwa J, Kingora J, Jenkins B. Health systems challenges to integration of mental health delivery in primary care in Kenya - perspectives of primary care health workers. BMC Health Services Research. 2013; 13:368.
2715	Othieno C, Jenkins R, Okeyo S, Aruwa J, Wallcraft J, Jenkins B. Perspectives and concerns of clients at primary health care facilities involved in evaluation of a national mental health training programme for primary care in Kenya. International Journal of Mental Health Systems. 2013; 7(5):1-7.
2716	Jennings L, Yebadokpo AS, Affo J, Agbogbe M. Antenatal counseling in maternal and newborn care: use of job aids to improve health worker performance and maternal understanding in Benin. BMC Pregnancy Childbirth. 2010;10:75.
2717	Jennings L, Yebadokpo A, Affo J, Agbogbe M. Use of job aids to improve facility-based postnatal counseling and care in rural Benin. Maternal Child Health Journal. 2015;19(3):557-65.
2718	Jere DL, Kaponda CPN, Chimwaza A, Crittenden KS, Kachingwe ST, McCreary L, Norr JL, Norr K. Improving universal precautions and client teaching for rural health workers: a peer-group intervention. AIDS Care. 2010; 22(5):649-57.
2720	Jennings L. Quality and impact of maternal and newborn care counseling by skilled and lay health providers in Zou/Collines, Benin [dissertation]. [Baltimore]:John Hopkins University. 2009. 200 p.
2725	Kafle KK, Karkee SB, Shrestha N, Prasad RR, Bhuju GB, Das PL, Shrestha AD, Ross-Degnan D. Improving private drug sellers' practices for managing common health problems in Nepal. Journal of Nepal Health Research Council. 2013; 11(24):198-204.
2730	Norr K, Kaponda CPN, Dancy BL, Jere DL, Kachingwe SI, Kafulafula U, McCreary LL, Mbeba MM, Norr JL, Talashek ML. A primary health care intervention to mobilize health workers for HIV prevention in Malawi. Primary Health Care Research and Development. 2006; 7:318-30.
2731	Talashek ML, Kaponda CPN, Jere DL, Kafulafula U, Mbeba MM, McCreary LL, Norr K. Identifying what rural health workers in Malawi need to become HIV prevention leaders. Journal of the Association of Nurses in AIDS Care. 2007; 18(4):41-50.
2732	Kauye F, Jenkins R, Rahman A. Training primary health care workers in mental health and its impact on diagnoses of common mental disorders in primary care of a developing country, Malawi: a cluster-randomized controlled trial. Psychological Medicine. 2014; 44(3):657-66.
2733	Khoo EM, Sararaks S, Lee WK, Liew SM, Cheong AT, Samad AA, Maskon K, Hamid MA. Reducing medical errors in primary care using a pragmatic complex intervention. Asia-Pacific Journal of Public Health. 2015; 27(6): 670-7.
2734	Jenkins R, Kiima D, Njenga F, Okonji M, Kingora J, Kathuku D, Lock S. Integration of mental health into primary care in Kenya. World Psychiatry. 2010; 9(2): 118-20.
2735	Jenkins R, Kiima D, Okonji M, Njenga F, Kingora J, Lock S. Integration of mental health into primary care and community health working in Kenya: context, rationale, coverage and sustainability. Mental Health in Family Medicine. 2010; 7(1): 37-47.
2736	Kols A, Kim YM, Bazant E, Necochea E, Banda J, Stender S. A standards-based approach to quality improvement for HIV services at Zambia Defence Force facilities: results and lessons learned. AIDS. 2015; 29 (Suppl 2):S145-53,
2737	Kumar R, Somrongthong R, Shaikh BT. Effectiveness of intensive healthcare waste management training model among health professionals at teaching hospitals of Pakistan: a quasi-experimental study. BMC Health Services Research. 2015;15:81.
2738	Kumar R, Samrongthong R, Shaikh BT. Knowledge, attitude and practices of health staff regarding infectious waste handling of tertiary care health facilities at metropolitan city of Pakistan. Journal of Ayub Medical College Abbottabad. 2013;25(1-2):109-12.
2743	Mbacham WF, Mangham-Jefferies L, Cundill B, Achonduh OA, Chandler CIR, Ambebila JN, Nkwescheu A, Forsah-Achu D, Ndiforchu V, Tchekountouo O, Akindeh-Nji M, Ongolo-Zogo P, Wiseman V. Basic or enhanced clinician training to improve adherence to malaria treatment guidelines: a cluster-randomised trial in two areas of Cameroon. Lancet Global Health. 2014; 2(6):e346-58.
2744	Mangham-Jefferies L, Wiseman V, Achonduh OA, Drake TL, Cundill B, Onwujekwe O, Mbacham W. Economic evaluation of a cluster randomized trial of interventions to improve health workers' practice in diagnosing and treating uncomplicated malaria in Cameroon. Value in Health. 2014; 17(8):783-91.
2746	Jenkins, Rachel. Value for money of a 40 hour mental health CPD training course in Kenya for primary care health workers. 2015. 3 p.
2748	Mastura I, Teng CL. The effect of ‘group detailing’ on drug prescribing in primary care. The Medical Journal of Malaysia. 2008; 63(4): 315-8.
2754	Mercer AJ, Hossain S, Khatun J, Kabir H, Saha N, Uddin J, Hasan Y. Screening for service needs in primary health care clinics: an evaluation in Bangladesh. Journal of Health and Population in Developing Countries. 2005.
2757	Mitchell EMH, Perez-Then E, Orejel-Juarez I, Baez J, Gonzales F, Morrobel AL, Marcelino B, Kamp, N. Effectiveness of interventions to increase referral of clients exhibiting TB symptoms by pharmacies and corner stores in Santo Domingo, Dominican Republic. The Open Infectious Diseases Journal. 2013; 7(Suppl 1:M5):47-53.
2759	Nanda P, Mishra A, Mukherjee S, Barua A, Mehl GL, Venkatraman CM. A study to evaluate the effectiveness of WHO tools--Orientation Programme on Adolescent Health for Health Care Providers and Adolescent Job Aid--in improving the quality of health services provided by health workers to their female adolescent clients in India. Geneva: WHO Press; 2012. 74 p. Report of a WHO, UNFPA, UNICEF Study Group
2760	Nguyen HT, Pham HT, Vo DK, Nguyen TD, van den Heuvel ER, Haaijer-Ruskamp FM, Taxis K. The effect of a clinical pharmacist-led training programme on intravenous medication errors: a controlled before and after study. BMJ Quality and Safety. 2014; 23(4): 319-24.
2761	Bin Nisar Y, Hafeez A, Zafar S, Southall DP. Impact of essential surgical skills with an emphasis on emergency maternal, neonatal and child health training on the practice of doctors: a cluster randomised controlled trial in Pakistan. Resuscitation. 2011; 82(8):1047-52.
2763	Mbeba M, Kaponda CPN, Jere DL, Kachingwe SI, Crittenden KS, McCreary LL, Norr JL, Norr KF. Peer group intervention reduces personal HIV risk for Malawian health workers. Journal of Nursing Scholarship. 2011; 43(1):72-81.
2769	Mangham LJ, Cundill B, Achonduh OA, Ambebila JN, Lele AK, Metoh TN, Ndive SN, Ndong IC, Nguela RL, Nji AM, Orang-Ojong B, Wiseman V, Pamen-Ngako J, Mbacham WF. Malaria prevalence and treatment of febrile patients at health facilities and medicine retailers in Cameroon. Tropical Medicine and International Health. 2012; 17(3):330-42.
2770	Wiseman V, Mangham LJ, Cundill B, Achonduh OA, Nji AM, Njei AN, Chandler C, Mbacham WF. A cost-effectiveness analysis of provider interventions to improve health worker practice in providing treatment for uncomplicated malaria in Cameroon: a study protocol for a randomized controlled trial. Trials. 2012; 13:4
2771	Mangham-Jefferies L, Hanson K, Mbacham W, Onwujekwe O, Wiseman V. Mind the gap: knowledge and practice of providers treating uncomplicated malaria at public and mission health facilities, pharmacies and drug stores in Cameroon and Nigeria. Health Policy and Planning. 2015; 30(9):1129-41
2774	Chandler CIR, Mangham L, Njei AN, Achonduh O, Mbacham WF, Wiseman V. 'As a clinician, you are not managing lab results, you are managing the patient': how the enactment of malaria at health facilities in Cameroon compares with new WHO guidelines for the use of malaria tests. Social Science & Medicine. 2012; 74(10): 1528-35.
2779	Nguyen HT, Nguyen TD, van den Heuvel ER, Haaijer-Ruskamp FM, Taxis K. Errors in medicines preparation and administration in Vietnamese hospitals. Poster session presented at: 18th Congress of the European Association of Hospital Pharmacists; 2013 Mar 13-15; Paris, France.
2780	Kumar R, Somrongthong R, Ahmed J. Impact of waste management training intervention on knowledge, attitude and practices of teaching hospital workers in Pakistan. Pakistan Journal of Medical Sciences. 2016; 32(3):705-10.
2781	Khoo EM, Lee WK, Sararaks S, Samad AA, Liew SM, Cheong AT, Ibrahim MY, Su SHC, Hanafiah ANM, Maskon K, Ismail R, Hamid MA. Medical errors in primary care clinics - a cross sectional study. BMC Family Practice. 2012; 13:127.
2782	Nguyen HT, Nguyen TD, van den Heuvel ER, Haaijer-Ruskamp FM, Taxis K. Medication errors in Vietnamese hospitals: prevalence, potential outcome and associated factors. PLoS One. 2015 Sep 18;10(9).
2787	Reyes-Morales H, Flores-Hernández S, Tomé-Sandoval P, Pérez-Cuevas R. A multifaceted education intervention for improving family physicians' case management. Family Medicine. 2009; 41(4): 277-84.
2790	Sangappa SB, Tekian A. Communication skills course in an Indian undergraduate dental curriculum: a randomized controlled trial. Journal of Dental Education. 2013; 77(8):1092-8.
2792	Shrestha JR, Manandhar DS, Manandhar SR, Adhikari D, Rai C, Rana H, Poudel M, Pradhan A. Maternal and Neonatal Health Knowledge, Service Quality and Utilization: Findings from a Community Based Quasi-experimental Trial in Arghakhanchi District of Nepal. Journal of Nepal Health Research Council. 2015;13(29):78-83
2793	Silva JM, Stein AT, Schunemann HJ, Bordin R, Kuchenbecker R, de Lourdes Drachler M. Academic detailing and adherence to guidelines for Group B streptococci prenatal screening: a randomized controlled trial. BMC Pregnancy and Childbirth. 2013; 13:68.
2815	Van Roekel K. Khalid M, Seru M (John Snow, Inc. Kampala, Uganda). Rational injection use in Uganda: an in-depth analysis of outpatient records in five districts. Making medical injections safer (MMIS) project study report. U.S. Agency for International Development. 2009. 88p. Contract no.: GHS-I-00-03-0026-00.
2816	Sánchez-Mendiola M, Kieffer-Escobar LF, Marín-Beltrán S, Downing SM, Schwartz A. Teaching of evidence-based medicine to medical students in Mexico: a randomized controlled trial. BMC Medical Education. 2012; 12:107.
2817	Varghese NC, Macaden L, Premkumar B, Mathews P, Kumar S. Delirium in older people in hospital: an education programme. British Journal of Nursing. 2014; 23(13):704-9.
2818	Villadsen SF, Negussie D, GebreMariam A, Tilahun A, Friis H, Rasch V. Antenatal care strengthening for improved quality of care in Jimma, Ethiopia: an effectiveness study. BMC Public Health. 2015; 15:360
2831	Public Health and Infectious Diseases Research Center (Kathmandu, Nepal). Final evaluation of the partnership for maternal and neonatal health project in Arghakhanchi and Kapilbastu districts, Nepal. 2013, p.23. Cooperative Agreement No.: GHN-A-00-09-00019-00. Supported by USAID
2832	Kumar R, Somrongthong R, Ahmed J. Effect of medical waste management trainings on behavior change among doctors versus nurse and paramedical staff in Pakistan. Journal of Ayub Medical College Abottabad, 2016; 28(3):493-6.
2833	Kaponda CPN, Jere DL, Chimango JL, Chimwaza AF, Crittenden KS, Kachingwe SI, McCreary LL, Norr JL, Norr KF. Impacts of a peer-group intervention on HIV-related knowledge, attitudes, and personal behaviors for urban hospital workers in Malawi. Journal of the Association of Nurses in AIDS Care. 2009; 20(3):230-42.
2835	Wang, Yu-qin et al. Multi-center indicator intervention research on rational drug use. 2007.
2837	Weaver MR, Pillay E, Jed SL, de Kadt J, Galagan S, Gilvydis J, Marumo E, Mawandia S, Naidoo E, Owens T, Prongay V, O'Malley G. Three methods of delivering clinic-based training on syndromic management of sexually transmitted diseases in South Africa: a pilot study. Sexually Transmitted Infections. 2016; 92(2):135-41.
2842	Zhang CH, Hsu L, Zou BR, Li JF, Wang HY, Huang J. Effects of a pain education program on nurses' pain knowledge, attitudes and pain assessment practices in China. Journal of Pain and Symptom Management. 2008; 36(6): 616-27.
2843	Zhang T, Guo L, Zhang S, Liu W, Chen G, Hui M, He G, van der Werf MJ, van den Hof S. Improving detection and notification of tuberculosis cases in students in Shaanxi province, China: an intervention study. BioMed Central Public Health. 2011; 11:147.
2844	Chen L, Wang S, Wang Q, Shi L, Wang H, Li H, Xu Y, Gao Y, Wu M, Wu L, Wang Y. Multi-center controlled study on international indicators of rational drug use - on-site investigation. Chinese Journal of Hospital Pharmacy. 2003; 23(7): 438-440.
2845	Fritz J, Walker DM, Cohen S, Angeles G, Lamadrid-Figueroa H. Can a simulation-based training program impact the use of evidence based routine practices at birth? Results of a hospital-based cluster randomized trial in Mexico. PLoS ONE. 2017; 12(3):e0172623.
2858	Cohen J, Fink G, Maloney K, Berg K, Jordan M, Svoronos T, Aber F, Dickens W. Introducing rapid diagnostic tests for malaria to drug shops in Uganda: a cluster-randomized controlled trial. Bulletin of the World Health Organization. 2015; 93(3): 142-151.
2859	Cohen J, Fink G, Berg K, Aber F, Jordan M, Maloney K, Dickens W. Feasibility of distributing rapid diagnostic tests for malaria in the retail sector: evidence from an implementation study in Uganda. PLoS One. 2012; 7(11): e48296.
2860	Achonduh OA, Mbacham WF, Mangham-Jefferies L, Cundill B, Chandler C, Pamen-Ngako J, Lele AK, Ndong IC, Ndive SN, Ambebila JN, Orang-Ojong BB, Metoh TN, Akindeh-Nji M, Wiseman V. Designing and implementing interventions to change clinicians' practice in the management of uncomplicated malaria: lessons from Cameroon. Malaria Journal. 2014;13:204.
2864	Hopkins H, Bruxvoort KJ, Cairns ME, Chandler CI, Leurent B, Ansah EK, Baiden F, Baltzell KA, Björkman A, Burchett HE, Clarke SE, DiLiberto DD, Elfving K, Goodman C, Hansen KS, Kachur SP, Lal S, Lalloo DG, Leslie T, Magnussen P, Jefferies LM, Mårtensson A, Mayan I, Mbonye AK, Msellem MI, Onwujekwe OE, Owusu-Agyei S, Reyburn H, Rowland MW, Shakely D, Vestergaard LS, Webster J, Wiseman VL, Yeung S, …
2872	Jain A, RamaRao S, Kim J, Costello M. Evaluation of an intervention to improve quality of care in family planning programme in the Philippines. Journal of Biosocial Science. 2012; 44(1):27-41.
2874	Kangwana BP, Kedenge SV, Noor AM, Alegana VA, Nyandigisi AJ, Pandit J, Fegan GW, Todd JE, Snow RW, Goodman CA. The effect of an anti-malarial subsidy programme on the quality of service provision of artemisinin-based combination therapy in Kenya: a cluster-randomized, controlled trial. Malaria Journal. 2013; 12:81
2875	Kangwana BP, Kedenge SV, Noor AM, Alegana VA, Nyandigisi AJ, Pandit J, Fegan GW, Todd JE, Brooker S, Snow RW, Goodman CA. The impact of retail-sector delivery of artemether-lumefantrine on malaria treatment of children under five in Kenya: a cluster randomized controlled trial. PLoS Medicine. 2011; 8(5):e1000437.
2877	Kyriacos U, Jelsma J, James M, Jordan S. Early warning scoring systems versus standard observations charts for wards in South Africa: a cluster randomized controlled trial. Trials. 2015; 20;16:103.
2878	Lourenço C, Kandula D, Haidula L, Ward A, Cohen JM. Strengthening malaria diagnosis and appropriate treatment in Namibia: a test of case management training interventions in Kavango Region. Malaria Journal. 2014; 13:508.
2879	Mahomed OH, Naidoo S, Asmall S, Taylor M. Improving the quality of nurse clinical documentation for chronic patients at primary care clinics: a multifaceted intervention. Curationis. 2015; 38 (1).
2880	Maloney K, Ward A, Krenz B, Petty N, Bryson L, Dolkart C, Visser T, Le Menach A, Scott VK, Cohen JM, Mtumbuka E, Mkude S. Expanding access to parasite-based malaria diagnosis through retail drug shops in Tanzania: evidence from a randomized trial and implications for treatment. Malaria Journal. 2017; 16(1):6.
2881	Maloney K, Ward A, Krenz B, Dolkart CF, Bryson L, Le Menach A, Cohen JM, Mtumbuka E, Mkude S. Malaria testing and treatment in Tanzania after introduction of rapid diagnostic tests in accredited drug dispensing outlets. Poster presented at American Society of Tropical Medicine and Hygiene (ASTMH) 63rd Annual Meeting; 2014, Nov 02 - 06, 2014; New Orleans, Louisiana.
2882	Ward A, Krenz B, Maloney K, Dolkart CF, Le Menach A, Cohen JM, Mtumbuka E, Mkude S. Drug shop dispensers demonstrate high performance in malaria RDT administration and safety in ADDOs in Tanzania. Poster presented at American Society of Tropical Medicine and Hygiene (ASTMH) 63rd Annual Meeting; 2014, Nov 02 - 06, 2014; New Orleans, Louisiana.
2887	Simwaka BN, Theobald S, Willets A, Salaniponi FM, Nkhonjera P, Bello G, Squire SB. Acceptability and effectiveness of the storekeeper-based TB referral system for TB suspects in sub-districts of Lilongwe in Malawi. PLoS One. 2012;7(9): e39746.
2890	Vithana PVSC, Ariyaratne MAY, Jayawardana PL. Effectiveness of an educational intervention among public health midwives on breast cancer early detection in the district of Gampaha, Sri Lanka. Asian Pacific Journal of Cancer Prevention. 2015; 16(1):227-32.
2891	Vithana PVSC, Ariyaratne MAY, Jayawardana PL. Educational intervention on breast cancer early detection: effectiveness among target group women in the district of Gampaha, Sri Lanka. Asian Pacific Journal of Cancer Prevention. 2015; 16(6):2547-53.
2894	Yousefi H, Nahidian M, Sabouhi F. Reviewing the effects of an educational program about sepsis care on knowledge, attitude, and practice of nurses in intensive care units. Iranian Journal of Nursing and Midwifery Research. 2012; 17 (2 Suppl 1):S91-5.
2896	Zwarenstein M, Fairall LR, Lombard C, Mayers P, Bheekie A, English RG, Lewin S, Bachmann MO, Bateman E. Outreach education for integration of HIV/AIDS care, antiretroviral treatment, and tuberculosis care in primary care clinics in South Africa: PALSA PLUS pragmatic cluster randomised trial. British Medical Journal. 2011; 342:d2022.
2902	Villadsen SF, Tersbøl BP, Negussie D, GebreMariam A, Tilahun A, Friis H, Rasch V. Antenatal care strengthening in Jimma, Ethiopia: a mixed-method needs assessment. Journal of Environmental and Public Health. 2014; 2014:945164
2904	Kyriacos U, Jelsma J, James M, Jordan S. Monitoring vital signs: development of a modified early warning scoring (MEWS) system for general wards in a developing country. PLoS One. 2014, 24;9(1):e87073
2911	D'Acremont V, Kahama-Maro J, Swai N, Mtasiwa D, Genton B, Lengeler C. Reduction of anti-malarial consumption after rapid diagnostic tests implementation in Dar es Salaam: a before-after and cluster randomized controlled study. Malaria Journal. 2011; 10:107.
2912	D'Acremont V. Massive reduction of antimalarial prescriptions during programmatic implementation of Rapid Diagnostic Test in Dar es Salaam, Tanzania. Paper presented at the 6th European Congress on Tropical Medicine and International Health. 2009 Sept 6-10; Verona, Italy.
2920	Kyabayinze DJ, Asiimwe C, Nakanjako D, Nabakooza J, Counihan H, Tibenderana JK. Use of RDTs to improve malaria diagnosis and fever case management at primary health care facilities in Uganda. Malaria Journal. 2010; 9:200
2929	Obua C, Kayiwa J, Waako P, Tomson G, Balidawa H, Chalker J, Ross-Degnan D, Wahlstrom R. Improving adherence to antiretroviral treatment in Uganda with a low-resource facility-based intervention. Global Health Action. 2014;7:24198.
2934	Thiam S, Thior M, Faye B, Ndiop M, Diouf ML, Diouf MB, Diallo I, Fall FB, Ndiaye JL, Albertini A, Lee E, Jorgensen P, Gaye O, Bell D. Major reduction in anti-malarial drug consumption in Senegal after nation-wide introduction of malaria rapid diagnostic tests. PLoS One. 2011; 6(4):e18419.
2935	Vukovic M, Gvozdenovic BS, Rankovic M, McCormick BP, Vukovic DD, Gvozdenovic BD, Kastratovic DA, Markovic SZ, Ilic M, Jakovljevic MB. Can didactic continuing education improve clinical decision making and reduce cost of quality? Evidence from a case study. Journal of Continuing Education in the Health Professions. 2015; 35(2):109-18.
2944	Kedenge SV, Kangwana BP, Waweru EW, Nyandigisi AJ, Pandit J, Brooker SJ, Snow RW, Goodman CA. Understanding the impact of subsidizing artemisinin-based combination therapies (ACTs) in the retail sector--results from focus group discussions in rural Kenya. PLoS One. 2013; 8(1):e54371.
2945	Kangwana BP, Goodman CA, Fegan GW, Noor AM, Nyandigisi AJ, Akhwale WS, Pandit J, Snow RW. The impact of retail-sector delivery of artemether-lumefantrine on effective malaria treatment of children under five in Kenya. Trial Protocol. Supporting information from Kangwana BP et al. PLoS Medicine. 2011; 8(5):e1000437.
2947	Asiimwe C, Kyabayinze DJ, Kyalisiima Z, Nabakooza J, Bajabaite M, Counihan H, Tibenderana JK. Early experiences on the feasibility, acceptability, and use of malaria rapid diagnostic tests at peripheral health centres in Uganda-insights into some barriers and facilitators. Implementation Science. 2012; 7:5.
2948	Kyabayinze DJ, Asiimwe C, Nakanjako D, Nabakooza J, Bajabaite M, Strachan C, Tibenderana JK, Van Geetruyden JP. Programme level implementation of malaria rapid diagnostic tests (RDTs) use: outcomes and cost of training health workers at lower level health care facilities in Uganda. BMC Public Health. 2012; 12:291.
2954	D'Acremont V. Understanding and improving malaria diagnosis in health facilities in Dar es Salaam, Tanzania [dissertation]. [Basel]: University of Basel; 2010. p. 150.
2955	Yukich J, D'Acremont V, Kahama J, Swai N, Lengeler C. Cost savings with rapid diagnostic tests for malaria in low-transmission areas: evidence from Dar es Salaam, Tanzania. The American Journal of Tropical Medicine and Hygiene. 2010; 83(1):61-8.
2961	Castro-Ríos A, Reyes-Morales H, Pérez-Cuevas R. [An evaluation of a continuing medical education program for primary care services in the prescription of hypoglycemic agents in diabetes mellitus type 2]. Salud Pública de México. 2008;50 Suppl 4:S445-52. Spanish.
2962	Chen WX, Li NX, He D, Ren XH. [An eight-year study on maternal and child health service utility in Sichuan province]. Zhonghua Liu Xing Bing Xue Za Zhi [Chinese Journal of Epidemiology]. 2009; 30(3):243-6. Chinese.
2963	Kim JM, Koh KW, Oak CH, Jung WH, Kim SH, Park DH. Assessment of village health worker training program in Tuguegarao, Philippine. Journal of Preventive Medicine Public Health. 2009;42(6):377-85.
2964	Kim JM, Lee HY, Park DJ, Oak CH, Jeon MJ, Yu BC, Koh KW, Lee YH. Development of village health worker training program in Tuguegarao, Phillipines. Rural Medicine. 2008; 33(3):324-34.
2965	Li L, Li Y, Long Y, Zhou Y, Lu J, Wu Y. [Experimental intervention study of safe injection in basic-level hospitals in Hunan by medical staff]. Zhong Nan Da Xue Xue Bao Yi Xue Ban [Journal of Central South University Medical Science]. 2013; 38(7):748-53. Chinese.
2966	Rambaud-Althaus C, Shao A, Samaka J, Swai N, Perri S, Kahama-Maro J, Mitchell M, D'Acremont V, Genton B. Performance of health workers using an electronic algorithm for the management of childhood illness in Tanzania: a pilot implementation study. The American Journal of Tropical Medicine and Hygiene. 2017; 96(1):249-257.
2967	Shao AF, Rambaud-Althaus C, Samaka J, Faustine AF, Perri-Moore S, Swai N, Kahama-Maro J, Mitchell M, Genton B, D'Acremont V. New algorithm for managing childhood illness using mobile technology (ALMANACH): a controlled non-inferiority study on clinical outcome and antibiotic use in Tanzania. PLoS One. 2015;10(7):e0132316.
2968	Shao AF, Rambaud-Althaus C, Swai N, Kahama-Maro J, Genton B, D'Acremont V, Pfeiffer C. Can smartphones and tablets improve the management of childhood illness in Tanzania? A qualitative study from a primary health care worker's perspective. BMC Health Services Research. 2015; 15:135.
2971	Zhang CH, Xu LH, Zhu XP, Wang HY, Huang Y, Li JF, Zheng L. Research about the effect of pain-related education program on nurses’ attitude, knowledge and assessment practices of pains. Chinese Journal of Practical Nursing. 2010; 26 (2A):30-33. [Chinese]
2973	Bheekie A, Buskens I, Allen S, English R, Mayers P, Fairall L, Majara B, Bateman ED, Zwarenstein M, Bachmann M. The Practical Approach to Lung Health in South Africa (PALSA) intervention: respiratory guideline implementation for nurse trainers. International Nursing Review. 2006; 53(4):261-8.
2974	Fairall L, Bachmann MO, Zwarenstein M, Bateman ED, Niessen LW, Lombard C, Majara B, English R, Bheekie A, van Rensburg D, Mayers P, Peters A, Chapman R. Cost-effectiveness of educational outreach to primary care nurses to increase tuberculosis case detection and improve respiratory care: economic evaluation alongside a randomised trial. Tropical Medicine and International Health. 2010;15(3):277-8…
2976	Cruz C, de la Torre R, Velazquez C. [External evaluation of the impact of the Oportunidades program]. Evaluación externa de impacto del Programa Oportunidades 2001-2006, Cuernavaca, México: Instituto Nacional de Salud Pública, 2006. 92 p.
2984	Rowe AK, Osterholt DM, Kouamé J, Piercefield E, Herman KM, Onikpo F, Lama M, Deming MS. Trends in health worker performance after implementing the Integrated Management of Childhood Illness strategy in Benin. Tropical Medicine and International Health. 2012;17(4):438-46.
2985	Hoque DME, Arifeen SE, Rahman M, Chowdhury EK, Haque TW, Begum K, Hossain MA, Akter T, Haque F, Anwar T, Billah SM, Rahman AE, Huque MH, Christou A, Baqui AH, Bryce J, Black RE. Improving and sustaining quality of child health care through IMCI training and supervision: experience from rural Bangladesh. Health Policy and Planning. 2014; 29(6):753-62.
2989	Pérez-Cuevas R, Reyes H, Guiscafré H, Juárez-Díaz N, Oviedo M, Flores S, Muñoz O. The primary care clinic as a setting for continuing medical education: program description. Canadian Medical Association Journal. 2000; 14;163(10):1295-9.
2993	Chen WX, Li NX, He D, Ren XH. [An evaluation of the maternal and child health services in Qinba Health Project in Sichuan province]. Sichuan Da Xue Xue Bao Yi Xue Ban [Journal of Sichuan University Medicine Edition]. 2008;39(6):1007-10. Chinese.
2994	Westercamp N, Staedke S, Hutchinson E, Naiga S, Nabirye C, Taaka L, Maiteki C, Kigozi S, Okiring JM, Dorsey G, Rowe AK. Effectiveness and sustainability of a collaborative improvement method to increase the quality of routine malaria surveillance data in Kayunga District, Uganda. Proceedings of the 66th Annual Meeting of the American Society of Tropical Medicine and Hygiene; 2017 Nov 5-9; Baltimo…
2995	Reyes-Morales H, Pérez-Cuevas R, Hernandez SF, Sandoval PT, Mota MAO, Diaz Gonzales NJ, Pérez JAT, Larranaga FE, Gallardo HG. [Chapter 21: Effectiveness of an educational intervention based on a critical analysis of clinical practice for appropriate care in family medicine: a feasible and sustainable proposal for continuing medical education] In: Martínez-Salgado H, Villasís-Keever MA, Torres-Lóp…
2996	Hutchinson E, Nayiga S, Nabirye C, Taaka L, Westercamp N, Rowe AK, Staedke SG. Opening the 'Black Box' of collaborative improvement: a qualitative evaluation of a pilot intervention to improve quality of surveillance data in public health centres in Uganda. 2017. 35 p.
2997	Fatuma A. The Republic of Uganda, Kayunga District Local Government: 3-year district development plan, 2010/2011 - 2012/2013. 2010 Apr 28. 233 p.
2998	Lumbiganon P, Gülmezoglu AM, Piaggio G, Langer A, Grimshaw J. Magnesium sulfate is not used for pre-eclampsia and eclampsia in Mexico and Thailand as much as it should be. Bulletin of the World Health Organization. 2007; 85(10):763-7.
2999	Bryce J, Victora CG, Habicht JP, Vaughan JP, Black RE. The multi-country evaluation of the integrated management of childhood illness strategy: lessons for the evaluation of public health interventions. American Journal of Public Health. 2004; 94(3):406-15.
3000	Mohanan M, Giardili S, Das V, Rabin TL, Raj SS, Schwartz JI, Seth A, Goldhaber-Fiebert JD, Miller G, Vera-Hernandez M. Evaluation of a social franchising and telemedicine programme and the care provided for childhood diarrhoea and pneumonia, Bihar, India. Bulletin of the World Health Organization. 2017; 95(5):343-352E.
3001	Mohanan M, Babiarz KS, Goldhaber-Fiebert JD, Miller G, Vera-Hernandez M. Effect of a large-scale social franchising and telemedicine program on childhood diarrhea and pneumonia outcomes in India. Health Affairs. 2016; 35(10):1800-1809.
3004	Parker SW, Teruel GM. Randomization and social program evaluation: The case of Progresa. The Annals of the American Academy of Political and Social Science. 2005; 599:199-217.
3005	The WHP model. Washington DC: World Health Partners; 2014. 10 p. Available from: https://web.archive.org/web/20140211090501/http:/worldhealthpartners.org/Resources/report_26.pdf Accessed 10/26/2017.
3006	Mohanan M, Vera-Hernández M, Das V, Giardili S, Goldhaber-Fiebert JD, Rabin TL, Raj SS, Schwartz JI, Seth A. The know-do gap in quality of health care for childhood diarrhea and pneumonia in rural India. JAMA Pediatrics. 2015; 169(4):349-57. doi: 10.1001/jamapediatrics.2014.3445.
3007	Mohanan M, Goldhaber-Fiebert JD, Giardili S, Vera-Hernandez M. Providers' knowledge of diagnosis and treatment of tuberculosis using vignettes: evidence from rural Bihar, India. BMJ Global Health. 2016; 1(4):1-16.
3013	Kitutu FE, Kalyango JN, Mayora C, Selling KE, Peterson S, Wamani H. Integrated community case management by drug sellers influences appropriate treatment of pediatric febrile illness in south western Uganda; a quasi-experimental study. Malaria Journal. 2017; 16(425).
3014	Kitutu FE. Effect of WHO/UNICEF iCCM innovation on drug shop pediatric fever management in South Western Uganda. Paper presented at: 64th Annual Meeting of American Society of Tropical Medicine and Hygiene; 2015 Oct 25-29; Philadelphia, PA.
3015	Kitutu FE, Mayora C, Johansoon EW, Peterson S, Wamani H, Bidgeli M, Shroff ZC. Health system effects of implementing integrated community case management (iCCM) intervention in private retail drug shops in South Western Uganda: a qualitative study. BMJ Global Health. 2017; 2:(Suppl 3): e000334.
3016	Ugaz J, Leegwater A, Chatterji M, Johnson D, Baruwa S, Toriola M, Kinnan C, Keeley R, Iroko A. Impact of family planning and business trainings on private sector health providers: Evidence from a randomized experiment in Nigeria. Bethesda (MD): Strengthening Health Outcomes through the Private Sector Project, Abt Associates Inc; 2015. 52 p. Supported by USAID. Cooperative Agreement no.: AID-620-L…
3017	English RG, Bateman ED, Zwarenstein MF, Fairall LR, Bheekie A, Bachmann MO, Majara B, Ottmani SE, Scherpbier RW. Development of a South African integrated syndromic respiratory disease guideline for primary care. Primary Care Respiratory Journal. 2008;17(3):156-63.
3021	Okawa S, Hodgson A, Shibanuma A, Kikuchi K, Asare GQ, Ansah E, Gyapong M, Owusu-Agyei S, Oduro A, Yasuoka J, Nanishi K, Jimba M, Ghana EMBRACE Implementation Research Team. Impact of the EMBRACE intervention package on better uptake of maternal newborn health services in Ghana. Poster presented at: Fourth Global Symposium on Health Systems Research; 2016 Nov 14-18; Vancouver, BC.
3022	Kikuchi K, Ansah E, Okawa S, Shibanuma A, Gyapong M, Owusu-Agyei S, Oduro A, Quansah-Asare G, Hodgson A, Jimba M; Ghana EMBRACE Implementation Research Project. Ghana's Ensure Mothers and Babies Regular Access to Care (EMBRACE) program: study protocol for a cluster randomized controlled trial. Trials. 2015; 16:22.
3025	Okawa S, Gyapong M, Leslie HH, Shibanuma A, Kikuchi K, Yeji F, Tawiah C, Addei S, Nanishi K, Oduro A, Owusu-Agei S, Ansah EK, Asare GQ, Yasuoka J, Hodgson A, Jimba M, Ghana EMBRACE Implementation Research Project Team. Effect of continuum-of-care intervention package on improving contacts and quality of maternal and newborn health care in Ghana: a cluster randomized controlled trial. Forthcoming.…
3094	Evans C. Integration of care for mothers and babies at birth to prevent and manage PPH and birth asphyxia: a facility based approach to improving care. Paper presented at: Global Maternal Newborn Health Conference; 2015 Oct 19; Mexico City, Mexico.
3109	Jain A, Agarwal R, Chawla D, Paul V, Deorari A. Tele-education vs classroom training of neonatal resuscitation: a randomized trial. Journal of Perinatology. 2010; 30(12):773-9.
3120	Kulier R, Khan KS, Gulmezoglu AM, Carroli G, Cecatti JG, Germar MJ, Lumbiganon P, Mittal S, Pattinson R, Wolomby-Molondo JJ, Bergh AM, May W. A cluster randomized controlled trial to evaluate the effectiveness of the clinically integrated RHL evidence -based medicine course. Reproductive Health. 2010; 7:8.
3121	Kulier R, Gülmezoglu AM, Zamora J, Plana MN, Carroli G, Cecatti JG, Germar MJ, Pisake L, Mittal S, Pattinson R, Wolomby-Molondo JJ, Bergh AM, May W, Souza JP, Koppenhoefer S, Khan KS. Effectiveness of a clinically integrated e-learning course in evidence-based medicine for reproductive health training: a randomized trial. JAMA. 2012; 308(21):2218-25.
3122	Kumar D, Aggarwal AK, Kumar R. The effect of interrupted 5-day training on integrated management of neonatal and childhood illness on the knowledge and skills of primary health care workers. Health Policy and Planning. 2009; 24(2):94-100.
3134	Li Q, Ma EL, Liu J, Fang LQ, Xia T. Pre-training evaluation and feedback improve medical students' skills in basic life support. Medical Teacher. 2011;33(10):e549-55.
3182	Badolo O, Nebie S, Bonkoungou M, Dodo M, Ouedraogo T, Waxman R, Brieger WR. Improving provision of malaria services through provider training in Burkina Faso: improving malaria care project (IMC). Paper presented at: The 64th Annual Meeting of the American Society of Tropical Medicine & Hygiene. 25-29 Oct 2015; Philadelphia, PA.
3184	Rawson RA, Rataemane S, Rataemane L, Ntlhe N, Fox RS, McCuller J, Brecht ML. Dissemination and implementation of cognitive behavioral therapy for stimulant dependence: a randomized trial comparison of 3 approaches. Substance Abuse. 2013; 34(2):108-17.
3193	Shirazi M, Lonka K, Parikh SV, Ristner G, Alaeddini F, Sadeghi M, Wahlstrom R. A tailored educational intervention improves doctor's performance in managing depression: a randomized controlled trial. Journal of Evaluation in Clinical Practice. 2013; 19(1):16-24.
3196	Tu J, Cai W, Zhang M, Yang X, Chen H, Zhou S, Chen X, Zhao Y, Guo J, Yang Y. Effect of the China-America Union Pre-Hospital Emergency Care Training Program on the emergency knowledge and skills of Chinese paramedics. Saudi Medical Journal. 2013; 34(2):177-80.
3198	Venkatachalam J, Kumar D, Gupta M, Aggarwal AK. Knowledge and skills of primary health care workers trained on integrated management of neonatal and childhood illness: follow-up assessment 3 years after the training. Indian Journal of Public Health. 2011; 55(4):298-302.
3199	Wagner GJ, Ngo V, Goutam P, Glick P, Musisi S, Akena D. A structured protocol model of depression care versus clinical acumen: a cluster randomized trial of the effects on depression screening, diagnostic evaluation, and treatment uptake in Ugandan HIV clinics. PLoS One. 2016; 11(5):e0153132
3200	Wagner GJ, Ngo V, Glick P, Obuku EA, Musisi S, Akena D. INtegration of DEPression Treatment into HIV Care in Uganda (INDEPTH-Uganda): study protocol for a randomized controlled trial. Trials. 2014; 15:248
3211	Evans C. Training frontline health workers in Uganda saving lives at birth: study plan Version 2. Baltimore (MD): Jhpiego; 2013 Dec. 29 p. IRB no.: 5383.
3218	Wagner GJ, Ghosh-Dastidar B, Ngo V, Robinson E, Musisi S, Glick P, Dickens A. A cluster randomized controlled trial of two task-shifting depression care models on depression alleviation and antidepressant response among HIV clients in Uganda. Research and Advances in Psychiatry. 2016; 3(1):12-21.
3219	Odokonyero R, Wagner G, Ngo V, Nakasujja N, Musisi S, Akena D. Giving ‘Sadness’ a name: the need for integrating depression treatment into HIV care in Uganda. Journal of the International Association of Providers of AIDS Care. 2015; 14(2):108-11.
3225	Badolo O, Nébié S, Dodo M, Ouedraogo T, Waxman R, Brieger W. Intermittent preventive treatment in pregnancy: increasing the doses in Burkina Faso. Paper presented at: The 64th Annual Meeting of the American Society of Tropical Medicine & Hygiene. 25-29 Oct 2015; Philadelphia, PA.
3234	Morrow A. Community-based strategies for breastfeeding promotion and support in developing countries. Geneva (Switzerland): World Health Organization; 2003. 30 p. Cooperative Agreement No. HRN-A-00-97-00007-00.
3236	Robert RC, Gittelsohn J, Creed-Kanashiro HM, Penny ME, Caulfield LE, Narro MR, Black RE. Process evaluation determines the pathway of success for a health center-delivered, nutrition education intervention for infants in Trujillo, Peru. The Journal of Nutrition. 2006;136(3):634-41.
3237	Robert RC, Gittelsohn J, Creed-Kanashiro HM, Penny ME, Caulfield LE, Narro MR, Steckler A, Black RE. Implementation examined in a health center-delivered, educational intervention that improved infant growth in Trujillo, Peru: successes and challenges. Health Education Research. 2007;22(3):318-31.
